# Supplementary material for: Manganese exposure in juvenile C57BL/6 mice increases glial inflammatory responses in the substantia nigra following infection with H1N1 influenza virus
Source: PLoS One. 2021 Jan 25;16(1):e0245171. doi: 10.1371/journal.pone.0245171 (PMC7833173; doi:10.1371/journal.pone.0245171)
Supplement: S2 Table — Transcripts uniquely expression in each experimental group are presented in S2 Table. Mapping these transcripts to the major biological pathways that were altered in each treatment group was performed using the Gene Ontology (GO) Consortium and PANTHER Classification System pathway and overrepresentation analyses. (XLSX) [file pone.0245171.s002.xlsx]

## Sheet: Control group only
Supplemental Table 2 - Uniquely Expressed Transcripts in Each Experimental Group
Gene.chrom	Gene.proteinID	RefSeq.value	refLink.name	refLink.product	GeneName.value	Description	Data has been reduced to values >2 FPKM and group mean on 3 or more samples
CONTROL							CONTROL					MEAN
chr12		NR_027651	Meg3		Meg3	Mus musculus adult male medulla oblongata cDNA, RIKEN full-length enriched library, clone:6330403F08 product:Mus musculus GTL2, imprinted maternally expressed untranslated mRNA (Gtl2), mRNA., full insert sequence.		55.8543	89.465	99.1953		81.5049
chr15	Q9QXA1	NM_019396	Cyhr1	cysteine and histidine-rich protein 1 isoform 1 precursor	Cyhr1	cysteine and histidine-rich protein 1 isoform 1	41.0866	32.3907	48.1887	48.6025		42.5671
chr11	P28661-5	NM_011129	42982	septin-4 isoform 1	2021-09-05	RecName: Full=Septin-4; AltName: Full=Brain protein H5; AltName: Full=Peanut-like protein 2;	28.3947	50.1258			43.97	40.8302
chr8	Q8R3L2-4	NM_025804	Tcf25	transcription factor 25 isoform b	Tcf25	transcription factor 25 isoform b		37.0797	32.5443	36.4997		35.3746
chr7	Q52L53	NM_011874	Psmc4	26S protease regulatory subunit 6B	Psmc4	SubName: Full=Psmc4 protein; Flags: Fragment;		17.2832	17.6793	16.6025	16.1883	16.9383
chr11		NR_035420	Mir467f		Mir467f	Mus musculus microRNA 467f (Mir467f), microRNA.		12.7486	10.0314	26.8038		16.5279
chr15	NP_084397	NM_030121	Asb8	ankyrin repeat and SOCS box protein 8	Asb8	ankyrin repeat and SOCS box protein 8	14.9436	17.9971		17.0113	14.0097	15.9904
chr11	Q6PER1	NM_011586	Myo18a	unconventional myosin-XVIIIa isoform 2	Myo18a	myosin-XVIIIa		10.8256	17.198	16.0023	17.7489	15.4437
chr13	Q9D7Z3-2	NM_023554	Nol7	nucleolar protein 7	Nol7	nucleolar protein 7	12.8728		15.954		15.8366	14.8878
chr15		NM_174991	Adgrb1	brain-specific angiogenesis inhibitor 1 precursor	Bai1	Mus musculus 10 days neonate medulla oblongata cDNA, RIKEN full-length enriched library, clone:B830018M07 product:BRAIN-SPECIFIC ANGIOGENESIS INHIBITOR 1 PRECURSOR homolog [Homo sapiens], full insert sequence.		11.6504		15.5812	10.9918	12.7411
chr9		NM_013785	Ip6k1	inositol hexakisphosphate kinase 1	Ip6k1	Mus musculus mammalian inositol hexakisphosphate kinase 1 (Ip6k1) mRNA, complete cds.		7.63523	15.1393	11.1813		11.3186
chr14	P28867-2	NM_011103	Prkcd	protein kinase C delta type isoform 2	Prkcd	protein kinase C delta type			11.7072	10.9093	11.0548	11.2238
chr2	A2ANQ4	NM_001177839	Smox	spermine oxidase isoform h	Smox	spermine oxidase isoform h	10.4814	7.76685	12.5736	12.0339		10.7139
chr7	D3YYW8	NM_133693	Rbm42	RNA-binding protein 42	Rbm42	RNA-binding protein 42	7.54875	10.2651	12.3614		11.2627	10.3595
chr3		NR_015498	1500004A13Rik		Syt11	Mus musculus adult male diencephalon cDNA, RIKEN full-length enriched library, clone:9330131K01 product:unclassifiable, full insert sequence.	10.2211	9.09001	13.1936	7.8004		10.0763
chr7		NM_001177576	Slc25a22	mitochondrial glutamate carrier 1	Slc25a22	Mus musculus adult male tongue cDNA, RIKEN full-length enriched library, clone:2310076D23 product:weakly similar to SOLUTE CARRIER [Homo sapiens], full insert sequence.		9.03961	9.09622	12.6906	9.01368	9.96003
chr10	Q498A7	NM_001003949	Tmem259	membralin	ORF61	SubName: Full=ORF61 protein; Flags: Fragment;	9.26771		11.5727	9.02592		9.95544
chr19	NP_032823	NM_008797	Pcx	pyruvate carboxylase, mitochondrial isoform 2	Pcx	pyruvate carboxylase, mitochondrial isoform 2		6.5123	7.0192	13.1227	11.9726	9.6567
chr17	NP_001139683	NM_001146211	Mrps10	28S ribosomal protein S10, mitochondrial isoform 2	Mrps10	28S ribosomal protein S10, mitochondrial isoform	9.10273	11.7167		8.03048		9.61664
chr19	Q3UMB2	NM_177640	D030056L22Rik	uncharacterized protein C9orf40 homolog	D030056L22Rik	hypothetical protein LOC225995	8.34178		11.3972		8.03346	9.25748
chr11	A2AWT3-2	NM_001098836	Atxn7l3	ataxin-7-like protein 3 isoform a	Atxn7l3	ataxin-7-like protein 3 isoform a	8.80965		10.4483	8.46223		9.24006
chr6	Q3U4W8	NM_013700	Usp5	ubiquitin carboxyl-terminal hydrolase 5 isoform 1	Usp5	ubiquitin carboxyl-terminal hydrolase 5		10.577	9.70208	8.05487	8.40226	9.18405
chr19	NP_001030134	NM_001034962	Sorbs1	sorbin and SH3 domain-containing protein 1 isoform 3	Sorbs1	sorbin and SH3 domain-containing protein 1		6.0007		10.8459	10.4395	9.09537
chr17	Q7TNL5	NM_009358	Ppp2r5d	serine/threonine-protein phosphatase 2A 56 kDa regulatory subunit delta isoform	Ppp2r5d	delta isoform of regulatory subunit B56, protein	11.8599	5.79155	9.54287		8.66507	8.96485
chr11	Q9D024-2	NM_026009	Ccdc47	coiled-coil domain-containing protein 47 precursor	Ccdc47	coiled-coil domain-containing protein 47	7.88013	7.49832	10.892			8.75682
chr16	Q61735-2	NM_010581	Cd47	leukocyte surface antigen CD47 precursor	Cd47	leukocyte surface antigen CD47	7.78656	8.37681	8.53817		9.26045	8.4905
chr3	Q8C7C3	NM_022314	Tpm3	tropomyosin alpha-3 chain isoform Tpm3.13cy	Tpm3	SubName: Full=Putative uncharacterized protein;	5.98927		10.1839		8.67336	8.28218
chrX	Q8R0A5	NM_001029978	Tceal3	transcription elongation factor A protein-like 3	Tceal3	transcription elongation factor A protein-like		8.26763	8.5056		7.50309	8.09211
chr11		NM_001166643	Bcas3	breast carcinoma-amplified sequence 3 homolog isoform b	Bcas3	Mus musculus 10 days embryo whole body cDNA, RIKEN full-length enriched library, clone:2610028P08 product:inferred: Mus musculus K20D4 (K20D4) mRNA, complete cds, full insert sequence.	7.53844		6.92138	9.7546		8.07147
chr17	Q3UMU9	NM_008233	Hdgfl2	hepatoma-derived growth factor-related protein 2 isoform 2	Hdgfrp2	hepatoma-derived growth factor-related protein	5.57476	5.96184	10.7841	9.21783		7.88463
chr11		NM_144828	Ppp1r1b	protein phosphatase 1 regulatory subunit 1B isoform 1	Ppp1r1b	Mus musculus cDNA pooled tissues:(tissue_type=brain,dev_stage=8-12 days neonate,strain=BALB/c),(tissue_type=testis,dev_stage=adult, strain=C57BL/6J), clone:V01X002K09.		4.19958		5.896	12.0026	7.36606
chr7	Q8R359	NM_153580	Ino80e	INO80 complex subunit E	Ino80e	INO80 complex subunit E	5.51368		7.97491	9.72989	6.24142	7.36497
chr11	Q9D2P0	NM_007968	Ewsr1	RNA-binding protein EWS isoform 2	Ewsr1	RNA-binding protein EWS		5.07008	8.02608		8.79473	7.29696
chr2	Q9JM95	NM_016973	St6galnac6	alpha-N-acetylgalactosaminide alpha-2,6-sialyltransferase 6 isoform 1	St6galnac6	RecName: Full=Alpha-N-acetylgalactosaminide alpha-2,6-sialyltransferase 6; EC=2.4.99.-; AltName: Full=GalNAc alpha-2,6-sialyltransferase VI; AltName: Full=ST6GalNAc VI; Short=ST6GalNAcVI; AltName: Full=Sialyltransferase 7F; Short=SIAT7-F;	5.34708		7.16146	10.6206	6.04356	7.29317
chr9	Q62148	NM_009022	Aldh1a2	retinal dehydrogenase 2	Aldh1a2	retinal dehydrogenase 2		4.01435	3.94267	13.6152		7.19074
chr11		NM_009636	Aebp1	adipocyte enhancer-binding protein 1 isoform 2 precursor	Aebp1	Mus musculus aortic carboxypeptidase-like protein ACLP mRNA, complete cds.		3.3443	4.32307	13.7496		7.13899
chr10	Q0VGB8	NM_022027	Syne1	nesprin-1 isoform 2	Syne1	nesprin-1 isoform 2		5.26141		8.73759	6.77868	6.92589
chr19	NP_001123997	NM_001130525	Lzts2	leucine zipper putative tumor suppressor 2	Lzts2	leucine zipper putative tumor suppressor 2	4.60956	4.9445			11.1903	6.91479
chr17	Q924K8	NM_054082	Mta3	metastasis-associated protein MTA3 isoform 2	Mta3	metastasis-associated protein MTA3 isoform 2	5.79102		8.20059	6.5383	7.0498	6.89493
chr6	NP_067389	NM_021414	Ahcyl2	putative adenosylhomocysteinase 3 isoform 1	Ahcyl2	putative adenosylhomocysteinase 3 isoform 1	8.3529	5.32061			6.02175	6.56509
chr11	Q60597-3	NM_010956	Ogdh	2-oxoglutarate dehydrogenase, mitochondrial isoform 3 precursor	Ogdh	2-oxoglutarate dehydrogenase, mitochondrial			7.29079	5.97236	6.26304	6.50873
chr3	P22935	NM_007759	Crabp2	cellular retinoic acid-binding protein 2	Crabp2	cellular retinoic acid-binding protein 2		2.68439	3.33872	13.2905		6.43787
chrX		NR_026976	n/a	n/a	6720401G13Rik	Mus musculus adult male thymus cDNA, RIKEN full-length enriched library, clone:5830467J12 product:unclassifiable, full insert sequence.		5.62009	5.36216	8.07228		6.35151
chr17	NP_796258	NM_177284	Nrxn1	neurexin-1 isoform 2 precursor	Nrxn1	neurexin-1-alpha isoform 2	7.94978	5.99572		6.58857	4.38575	6.22996
chr11	Q3MIA8	NM_001177874	Gps1	COP9 signalosome complex subunit 1 isoform 2	Gps1	COP9 signalosome complex subunit 1 isoform 2	7.35188	6.68048	6.37524	4.10158		6.1273
chr5	Q9Z0H8-2	NM_001039162	Clip2	CAP-Gly domain-containing linker protein 2 isoform b	Clip2	CAP-Gly domain-containing linker protein 2			4.83957	6.75934	6.6603	6.0864
chr17		NR_028515	Snora78		Snora78	Mus musculus small nucleolar RNA, H/ACA box 7 (Snora78), small nucleolar RNA.	3.60128		3.77442		10.8166	6.0641
chr6	P31649	NM_144512	Slc6a13	sodium- and chloride-dependent GABA transporter 2	Slc6a13	sodium- and chloride-dependent GABA transporter	2.04922	3.69102	4.97885	16.8576	2.33141	5.98162
chr5	D3YTR9	NM_001080808	Bicdl1	BICD family-like cargo adapter 1	Ccdc64	SubName: Full=Putative uncharacterized protein Ccdc64;	4.35106		6.17355	6.29171	7.03688	5.9633
chr6	Q8BZ82	NM_172892	Slc13a4	solute carrier family 13 member 4	Slc13a4	solute carrier family 13, member 4		2.84841	3.74536	11.1305		5.90809
chr13	Q8K2C6	NM_178848	Sirt5	NAD-dependent protein deacylase sirtuin-5, mitochondrial	Sirt5	NAD-dependent deacetylase sirtuin-5	6.58761	7.15538		3.52813		5.75704
chr4	Q9JK30-2	NM_001159563	Orc3	origin recognition complex subunit 3 isoform 2	Orc3	origin recognition complex subunit 3 isoform 2			5.82367	5.60467	5.48539	5.63791
chr5		NR_015517	5930412G12Rik		5930412G12Rik	Mus musculus 13 days embryo forelimb cDNA, RIKEN full-length enriched library, clone:5930412G12 product:unclassifiable, full insert sequence.		6.82735	7.00899	5.73159	2.6047	5.54316
chr13	Q543C5	NM_008760	Ogn	mimecan precursor	Ogn	mimecan precursor		3.60987	3.13075	9.534		5.42487
chr5	A2RTL5	NM_025438	Rsrc2	arginine/serine-rich coiled-coil protein 2 isoform 2	Rsrc2	arginine/serine-rich coiled-coil protein 2	3.80405			7.94151	4.50094	5.4155
chr15		NM_033371	Ppp1r16a	protein phosphatase 1 regulatory subunit 16A	Ppp1r16a	Mus musculus NOD-derived CD11c +ve dendritic cells cDNA, RIKEN full-length enriched library, clone:F630110A03 product:protein phosphatase 1, regulatory (inhibitor) subunit 16A, full insert sequence.	3.4503	7.05737		5.67888		5.39552
chr8		NR_028428	2610005L07Rik		2610005L07Rik	Mus musculus adult male tongue cDNA, RIKEN full-length enriched library, clone:2310006C03 product:cadherin 11, full insert sequence.	4.6862		6.27982	5.07691		5.34764
chr5	P35235	NM_011202	Ptpn11	tyrosine-protein phosphatase non-receptor type 11 isoform a	Ptpn11	tyrosine-protein phosphatase non-receptor type			4.91656	4.78161	6.09276	5.26364
chr7	Q8BH97	NM_026555	Rcn3	reticulocalbin-3 precursor	Rcn3	reticulocalbin-3 precursor		3.07004	3.10016	9.3594		5.17653
chr6	Q3TX57	NM_007743	Col1a2	collagen alpha-2(I) chain preproprotein	Col1a2	collagen alpha-2(I) chain precursor		2.35371	4.13865	8.99116		5.16117
chr2	Q921M4	NM_001080968	Golga2	golgin subfamily A member 2 isoform b	Golga2	Golgin subfamily A member 2 isoform b	6.69464	5.38449	4.49187		3.58082	5.03795
chrX	Q91WF0	NM_181516	Taz	tafazzin isoform 2	Taz	tafazzin isoform 2		3.68711		7.66056	3.72175	5.02314
chr7	NP_034644	NM_010514	Igf2	insulin-like growth factor II isoform 1 precursor	Igf2	insulin-like growth factor II isoform 1		2.21488	2.93192	9.91637		5.02106
chr15	Q80U72-2	NM_134089	Scrib	protein scribble homolog isoform 1	Scrib	protein scribble homolog		6.92107	3.60197	4.78362	4.71046	5.00428
chr13	Q9QZQ8-2	NM_001159514	H2afy	core histone macro-H2A.1 isoform 3	H2afy	core histone macro-H2A.1 isoform 3	3.55815		6.95243	5.15743	4.24934	4.97934
chr4	A2AKB4	NM_001081172	Frmpd1	FERM and PDZ domain-containing protein 1	Frmpd1	FERM and PDZ domain-containing protein 1		4.40507	6.1413	4.28317		4.94318
chr12	P0C8B4	NM_001142938	Gon7	EKC/KEOPS complex subunit GON7	Moap1	hypothetical protein LOC100233175 isoform 1	3.6706	4.95138	5.11524	5.6858		4.85576
chr4	Q8CCJ3	NM_026194	Ufl1	E3 UFM1-protein ligase 1	1810074P20Rik	E3 UFM1-protein ligase 1		3.01785	5.30124	4.81976	6.2558	4.84866
chr3	Q80X50-2	NM_001165985	Ubap2l	ubiquitin-associated protein 2-like isoform 5	Ubap2l	ubiquitin-associated protein 2-like isoform 5	4.47507	5.39709			4.60953	4.82723
chr2	Q543C6	NM_010710	Lhx2	LIM/homeobox protein Lhx2 isoform a	Lhx2	LIM/homeobox protein Lhx2		2.6597	2.39554	9.41633		4.82386
chr17		n/a	n/a	n/a	4930506C21Rik	Mus musculus adult male testis cDNA, RIKEN full-length enriched library, clone:4930506C21 product:unclassifiable, full insert sequence.	4.36363	5.09175	4.97247			4.80928
chr7	Q69Z98-4	NM_029426	Brsk2	serine/threonine-protein kinase BRSK2 isoform alpha	Brsk2	BR serine/threonine-protein kinase 2 isoform		4.21833	5.42499	4.72163		4.78832
chr5	Q9CZV5	NM_028150	Supt7l	STAGA complex 65 subunit gamma	Supt7l	STAGA complex 65 subunit gamma	3.47641			5.74388	4.8081	4.67613
chrX	Q3V2H3	NM_001110311	Snx12	sorting nexin-12 isoform 2	Snx12	sorting nexin-12 isoform 2			5.23298	4.92253	3.81369	4.6564
chr4	Q548M4	NM_001039176	Elovl1	elongation of very long chain fatty acids protein 1 isoform 1	Elovl1	elongation of very long chain fatty acids		2.7911	4.05702	7.05743		4.63518
chr7	Q60929-2	NM_001033713	Mef2a	myocyte-specific enhancer factor 2A isoform a	Mef2a	myocyte-specific enhancer factor 2A		5.01672		4.88271	3.97861	4.62601
chr6	Q8R2K5	NM_001010930	Mrps33	28S ribosomal protein S33, mitochondrial isoform 2	Mrps33	28S ribosomal protein S33, mitochondrial isoform			3.36973	6.62245	3.83939	4.61052
chr16	Q99K01	NM_053181	Pdxdc1	pyridoxal-dependent decarboxylase domain-containing protein 1 isoform 1	Pdxdc1	pyridoxal-dependent decarboxylase		4.636	5.18262	4.05725	4.46031	4.58404
chr9	Q8CFZ6	NM_011606	Clec3b	tetranectin precursor	Clec3b	tetranectin precursor		3.21317	3.00992	7.47952		4.56754
chr12	NP_473422	NM_054081	Mta1	metastasis-associated protein MTA1 isoform 1	Mta1	metastasis-associated protein MTA1	4.46106	3.15233	5.97468	4.45662		4.51117
chr11	B2RY59	NM_001013414	Neurl4	neuralized-like protein 4 isoform 1	Neurl4	neuralized-like protein 4	4.15743		6.67839	2.55145		4.46242
chr7	Q8VDM6-2	NM_144922	Hnrnpul1	heterogeneous nuclear ribonucleoprotein U-like protein 1 isoform 1	Hnrnpul1	RecName: Full=Heterogeneous nuclear ribonucleoprotein U-like protein 1;		4.22715	5.10716	4.02711		4.45381
chr13	B2RTM0	NM_153173	Hist1h4h	histone H4	Hist1h4h	histone H4	6.24891	2.95947	4.04921	4.44486		4.42561
chr3		NM_138744	Ssx2ip	afadin- and alpha-actinin-binding protein isoform a	Ssx2ip	Mus musculus afadin- and alpha-actinin-binding protein ADIP mRNA, complete cds.		4.08557	4.10471	4.69808	4.78127	4.41741
chr13	B2RTM0	NM_178211	Hist1h4k	histone H4	Hist1h4k	histone H4	5.60909	4.57265	3.02376			4.40183
chr11	Q3TVI4	NM_027658	Hexim2	protein HEXIM2	Hexim2	protein HEXIM2	3.69708	4.7628	3.24388		5.81513	4.37972
chr13	P20722	NM_007556	Bmp6	bone morphogenetic protein 6 preproprotein	Bmp6	bone morphogenetic protein 6 precursor		2.40803	2.99291	7.62308		4.34134
chr2	Q9CPQ6	NM_001164772	Fbxw2	F-box/WD repeat-containing protein 2 isoform 4	Fbxw2	F-box/WD repeat-containing protein 2 isoform 4	2.66033	6.31769	3.54882	3.82474	4.99698	4.26971
chr2	Q543W3	NM_009378	Thbd	thrombomodulin precursor	Thbd	thrombomodulin precursor		2.16507	3.25851	7.31581		4.24646
chr9	Q3TW04	NM_025857	Aagab	alpha- and gamma-adaptin-binding protein p34	Aagab	alpha- and gamma-adaptin-binding protein p34	4.9264	3.60508	6.64483	3.61777	2.01649	4.16211
chr5	Q3UFC0	NM_001199244	Kcnip4	Kv channel-interacting protein 4 isoform 5	Kcnip4	Kv channel-interacting protein 4 isoform 5	3.12421	4.03794			5.1112	4.09112
chr9	Q58EU7	NM_011254	Rbp1	retinol-binding protein 1	Rbp1	retinol-binding protein 1	2.24464	3.53792	2.29375	8.17185		4.06204
chr11	Q5SPX3	NM_027859	Rnf215	RING finger protein 215 precursor	Rnf215	RecName: Full=RING finger protein 215;		3.81167		4.29204	4.06233	4.05535
chr12	NP_996893	NM_207010	Mdga2	MAM domain-containing glycosylphosphatidylinositol anchor protein 2 isoform B precursor	Mdga2	MAM domain-containing	3.51572	4.80854	3.75152		3.99234	4.01703
chr8		NM_027171	Camsap3	calmodulin-regulated spectrin-associated protein 3 isoform 2	2310057J16Rik	Mus musculus adult male tongue cDNA, RIKEN full-length enriched library, clone:2310057J16 product:hypothetical protein, full insert sequence.		4.01102		3.59617	4.43045	4.01255
chr2	B0R0C0	NM_011012	Oprl1	nociceptin receptor isoform 1	Oprl1	SubName: Full=Opioid receptor-like 1; SubName: Full=Opioid receptor-like 1, isoform CRA_i;			3.50639	4.65426	3.87085	4.0105
chr13		NR_034043	Snora47		Snora47	Mus musculus small nucleolar RNA, H/ACA box 47 (Snora47), small nucleolar RNA.	3.60128	4.79679			3.60553	4.0012
chr18	Q8R3N6	NM_153552	Thoc1	THO complex subunit 1	Thoc1	THO complex subunit 1	3.21215	4.41994	4.35156			3.99455
chr7	Q5PR72	NM_001008548	Pde2a	cGMP-dependent 3',5'-cyclic phosphodiesterase isoform PDE2A3	Pde2a	cGMP-dependent 3',5'-cyclic phosphodiesterase	4.03401		4.4208	3.4939		3.9829
chr10	Q80TL7-2	NM_153395	Mon2	protein MON2 homolog isoform 3	Mon2	protein MON2 homolog isoform 3	2.14362	6.39809	4.53406	2.80279		3.96964
chr13	Q3U1C4	NM_029279	Secisbp2	selenocysteine insertion sequence-binding protein 2 isoform 1	Secisbp2	SubName: Full=MCG1271; SubName: Full=Putative uncharacterized protein; SubName: Full=SECIS binding protein 2;	3.05598	4.42081		4.41266		3.96315
chr10	O55240	NM_134006	Rdh5	11-cis retinol dehydrogenase precursor	Rdh5	retinol dehydrogenase 5		5.34383		3.71971	2.72901	3.93085
chr2	NP_033953	NM_009823	Cbfa2t2	protein CBFA2T2 isoform 2	Cbfa2t2	protein CBFA2T2 isoform 2	2.56315		4.23293	2.36006	6.53129	3.92186
chr4	NP_001076811	NM_001083342	Disp3	protein dispatched homolog 3	Ptchd2	patched domain-containing protein 2		3.04548	3.48945	5.20815		3.91436
chr19	Q64704-3	NM_001025307	Stx3	syntaxin-3 isoform B	Stx3	syntaxin-3 isoform C	4.52579	4.56672	3.468	3.09149		3.913
chr1	Q3TEW6	NM_001083897	Mpzl1	myelin protein zero-like protein 1 isoform a precursor	Mpzl1	myelin protein zero-like protein 1 isoform a	3.78175		5.02317		2.91889	3.90794
chr5	Q8K4F6	NM_145414	Nsun5	probable 28S rRNA (cytosine-C(5))-methyltransferase	Nsun5	putative methyltransferase NSUN5		3.8568		3.81725	4.0396	3.90455
chr19		NM_011262	Dpf2	zinc finger protein ubi-d4 isoform 2	Dpf2	zinc finger protein ubi-d4	4.03982		4.22927		3.31359	3.86089
chr18		NM_001037859	Csf1r	macrophage colony-stimulating factor 1 receptor precursor	Csf1r	Mus musculus adult male liver cDNA, RIKEN full-length enriched library, clone:1300008N20 product:colony stimulating factor 1 receptor, full insert sequence.	3.23621	2.15567	4.03506	5.98014		3.85177
chrX	Q6P3Y5-3	NM_001166649	Zfp280c	zinc finger protein 280C isoform 2	Zfp280c	zinc finger protein 280C isoform 2	3.24736	5.19863	3.01128			3.81909
chr14	Q6GTE9	NM_011849	Nek4	serine/threonine-protein kinase Nek4 isoform 1	Nek4	serine/threonine-protein kinase Nek4		5.33952	2.64102	2.2251	4.9355	3.78529
chr2	NP_954693	NM_199223	Rtn4rl2	reticulon-4 receptor-like 2 precursor	Rtn4rl2	reticulon-4 receptor-like 2 precursor		2.2213	2.06158	7.06531		3.78273
chr7	O35566	NM_009842	Cd151	CD151 antigen	Cd151	CD151 antigen	3.05146	4.40203	5.10095	2.5734		3.78196
chr2	Q3U223	NM_008091	Gata3	trans-acting T-cell-specific transcription factor GATA-3	Gata3	trans-acting T-cell-specific transcription	2.81799			4.31649	4.149	3.76116
chr6	NP_084173	NM_029897	C2cd5	C2 domain-containing protein 5 isoform 2	5730419I09Rik	hypothetical protein LOC74741 isoform 2	3.15443	5.12481		4.18361	2.43139	3.72356
chr9	Q8VDI9	NM_133981	Alg9	alpha-1,2-mannosyltransferase ALG9	Alg9	alpha-1,2-mannosyltransferase ALG9	3.74473	3.40151	5.29786	2.23748		3.6704
chr15	NP_958794	NM_201392	Plec	plectin isoform 1hij	Plec	plectin isoform 1hij		3.38528		2.75135	4.80316	3.6466
chr16	Q99MS3-2	NM_033564	Mpv17l	mpv17-like protein isoform 1	Mpv17l	RecName: Full=Mpv17-like protein; Short=M-LP;	2.01083	6.01764	2.68125		3.86706	3.6442
chr6	NP_001077391	NM_001083922	Wbp1	WW domain-binding protein 1 isoform 2	Wbp1	WW domain-binding protein 1 isoform 2	2.22277	3.79966	4.68042			3.56762
chr19		NM_023740	Zdhhc16	probable palmitoyltransferase ZDHHC16 precursor	Zdhhc16	Mus musculus Abl-philin 2 mRNA, complete cds.	2.77405			3.28062	4.52367	3.52611
chr12	O88508	NM_007872	Dnmt3a	DNA (cytosine-5)-methyltransferase 3A isoform 1	Dnmt3a	DNA (cytosine-5)-methyltransferase 3A isoform 1	4.01283	4.9751	2.17472	3.30871	3.10926	3.51612
chr14	NP_001074846	NM_001081377	Pcdh9	protocadherin-9 isoform a precursor	Pcdh9	protocadherin-9	2.66671	4.13238	3.71542	4.25713	2.70419	3.49517
chr7	Q99N50-5	NM_031394	Sytl2	synaptotagmin-like protein 2 isoform 3	Sytl2	synaptotagmin-like protein 2 isoform 3	2.96969	3.53976	3.90581		3.4406	3.46396
chr4	Q3ZB23	NM_009523	Wnt4	protein Wnt-4 precursor	Wnt4	protein Wnt-4 precursor		2.35285	2.22165	5.72424		3.43291
chr10		NM_183254	Fam229b	protein FAM229B	1700025K23Rik	Mus musculus adult male testis cDNA, RIKEN full-length enriched library, clone:1700025K23 product:hypothetical protein, full insert sequence.	2.01578			2.3003	5.97208	3.42939
chr11		NM_001002764	Smg6	telomerase-binding protein EST1A	Smg6	Mus musculus 0 day neonate kidney cDNA, RIKEN full-length enriched library, clone:D630011B02 product:hypothetical protein, full insert sequence.		3.2349		4.32419	2.70184	3.42031
chr2	Q76KF0-6	NM_199240	Sema6d	semaphorin-6D isoform Sema6D-6 precursor	Sema6d	semaphorin-6D isoform 6	2.50406	3.47378	4.27343			3.41709
chr8	Q8BKV0-2	NM_023689	Spock3	testican-3 isoform 1 precursor	Spock3	testican-3 precursor	2.75367	3.75288	3.66568		3.49247	3.41617
chr3	Q69ZV4	NM_138744	Ssx2ip	afadin- and alpha-actinin-binding protein isoform a	Ssx2ip	afadin- and alpha-actinin-binding protein	2.36056	4.43006		2.85546	3.99795	3.41101
chr17	D3YZB4	NM_001113352	Synj2	synaptojanin-2 isoform b	Synj2	synaptojanin-2 isoform b	2.81107	3.88385	2.84675	4.02246		3.39103
chr14	Q8CBY1	NM_001037221	Samd4	protein Smaug homolog 1 isoform 1	Samd4	protein Smaug homolog 1 isoform 1	2.71121	3.86776	3.57561			3.38486
chr7	Q6PB97-3	NM_172748	Fbxl19	F-box/LRR-repeat protein 19	Fbxl19	F-box/LRR-repeat protein 19		3.00985	4.52883		2.59196	3.37688
chr13	Q05BF4	NM_001039389	Wdr37	WD repeat-containing protein 37 isoform b	Wdr37	WD repeat-containing protein 37 isoform b	2.80576	2.18796	3.6606	4.81208		3.3666
chr7	NP_776128	NM_173767	Insc	protein inscuteable homolog	Insc	protein inscuteable homolog	2.78868	2.63698	5.27252	3.65692	2.43079	3.35718
chr13	B2RTM0	NM_178210	Hist1h4j	histone H4	Hist1h4j	histone H4	4.70065		2.17744	3.17984		3.35264
chr7	Q9DAK8-2	NM_001162974	Lrrc51	leucine-rich repeat-containing protein 51 isoform 2	Lrrc51	leucine-rich repeat-containing protein 51	3.13846			4.64701	2.26747	3.35098
chr17	Q6P5D3	NM_001163759	Dhx57	putative ATP-dependent RNA helicase DHX57 isoform 1	Dhx57	putative ATP-dependent RNA helicase DHX57	3.02389	3.8413	2.79507		3.71968	3.34499
chr8	Q9DC47	NM_001039967	Zfp869	zinc finger protein 869	Zfp869	zinc finger protein 869	2.62519	2.85839		4.55061		3.34473
chr3	Q9R0H2	NM_001163522	Emcn	endomucin isoform 1 precursor	Emcn	endomucin isoform 1		2.6878	3.81443	3.27965	3.53552	3.32935
chr19	Q99KQ9	NM_019861	Ctsf	cathepsin F precursor	Ctsf	SubName: Full=Ctsf protein; Flags: Fragment;			2.95191	3.48626	3.54927	3.32915
chr18	Q8K4Q8	NM_130449	Colec12	collectin-12	Colec12	collectin-12		2.13694	2.51709	5.32691		3.32698
chr17	Q6RUT9	NM_011930	Clcn7	H(+)/Cl(-) exchange transporter 7 isoform 1	Clcn7	H(+)/Cl(-) exchange transporter 7	2.1432		4.94674		2.78695	3.2923
chr12	Q9CQX0	NM_026580	Otub2	ubiquitin thioesterase OTUB2 isoform 2	Otub2	ubiquitin thioesterase OTUB2 isoform 2	2.55378	3.17175	2.85333	4.52545		3.27608
chr4		n/a	n/a	n/a	4930455G09Rik	Mus musculus adult male testis cDNA, RIKEN full-length enriched library, clone:4930455G09 product:unclassifiable, full insert sequence.		2.29352		4.01844	3.44788	3.25328
chr11	Q69ZS5	NM_010148	Epn2	epsin-2 isoform 2	Epn2	epsin-2	2.78253	2.7759			4.16036	3.2396
chr5	Q6GQS5	NM_172424	Med13l	mediator of RNA polymerase II transcription subunit 13-like isoform 2	Med13l	mediator of RNA polymerase II transcription			3.48705	3.46244	2.716	3.22183
chr11	Q640N1	NM_009636	Aebp1	adipocyte enhancer-binding protein 1 isoform 2 precursor	Aebp1	adipocyte enhancer-binding protein 1 precursor		2.34581		4.65252	2.65778	3.2187
chr5	Q8C8K9	NM_001122733	Kit	mast/stem cell growth factor receptor Kit isoform 1 precursor	Kit	mast/stem cell growth factor receptor isoform 1		2.80995		4.64964	2.16635	3.20865
chr14	Q8BGD0-2	NM_146051	3830406C13Rik	uncharacterized protein C3orf14 homolog isoform 1	3830406C13Rik	hypothetical protein LOC218734 isoform 1	2.92848			3.07045	3.61979	3.20624
chr12	D3YXS0	NM_011112	Papola	poly(A) polymerase alpha isoform 1	Papola	SubName: Full=Putative uncharacterized protein Papola;	3.22657		3.14728	3.19073		3.18819
chr2	A2AQK8	NM_001018042	Sp3	transcription factor Sp3 isoform 1	Sp3	transcription factor Sp3 isoform 2		3.09621		3.77268	2.6947	3.18786
chr3	B7ZNR0	NM_007899	Ecm1	extracellular matrix protein 1 isoform 1 precursor	Ecm1	extracellular matrix protein 1 precursor			2.67084	3.64951	3.19046	3.17027
chr9	NP_666115	NM_146003	Senp6	sentrin-specific protease 6 isoform 2	Senp6	sentrin-specific protease 6		2.27784	3.45489	4.29163	2.60359	3.15699
chr8	B7ZNJ7	NM_173744	Tdrp	testis development-related protein	2610019F03Rik	hypothetical protein LOC72148	4.72598			2.28665	2.41144	3.14136
chr10	Q8BTC1	NM_001135569	1190007I07Rik	uncharacterized protein C12orf73 homolog precursor	1190007I07Rik	hypothetical protein LOC544717 precursor		5.18026	2.05878		2.16988	3.13631
chr15	Q3TDA7	NM_011862	Pacsin2	protein kinase C and casein kinase substrate in neurons protein 2	Pacsin2	protein kinase C and casein kinase substrate in	3.15797		2.20069		4.03979	3.13282
chr4	Q8R239	NM_144905	Tmem268	transmembrane protein 268	6330416G13Rik	transmembrane protein C9orf91 homolog	3.11582			3.14699	3.1333	3.13204
chr10	P15806	NM_001164149	Tcf3	transcription factor E2-alpha isoform 3	Tcf3	transcription factor E2-alpha isoform 3			2.91129	3.71436	2.7426	3.12275
chr12	Q3TC20	NM_183154	Zfyve1	zinc finger FYVE domain-containing protein 1	Zfyve1	zinc finger FYVE domain-containing protein 1	3.44937			3.21044	2.70411	3.12131
chr1	Q3V252	NM_009352	Terf1	telomeric repeat-binding factor 1 isoform 1	Terf1	telomeric repeat-binding factor 1	2.6023		3.41287	3.3066		3.10726
chr3	Q4JK59-2	NM_001040400	Tet2	methylcytosine dioxygenase TET2 isoform 1	Tet2	methylcytosine dioxygenase TET2			2.35068	3.37003	3.59694	3.10588
chr4	P56469	NM_007745	Cort	cortistatin preproprotein	Cort	cortistatin precursor		2.86086	2.09031	4.2964		3.08252
chr16	Q8K0L9	NM_019778	Zbtb20	zinc finger and BTB domain-containing protein 20 isoform L	Zbtb20	zinc finger and BTB domain-containing protein 20	3.88408	3.32502	2.03068			3.07993
chr13		NM_028493	Rhobtb3	rho-related BTB domain-containing protein 3	Rhobtb3	Mus musculus adult male testis cDNA, RIKEN full-length enriched library, clone:1700040C17 product:hypothetical BTB/POZ domain/Prenyl group binding site (CAAX box) containing protein, full insert sequence.		2.4437		4.48509	2.28347	3.07075
chr7	Q7TQJ8	NM_207212	Wtip	Wilms tumor protein 1-interacting protein	Wtip	Wilms tumor protein 1-interacting protein			2.79034	4.12602	2.27731	3.06456
chr11	A2BFB0	NM_011550	Mlx	max-like protein X isoform gamma	Mlx	max-like protein X isoform gamma		3.24963	3.32523		2.60655	3.06047
chr11		NM_001081434	Osbpl7	oxysterol-binding protein-related protein 7 isoform 2	Osbpl7	Mus musculus adult male testis cDNA, RIKEN full-length enriched library, clone:4933437E18 product:OSBP-RELATED PROTEIN 7 homolog [Homo sapiens], full insert sequence.	2.22937	3.15762	3.19998	3.65409		3.06027
chr11	Q3U0I5	NM_010716	Lig3	DNA ligase 3 isoform a	Lig3	SubName: Full=Putative uncharacterized protein;	2.13838			3.59212	3.44256	3.05769
chr3	Q52KE7	NM_019937	Ccnl1	cyclin-L1	Ccnl1	cyclin-L1	2.77964	4.11673		2.27055		3.05564
chr8	NP_001020748	NM_001025577	Maf	transcription factor Maf	Maf	transcription factor Maf		2.32061	2.27453	5.55418	2.06034	3.05241
chr9		NM_153762	Rnf26	E3 ubiquitin-protein ligase RNF26	Rnf26	ring finger protein 26	2.6699	3.052	3.39604			3.03931
chr17	Q8K1Y2	NM_029239	Prkd3	serine/threonine-protein kinase D3 isoform 2	Prkd3	serine/threonine-protein kinase D3 isoform 2		4.54003		2.22294	2.34777	3.03691
chr17	Q3U325	NM_028162	Tbc1d5	TBC1 domain family member 5 isoform b	Tbc1d5	TBC1 domain family member 5		4.02544	2.8931		2.15584	3.02479
chr3	NP_835734	NM_054045	Hist2h3c2	histone H3.2	Hist2h3c2-ps	histone H3.2	3.44044		2.33377	3.2944		3.02287
chr2	Q9CQS3	NM_026271	Fibin	fin bud initiation factor homolog precursor	Fibin	fin bud initiation factor homolog precursor		2.23304		4.45681	2.3596	3.01648
chr1	NP_080463	NM_026187	Ankzf1	ankyrin repeat and zinc finger domain-containing protein 1 isoform 1	Ankzf1	ankyrin repeat and zinc finger domain-containing			2.3959	3.8607	2.74455	3.00038
chr15	NP_001036192	NM_001042727	Rarg	retinoic acid receptor gamma isoform 2	Rarg	retinoic acid receptor gamma isoform 2			2.98922	3.81001	2.16896	2.9894
chr5	Q8VEK2	NM_146002	Rhbdd2	rhomboid domain-containing protein 2	Rhbdd2	rhomboid domain-containing protein 2	3.60443	2.37358	2.60667	2.68766	3.63128	2.98072
chr1	Q91Y52	NM_009283	Stat1	signal transducer and activator of transcription 1 isoform 2	Stat1	signal transducer and activator of transcription			4.35549	2.52445	2.04837	2.9761
chr7		NR_033336	Snora23		Snora23	Mus musculus small nucleolar RNA, H/ACA box 23 (Snora23), small nucleolar RNA.	4.11609	2.74125			2.06048	2.97261
chr9	Q8C1H8	NM_133733	Clmp	CXADR-like membrane protein precursor	9030425E11Rik	adipocyte adhesion molecule precursor		2.37297	4.19701	2.33102		2.967
chr3	D3YUS4	NM_026677	Rab13	ras-related protein Rab-13 isoform 1	Rab13	ras-related protein Rab-13	2.61624	3.04009	3.22981			2.96205
chr4	NP_001156491	NM_001163019	A430005L14Rik	UPF0688 protein C1orf174 homolog isoform 2	A430005L14Rik	hypothetical protein LOC97159 isoform 2	2.59861	3.59536	2.40661		3.21891	2.95487
chr19		NM_001081319	Ric1	RAB6A-GEF complex partner protein 1	C030046E11Rik	protein RIC1 homolog		3.51503	2.67706	2.65757		2.94989
chr12	O54926-2	NM_001161737	Siva1	apoptosis regulatory protein Siva isoform 2	Siva1	apoptosis regulatory protein Siva isoform 2		2.60305	2.40282	3.81453		2.94013
chr4	Q3TRI4	NM_030722	Pum1	pumilio homolog 1 isoform 1	Pum1	pumilio homolog 1 isoform 1			3.61893	2.7917	2.38554	2.93206
chr2	Q3U5L4	NM_011355	Spi1	transcription factor PU.1	Sfpi1	transcription factor PU.1		2.88523	2.94296	2.97693	2.8916	2.92418
chr5	Q3TJ55	NM_007941	Stx2	syntaxin-2 isoform a	Stx2	syntaxin-2			3.07297	3.5678	2.09789	2.91289
chr9	Q7TMK9	NM_019796	Syncrip	heterogeneous nuclear ribonucleoprotein Q isoform 2	Syncrip	heterogeneous nuclear ribonucleoprotein Q	2.83988	2.32963	4.2936	2.17652		2.90991
chr2		NM_001162417	Myef2	myelin expression factor 2 isoform 1	Myef2	myelin expression factor 2 isoform 2	2.43985	3.40035	2.86644			2.90221
chr4	Q3TJB1	NM_026670	Zmym1	zinc finger MYM-type protein 1	Zmym1	zinc finger MYM-type protein 1	2.2792	2.86931	3.11767	3.32181		2.897
chr5	Q8CHE8	NM_011995	Pclo	protein piccolo isoform 1	Pclo	SubName: Full=MKIAA0559 protein; Flags: Fragment;			2.34288	3.36141	2.98119	2.89516
chr4	Q8C739	NM_173426	Fam110b	protein FAM110B	Fam110b	hypothetical protein LOC242297		2.04504	3.18202	3.45666		2.89457
chr2	Q6ZPR4	NM_175462	Kcnt1	potassium channel subfamily T member 1 isoform 1	Kcnt1	potassium channel subfamily T member 1 isoform	2.47462	2.35911	2.54816	4.17988		2.89044
chr1	Q6PGA0-2	NM_144814	Rcor3	REST corepressor 3 isoform a	Rcor3	RecName: Full=REST corepressor 3;			2.10027	3.42357	3.10773	2.87719
chr10	Q8CFE4	NM_198021	Scyl2	SCY1-like protein 2 isoform 1	Scyl2	SCY1-like protein 2		3.40524		3.03244	2.17862	2.8721
chr1	B7ZNP0	NM_001039644	Edem3	ER degradation-enhancing alpha-mannosidase-like protein 3 isoform 1 precursor	Edem3	ER degradation-enhancing alpha-mannosidase-like			2.89739	3.30284	2.3941	2.86478
chr9	Q91VL0	NM_016787	Bnip2	BCL2/adenovirus E1B 19 kDa protein-interacting protein 2 isoform beta	Bnip2	BCL2/adenovirus E1B 19 kDa protein-interacting		2.19794	2.16194	4.09085	2.94838	2.84978
chr7	Q9D6T0-2	NM_001163684	Nosip	nitric oxide synthase-interacting protein isoform 2	Nosip	nitric oxide synthase-interacting protein	2.56616	3.59785		2.37515		2.84639
chr4	A2A7S8-4	NM_001033189	C77080	uncharacterized protein KIAA1522 isoform a	C77080	hypothetical protein LOC97130	2.24697		3.30004	2.97467		2.84056
chr6	Q61121	NM_001167699	Gpr19	probable G-protein coupled receptor 19 isoform a	Gpr19	probable G-protein coupled receptor 19 isoform			2.5604	3.35941	2.60174	2.84052
chr9	NP_001171639	NM_001184710	Tfdp2	transcription factor Dp-2 isoform C	Tfdp2	transcription factor Dp-2 isoform C	2.13446	2.561	3.79232			2.82926
chr12	Q8VHT4	NR_027677	E2f6		E2f6	transcription factor E2F6	2.08531	3.18695	3.33929	2.80288	2.72913	2.82871
chr17		NM_172619	Adamts10	A disintegrin and metalloproteinase with thrombospondin motifs 10 isoform 1 preproprotein	Adamts10	Mus musculus zinc metallopeptidase (Adamts10) mRNA, partial cds.			3.1094	3.17799	2.17944	2.82228
chr4	Q921H9	NM_027250	Coa7	cytochrome c oxidase assembly factor 7	2010305A19Rik	hcp beta-lactamase-like protein C1orf163	2.12041	3.23102	2.98685		2.92113	2.81485
chr4	Q505N6	NM_009097	Rps6ka1	ribosomal protein S6 kinase alpha-1 isoform a	Rps6ka1	ribosomal protein S6 kinase alpha-1		4.18719		2.12212	2.09822	2.80251
chr10	Q5DTI7	NM_019725	Tle2	transducin-like enhancer protein 2 isoform 1	Tle2	SubName: Full=MKIAA4188 protein; Flags: Fragment;		2.121	3.60711	2.1083	3.29838	2.7837
chr8	Q8BI72	NM_172407	Cdkn2aip	CDKN2A-interacting protein	Cdkn2aip	RecName: Full=CDKN2A-interacting protein; AltName: Full=Collaborator of ARF;		2.66664	2.52202	3.15518		2.78128
chr3	Q545T0	NM_007802	Ctsk	cathepsin K preproprotein	Ctsk	cathepsin K precursor		2.36044	3.38036	2.58066		2.77382
chr7	Q3TQR0-2	NM_145583	Pgap2	post-GPI attachment to proteins factor 2	Pgap2	post-GPI attachment to proteins factor 2	2.66775	2.53316		3.11267		2.77119
chr11	Q5SX74	NM_001136076	P4ha2	prolyl 4-hydroxylase subunit alpha-2 isoform 1 precursor	P4ha2	prolyl 4-hydroxylase subunit alpha-2 isoform 1	2.47337		2.51696	3.31524		2.76852
chr5	Q3TDW6	NM_001201415	Apbb2	amyloid beta A4 precursor protein-binding family B member 2 isoform 4	Apbb2	amyloid beta A4 precursor protein-binding family	2.87578	2.15972			3.26802	2.76784
chr3	D3YY34	NM_001165954	Phc3	polyhomeotic-like protein 3 isoform 1	Phc3	SubName: Full=Putative uncharacterized protein Phc3;		2.59087	2.43238	3.22657		2.74994
chr2	A2AFK4	NM_001083329	Mtg2	mitochondrial ribosome-associated GTPase 2	Gtpbp5	GTP binding protein 5	2.68536	3.05345			2.50413	2.74765
chr4	Q8CJ28	NM_001164052	Pik3cd	phosphatidylinositol 4,5-bisphosphate 3-kinase catalytic subunit delta isoform isoform a	Pik3cd	phosphatidylinositol-4,5-bisphosphate 3-kinase			2.11432	3.53816	2.58898	2.74715
chr13	D3YYA1	NR_003568	Gpr137b-ps		Gpr137b-ps	SubName: Full=Putative uncharacterized protein ENSMUSP00000106231;	2.51207	3.05459		2.61118		2.72595
chr6	NP_001153007	NM_001159535	Cacna1c	voltage-dependent L-type calcium channel subunit alpha-1C isoform 4	Cacna1c	voltage-dependent L-type calcium channel subunit	2.90441	2.18154		3.09033		2.72543
chr11	A2A7Y2	NM_009180	St6galnac2	alpha-N-acetylgalactosaminide alpha-2,6-sialyltransferase 2	St6galnac2	alpha-N-acetylgalactosaminide			2.41484	2.60179	3.12532	2.71398
chr7		NM_026498	Mrps11	28S ribosomal protein S11, mitochondrial	Mrps11	Mus musculus MRPS11 mRNA for mitochondrial ribosomal protein S11, partial cds.	2.74285		2.11504	3.24313	2.75119	2.71305
chr2	B1AQN1	NM_021464	Ptprt	receptor-type tyrosine-protein phosphatase T isoform d precursor	Ptprt	receptor-type tyrosine-protein phosphatase T	2.93019	2.80318	2.38289			2.70542
chr14		NM_019519	Rabggta	geranylgeranyl transferase type-2 subunit alpha	Rabggta	Mus musculus strain C57BL/6J RAB geranylgeranyl transferase alpha subunit (Rabggta) mRNA, complete cds, alternatively spliced.		2.01706	3.06277		3.03266	2.70416
chr3	B9EI85	NM_178215	Hist2h3b	histone H3.2	Hist2h3b	histone H3.2	3.351	2.12314	2.44898	2.89139		2.70363
chr11	Q7TN98-5	NM_026252	Cpeb4	cytoplasmic polyadenylation element-binding protein 4 isoform 1	Cpeb4	cytoplasmic polyadenylation element-binding	3.24116	2.76435	2.10105			2.70219
chr3	Q3U048	NM_001003912	Arhgef11	rho guanine nucleotide exchange factor 11	Arhgef11	rho guanine nucleotide exchange factor 11	2.59688	2.26158	3.1076	2.80629		2.69309
chr9	B0QZU8	NM_133984	Hemk1	hemK methyltransferase family member 1	Hemk1	hemK methyltransferase family member 1		2.93217		2.55729	2.58252	2.69066
chr2	Q32MF3	NM_023116	Cacnb2	voltage-dependent L-type calcium channel subunit beta-2 isoform 1	Cacnb2	voltage-dependent L-type calcium channel subunit	2.07529		2.65362	3.3299		2.68627
chr14	Q9CR58	NM_026232	Slc25a30	kidney mitochondrial carrier protein 1	Slc25a30	kidney mitochondrial carrier protein 1		2.81231	2.81355	2.57633	2.50647	2.67717
chr3	Q80VL1	NM_028307	Tdrkh	tudor and KH domain-containing protein	Tdrkh	tudor and KH domain-containing protein	2.64053	2.37287	2.68421	2.42072	3.2117	2.66601
chr2	Q8BGQ3	NM_021527	Mkks	McKusick-Kaufman/Bardet-Biedl syndromes putative chaperonin isoform 1	Mkks	McKusick-Kaufman/Bardet-Biedl syndromes putative		2.55831	2.56621	2.86737		2.66396
chr1	NP_659124	NM_144875	Rab29	ras-related protein Rab-7L1	Rab7l1	ras-related protein Rab-7L1		2.57159	2.69799	2.96085	2.39318	2.6559
chr8	Q8K2D6	NM_001161516	Dctd	deoxycytidylate deaminase	Dctd	deoxycytidylate deaminase	2.08368		2.1647	3.92277	2.40919	2.64509
chr8	Q8R1R4	NM_001135100	Il34	interleukin-34 isoform 1 precursor	Il34	interleukin-34 isoform 1	2.16904	2.64266			3.1038	2.6385
chr4	A2AKG8	NM_001081184	Focad	focadhesin	BC057079	hypothetical protein LOC230393		2.44759	2.45014		3.01546	2.63773
chr6	Q9QXS8	NM_023493	Nat8f5	probable N-acetyltransferase CML5	Cml5	probable N-acetyltransferase CML5	2.53867	2.63041	2.16857	3.18658		2.63106
chr15		NR_028447	Hdac10		Hdac10	Mus musculus 0 day neonate thymus cDNA, RIKEN full-length enriched library, clone:A430080A07 product:signal transducer and activator of transcription 6, full insert sequence.		2.14523	2.62816		3.08208	2.61849
chr6	Q8K3I9-3	NM_133236	Glcci1	glucocorticoid-induced transcript 1 protein isoform 1	Glcci1	glucocorticoid-induced transcript 1 protein		2.20779	2.44247	3.57489	2.24635	2.61787
chr8	Q8VCC1	NM_008278	Hpgd	15-hydroxyprostaglandin dehydrogenase [NAD(+)]	Hpgd	15-hydroxyprostaglandin dehydrogenase [NAD+]		2.70854	2.35065	3.18234	2.21553	2.61427
chr11	Q69ZG7	n/a	n/a	n/a	Rnf213	SubName: Full=MKIAA1554 protein; Flags: Fragment;			3.13735	2.16298	2.51837	2.60623
chr4		NR_029450	C530005A16Rik		C530005A16Rik	Mus musculus 12 days embryo embryonic body between diaphragm region and neck cDNA, RIKEN full-length enriched library, clone:9430079K24 product:unclassifiable, full insert sequence.	2.56317	2.68531		2.56694		2.60514
chr17	Q3U5M3	NM_207219	Oard1	O-acetyl-ADP-ribose deacetylase 1	AI314976	hypothetical protein LOC106821			2.90941	2.82935	2.07347	2.60408
chr10	Q5FW94	NM_008921	Prim1	DNA primase small subunit	Prim1	DNA primase small subunit	2.96534	2.22457	2.7864	2.30148	2.72997	2.60155
chr11	NP_001156490	NM_001163018	Suz12	polycomb protein Suz12 isoform 2	Suz12	polycomb protein Suz12 isoform 2	3.34528			2.29321	2.16202	2.60017
chr1	Q9ET80	NM_020604	Jph1	junctophilin-1	Jph1	junctophilin-1		2.18608	2.86691	2.74497		2.59932
chr10	Q549D0	NM_001042580	Cd63	CD63 antigen	Cd63	CD63 antigen		2.78786	2.36623	2.47557	2.7674	2.59926
chr7	NP_081629	NM_027353	Cd2bp2	CD2 antigen cytoplasmic tail-binding protein 2	Cd2bp2	CD2 antigen cytoplasmic tail-binding protein 2	2.0315		2.56718	3.19635		2.59834
chr2		n/a	n/a	n/a	Gm13293	Mus musculus adult male corpora quadrigemina cDNA, RIKEN full-length enriched library, clone:B230321I02 product:unclassifiable, full insert sequence.	2.38597	2.57678	2.53447	2.88943		2.59666
chr14	Q6NSV7-4	NM_001024512	Fam149b	protein FAM149B1 isoform 1	Fam149b	RecName: Full=Protein FAM149B1;	2.14836		2.45379	3.1366		2.57958
chr11	Q8BX80	NM_172573	Engase	cytosolic endo-beta-N-acetylglucosaminidase	Engase	cytosolic endo-beta-N-acetylglucosaminidase			2.47917	2.54388	2.69784	2.57363
chr8		n/a	n/a	n/a	n/a	Mus musculus adult male testis cDNA, RIKEN full-length enriched library, clone:4933415P20 product:unclassifiable, full insert sequence.	2.95133	2.29313		2.84112	2.15455	2.56003
chr12		NR_015602	F730043M19Rik		F730043M19Rik	Mus musculus 7 days neonate cerebellum cDNA, RIKEN full-length enriched library, clone:A730065B08 product:hypothetical protein, full insert sequence.		2.25352	2.09082	3.33108		2.55847
chr8	D3YU63	NM_177304	Enpp6	ectonucleotide pyrophosphatase/phosphodiesterase family member 6 preproprotein	Enpp6	ectonucleotide pyrophosphatase/phosphodiesterase	2.01981		3.14562	2.49085		2.55209
chr19	Q543J7	NM_023792	Pank1	pantothenate kinase 1 isoform 2	Pank1	pantothenate kinase 1 isoform 2		2.37414	2.6756	2.59341		2.54772
chr5	Q14AW5-3	NM_027602	Nsun7	putative methyltransferase NSUN7 isoform 3	Nsun7	putative methyltransferase NSUN7			2.26741	3.10758	2.25258	2.54252
chr9	Q6PIJ4	NM_172766	Nfrkb	nuclear factor related to kappa-B-binding protein	Nfrkb	RecName: Full=Nuclear factor related to kappa-B-binding protein; AltName: Full=DNA-binding protein R kappa-B;	2.68427		2.05353	2.88715		2.54165
chr18	Q9CQE0	NM_207623	Rnf138	E3 ubiquitin-protein ligase RNF138 isoform 1	Rnf138	E3 ubiquitin-protein ligase RNF138 isoform 1		2.69444		2.39704	2.52873	2.54007
chr9	NP_084038	NM_029762	Hyls1	hydrolethalus syndrome protein 1 homolog	Hyls1	hydrolethalus syndrome protein 1 homolog		2.4321		2.9094	2.26937	2.53696
chr11	P08043	NM_001044700	Zfp2	zinc finger protein 2	Zfp2	zinc finger protein 2			2.28677	2.12528	3.18494	2.53233
chr7	NP_033412	NM_009386	Tjp1	tight junction protein ZO-1 isoform 1	Tjp1	tight junction protein ZO-1 isoform 1	3.33874	2.10621	2.38954		2.29073	2.53131
chr8	Q8BP31	NM_175136	Rnf122	RING finger protein 122	Rnf122	RING finger protein 122			3.30844	2.01085	2.26518	2.52816
chr1	Q8BPE4	NM_175106	Tmem177	transmembrane protein 177	Tmem177	transmembrane protein 177		2.24997	2.50938	2.98231	2.35298	2.52366
chr5	Q91VF6-2	NM_024474	Col26a1	collagen alpha-1(XXVI) chain isoform 1 precursor	Emid2	collagen alpha-1(XXVI) chain precursor			2.15144	3.05238	2.36436	2.52273
chr10	Q544C7	NM_015790	Icosl	ICOS ligand precursor	Icosl	ICOS ligand precursor	2.31611			2.96867	2.28317	2.52265
chr16	Q8C4S9	NM_138664	Dnajc28	dnaJ homolog subfamily C member 28 isoform 2	Dnajc28	dnaJ homolog subfamily C member 28 isoform 2	2.49524		2.99593	2.07419		2.52179
chr11	Q8R0I1	NM_008819	Pemt	phosphatidylethanolamine N-methyltransferase isoform b	Pemt	phosphatidylethanolamine N-methyltransferase	2.44136		2.48348	2.61245		2.51243
chr8	B2RTA7	NM_001035123	Setd6	N-lysine methyltransferase SETD6	Setd6	SET domain-containing protein 6		2.61492	2.06553	2.46014	2.88977	2.50759
chr3		NM_010269	Gdap2	ganglioside-induced differentiation-associated protein 2	Gdap2	Mus musculus adult male liver cDNA, RIKEN full-length enriched library, clone:1300003N14 product:ganglioside-induced differentiation-associated-protein 2, full insert sequence.	2.99227	2.54427	2.32661		2.16626	2.50735
chr5	NP_035708	NM_011578	Tgfbr3	transforming growth factor beta receptor type 3 precursor	Tgfbr3	transforming growth factor beta receptor type 3			2.07989	3.34317	2.07996	2.50101
chr2	B7ZCT0	NM_026446	Rgs19	regulator of G-protein signaling 19 isoform b	Rgs19	regulator of G-protein signaling 19		2.03068	2.83561		2.62202	2.4961
chr13	NP_783594	NM_175663	Hist1h2ba	histone H2B type 1-A	Hist1h2ba	histone H2B type 1-A	2.48006		2.53468	2.46649		2.49374
chr1	Q3TAA7	NM_027886	Stk11ip	serine/threonine-protein kinase 11-interacting protein	Stk11ip	serine/threonine-protein kinase 11-interacting	2.11691	2.75648			2.58909	2.48749
chr1	Q3U5A0	NM_001039126	Asb1	ankyrin repeat and SOCS box protein 1 isoform a	Asb1	ankyrin repeat and SOCS box protein 1 isoform a	2.12744		3.05179		2.26176	2.48033
chrX	Q9D4J7-2	NM_027642	Phf6	PHD finger protein 6 isoform 1	Phf6	PHD finger protein 6		2.6332	2.02213	2.77746		2.4776
chr13	NP_783596	NM_175665	Hist1h2bk	histone H2B type 1-K	Hist1h2bk	histone H2B type 1-K	2.56325	2.50376	2.08464	2.71766		2.46733
chr16	NP_766202	NM_172614	Tmem44	transmembrane protein 44	Tmem44	transmembrane protein 44	2.00356	2.74485	2.64299			2.4638
chr13	B2RQI5	NM_010225	Foxf2	forkhead box protein F2	Foxf2	forkhead box protein F2			2.43863	2.78838	2.16162	2.46288
chr1	Q3UWW3	NM_001033636	Prex2	phosphatidylinositol 3,4,5-trisphosphate-dependent Rac exchanger 2 protein isoform 2	Prex2	phosphatidylinositol			2.06868	2.93284	2.38646	2.46266
chr11	Q5NBX1	NM_172496	Cobl	protein cordon-bleu isoform 1	Cobl	protein cordon-bleu	2.28936			2.12832	2.92627	2.44798
chr13	NP_835505	NM_178198	Hist1h2bj	histone H2B type 1-F/J/L	Hist1h2bj	histone H2B type 1-F/J/L	2.59976	2.04855	2.57679	2.56665		2.44794
chr8	Q5DU14	NM_001081397	n/a	n/a	Myo16	myosin-XVI	2.2855	2.03759	3.0096			2.44423
chr2	D3Z764	NM_001109690	Phf21a	PHD finger protein 21A isoform 2	Phf21a	PHD finger protein 21A isoform 3		2.47231	2.62796	2.19008		2.43012
chr7		n/a	n/a	n/a	n/a	Mus musculus adult male corpus striatum cDNA, RIKEN full-length enriched library, clone:C030029H02 product:unclassifiable, full insert sequence.		2.51036	2.50161	2.27785		2.42994
chr14	NP_032503	NM_008477	Ktn1	kinectin isoform 1	Ktn1	kinectin	2.72482		2.30482	2.25576		2.42847
chr6	Q3UDM0	NM_145571	Mob1a	MOB kinase activator 1A	Mobkl1b	SubName: Full=Putative uncharacterized protein;	2.25854	2.36769			2.65037	2.42553
chr5	Q9D281	NM_026667	Fam114a1	protein Noxp20	Fam114a1	protein Noxp20		2.1994		2.86703	2.19875	2.42173
chr7	Q9CR53	NM_026523	Nmb	neuromedin-B isoform 2 preproprotein	Nmb	neuromedin-B precursor	2.09203		2.66926	2.80196	2.0945	2.41444
chrX	A2AIH5	NM_011081	Piga	N-acetylglucosaminyl-phosphatidylinositol biosynthetic protein	Piga	N-acetylglucosaminyl-phosphatidylinositol		2.6003	2.49309		2.13293	2.40877
chr9	Q3ULB0	NM_029169	Rbm6	RNA-binding protein 6 isoform b	Rbm6	RNA binding motif protein 6 isoform b	2.21888	2.34761	2.65418			2.40689
chr3	A6H659	NM_001195031	Pag1	phosphoprotein associated with glycosphingolipid-enriched microdomains 1	Pag1	phosphoprotein associated with	2.34105	2.6006	2.2718			2.40448
chr5	Q8JZS6	NM_201369	N4bp2l2	NEDD4-binding protein 2-like 2	N4bp2l2	NEDD4-binding protein 2-like 2		2.74797	2.13342	2.32214		2.40118
chr8		NM_133792	Pla2g15	group XV phospholipase A2 precursor	Pla2g15	Mus musculus lysosomal phospholipase A2 (Lpla2) mRNA, complete cds.	2.22157	2.12974			2.85031	2.40054
chr3	Q3UUE9	NM_001033349	Ankub1	protein ANKUB1	Gm410	hypothetical protein LOC242037		2.13444	2.41239	2.65179		2.39954
chr16	Q6P5G6	NM_177633	Ubxn7	UBX domain-containing protein 7	Ubxn7	UBX domain-containing protein 7		2.3784	2.07062	2.72699		2.392
chr12		NM_172582	Coq6	ubiquinone biosynthesis monooxygenase COQ6, mitochondrial precursor	Coq6	Mus musculus 13 days embryo forelimb cDNA, RIKEN full-length enriched library, clone:5930427M12 product:hypothetical Aromatic-ring hydroxylase (flavoprotein monooxygenase) containing protein, full insert sequence.	2.11689		2.48431	2.93872	2.0261	2.3915
chr13		n/a	n/a	n/a	n/a	Mus musculus adult male spinal cord cDNA, RIKEN full-length enriched library, clone:A330050A06 product:unclassifiable, full insert sequence.	2.25004	2.53224	2.38865			2.39031
chr12	Q9QZS3-2	NM_010949	Numb	protein numb homolog isoform 2	Numb	protein numb homolog isoform 2	2.49186	2.0328		3.01851	2.01572	2.38972
chr11	B0QZF6	NM_001045516	Proca1	protein PROCA1	Proca1	protein PROCA1			2.53878	2.61653	2.00943	2.38825
chr7	Q6NV66	NM_172749	Zfp646	zinc finger protein 646	Zfp646	zinc finger protein 646	2.30573		2.58539	2.25648		2.38253
chr10	Q0VGJ1	NM_013904	Hey2	hairy/enhancer-of-split related with YRPW motif protein 2	Hey2	hairy/enhancer-of-split related with YRPW motif			2.53011	2.56243	2.04657	2.3797
chr1	Q9ER38	NM_023141	Tor3a	torsin-3A precursor	Tor3a	torsin-3A precursor		2.26612	2.55044	2.27868		2.36508
chr8	Q6PFX9	NM_175091	Tnks	tankyrase-1	Tnks	tankyrase, TRF1-interacting ankyrin-related			2.36285	2.01381	2.69715	2.35794
chr9		n/a	n/a	n/a	n/a	Mus musculus 16 days neonate thymus cDNA, RIKEN full-length enriched library, clone:A130069A15 product:unclassifiable, full insert sequence.			2.01715	2.696	2.35118	2.35478
chr11	Q8R0E0	NM_138949	Zfp286	zinc finger protein 286A	Zfp286	SubName: Full=Zfp286 protein;		2.59916		2.26967	2.19141	2.35341
chr11		NM_010822	Mpg	DNA-3-methyladenine glycosylase	Mpg	Mus musculus adult male hypothalamus cDNA, RIKEN full-length enriched library, clone:A230081P17 product:N-methylpurine-DNA glycosylase, full insert sequence.		2.50777		2.14098	2.41031	2.35302
chr13	Q8K2P6	NM_001131068	Rfesd	Rieske domain-containing protein	Rfesd	Rieske domain-containing protein	2.20065	2.31097	2.54031			2.35064
chr17	Q8CJ53-4	NM_134125	Trip10	cdc42-interacting protein 4 isoform 3	Trip10	cdc42-interacting protein 4		2.00183	2.38387	2.66347		2.34972
chr15	O08911	NM_013871	Mapk12	mitogen-activated protein kinase 12	Mapk12	mitogen-activated protein kinase 12	2.35307			2.23221	2.45517	2.34682
chr1		NM_001011874	Xkr4	XK-related protein 4	Xkr4	Mus musculus 2 days neonate sympathetic ganglion cDNA, RIKEN full-length enriched library, clone:7120441D17 product:unclassifiable, full insert sequence.			2.22097	2.71995	2.09949	2.3468
chr17	Q9CPQ5	NM_031863	Cenpq	centromere protein Q	Cenpq	centromere protein Q		2.77773	2.03231	2.20287		2.33764
chr6	Q9JIY7	NM_023455	Nat8	N-acetyltransferase 8	Nat8	N-acetyltransferase 8	2.29993	2.52526	2.18248			2.33589
chr1		NR_033536	Gm10516		Gm10516	Mus musculus 10 days lactation, adult female mammary gland cDNA, RIKEN full-length enriched library, clone:D730002O16 product:hypothetical protein, full insert sequence.		2.28137	2.34967	2.34558		2.32554
chr5	NP_598682	NM_133921	Nfxl1	NF-X1-type zinc finger protein NFXL1	Nfxl1	nuclear transcription factor, X-box binding-like		2.28214	2.27552		2.3963	2.31799
chr15	NP_032758	NM_008732	Slc11a2	natural resistance-associated macrophage protein 2 isoform 2	Slc11a2	natural resistance-associated macrophage protein		2.35657	2.23016	2.34731		2.31135
chr2	Q3TRG2	NM_001164791	Map3k20	mitogen-activated protein kinase kinase kinase 20 isoform 3	B230120H23Rik	mitogen-activated protein kinase kinase kinase	2.31179		2.3219	2.51138	2.08682	2.30797
chr11	Q5NCI4	NM_018870	Pgam2	phosphoglycerate mutase 2	Pgam2	phosphoglycerate mutase 2		2.6615		2.25637	2.00053	2.30613
chr19	Q3TQ82	NM_001033128	Bbs1	Bardet-Biedl syndrome 1 protein	Bbs1	Bardet-Biedl syndrome 1	2.1632		2.73777	2.01301		2.30466
chr17		NM_139154	Rab40c	ras-related protein Rab-40C	Rab40c	Mus musculus Rab40C mRNA for Rab40C, complete cds.	2.31208		2.45071		2.14447	2.30242
chr2	NP_001153084	NM_001159612	Lrrc57	leucine-rich repeat-containing protein 57 isoform c	Lrrc57	leucine-rich repeat-containing protein 57		2.48554	2.03624	2.38305		2.30161
chr17	NP_083878	NM_029602	Znrd1as	putative uncharacterized protein ZNRD1-AS1	Znrd1as	ZNRD1 antisense RNA			2.20911	2.13154	2.5499	2.29685
chr19	Q9D844	NM_020566	Dnajc4	dnaJ homolog subfamily C member 4	Dnajc4	dnaJ homolog subfamily C member 4	2.5198	2.04674	2.31122			2.29259
chr9	Q60520	NM_011378	Sin3a	paired amphipathic helix protein Sin3a isoform 1	Sin3a	paired amphipathic helix protein Sin3a isoform	2.1417	2.39129	2.33814			2.29038
chr17	NP_035847	NM_011717	Wiz	protein Wiz isoform 2	Wiz	protein Wiz isoform 2		2.46688	2.16525		2.2268	2.28631
chr2	A2AJD2	NM_025876	Cdk5rap1	CDK5 regulatory subunit-associated protein 1	Cdk5rap1	CDK5 regulatory subunit-associated protein 1	2.28355	2.0847		2.47896		2.2824
chr4		NM_028266	Col16a1	collagen alpha-1(XVI) chain precursor	Col16a1	collagen alpha-1(XVI) chain precursor			2.22633	2.47863	2.10824	2.27107
chr2	Q9DBR1-2	NM_011917	Xrn2	5'-3' exoribonuclease 2	Xrn2	5'-3' exoribonuclease 2	2.20488	2.42093	2.15599			2.2606
chr1_random	Q5U445	NM_001008551	n/a	n/a	CAAA01192801.1.8328.1	hypothetical protein LOC434632		2.38529	2.18504		2.20621	2.25885
chrUn_random	Q5U445	NM_001008551	n/a	n/a	AC122792.1	hypothetical protein LOC434632		2.38529	2.18504		2.20621	2.25885
chr7		NR_003555	Vmn2r29		Vmn2r29	Mus musculus adult male olfactory brain cDNA, RIKEN full-length enriched library, clone:6430701C03 product:PUTATIVE PHEROMONE RECEPTOR (FRAGMENT) homolog [Mus musculus], full insert sequence.		2.21897	2.07648	2.43243		2.24263
chr1	D1FNM8	NM_213616	Atp2b4	plasma membrane calcium-transporting ATPase 4 isoform b	Atp2b4	plasma membrane calcium ATPase 4 isoform x/b		2.4674	2.1444	2.11401		2.24194
chrX	P82343	NM_023132	Renbp	N-acylglucosamine 2-epimerase isoform 1	Renbp	N-acylglucosamine 2-epimerase isoform 1		2.09901		2.32958	2.27853	2.23571
chr15	Q8BMG8	NM_172402	Slc25a32	mitochondrial folate transporter/carrier	Slc25a32	mitochondrial folate transporter/carrier		2.37882		2.19972	2.11917	2.23257
chr7	Q9D123	NM_026827	Tmem219	insulin-like growth factor-binding protein 3 receptor precursor	Tmem219	transmembrane protein 219	2.57942	2.01833	2.09891			2.23222
chr17	NP_084409	NM_030133	Srbd1	S1 RNA-binding domain-containing protein 1	Srbd1	S1 RNA-binding domain-containing protein 1	2.1807		2.00397	2.51017		2.23161
chr7	Q920M7	NM_138649	Syt17	synaptotagmin-17	Syt17	synaptotagmin-17		2.10251	2.54934		2.02248	2.22478
chr7	Q8BHL6	NM_178643	Faap24	Fanconi anemia core complex-associated protein 24	C230052I12Rik	Fanconi anemia-associated protein of 24 kDa	2.24002	2.05412		2.36299		2.21904
chr7	Q9CZX2	NM_028120	Cep89	centrosomal protein of 89 kDa	Ccdc123	coiled-coil domain-containing protein 123,		2.17952	2.34115	2.1339		2.21819
chrX		NR_015552	5330434G04Rik		5330434G04Rik	Mus musculus adult male olfactory brain cDNA, RIKEN full-length enriched library, clone:6430500B09 product:unclassifiable, full insert sequence.	2.062	2.25724			2.33064	2.21663
chr7	NP_001092106	NM_001098636	Pwwp2b	PWWP domain-containing protein 2B isoform 1	Pwwp2b	PWWP domain containing 2 isoform 1			2.02233	2.49238	2.08043	2.19838
chr1	Q9ERD6-3	NM_001159967	Ralgps2	ras-specific guanine nucleotide-releasing factor RalGPS2 isoform b	Ralgps2	ras-specific guanine nucleotide-releasing factor	2.55932	2.00336		2.02899		2.19722
chr1	Q91WJ7-2	NM_001164566	Spats2l	SPATS2-like protein isoform 2	Spats2l	SPATS2-like protein isoform 2	2.11918	2.44477			2.01965	2.19453
chr17	Q8R3X0	NM_021337	Skiv2l	helicase SKI2W	Skiv2l	SubName: Full=Skiv2l protein; Flags: Fragment;			2.28701	2.2281	2.06522	2.19344
chr6	B7ZMR9	NM_001081678	Zfp800	zinc finger protein 800	Zfp800	zinc finger protein 800	2.02656	2.43756	2.30421	2.08094	2.11503	2.19286
chr14	Q3V1H4	NM_007920	Elf1	ETS-related transcription factor Elf-1 isoform 1	Elf1	ETS-related transcription factor Elf-1			2.18454	2.0722	2.31865	2.1918
chr13	NP_659084	NM_144835	Heatr1	HEAT repeat-containing protein 1	Heatr1	BAP28 protein		2.19654	2.04436	2.31939		2.18676
chr13	NP_835492	NM_001177544	Hist1h2ao	histone H2A type 1-O	Hist1h2ao	histone H2A type 1		2.20897	2.16706	2.17135		2.18246
chr13	NP_835492	NM_001177544	Hist1h2ao	histone H2A type 1-O	Hist1h2ap	histone H2A type 1		2.20897	2.16706	2.17135		2.18246
chr18	A2RTK9	NM_008058	Fzd8	frizzled-8 precursor	Fzd8	frizzled-8 precursor		2.30597	2.0413	2.16154		2.1696
chr12	Q4KL13	NM_001025605	Gm527	uncharacterized protein C14orf28 homolog	Gm527	hypothetical protein LOC217648	2.12264			2.36768	2.01709	2.16914
chr16	Q922I8	NM_008225	Hcls1	hematopoietic lineage cell-specific protein	Hcls1	hematopoietic lineage cell-specific protein		2.02959	2.06826	2.37845		2.15877
chr4	NP_001186895	NM_001199963	Gm13306	chemokine (C-C motif) ligand 27b isoform 3	Gm2506	chemokine (C-C motif) ligand 27b isoform 3		2.05196	2.23865	2.18118		2.15726
chr4	NP_001186895	NM_001199960	Ccl27b	chemokine (C-C motif) ligand 27b isoform 3	Ccl27b	chemokine (C-C motif) ligand 27b isoform 3		2.05196	2.23865	2.18118		2.15726
chr17		NM_001081160	Mdga1	MAM domain-containing glycosylphosphatidylinositol anchor protein 1 precursor	Mdga1	Mus musculus adult male lung cDNA, RIKEN full-length enriched library, clone:1200011I03 product:hypothetical MAM domain containing protein, full insert sequence.		2.11492	2.2618	2.02461		2.13378
chr13	Q0VEA0	NM_172807	Ppwd1	peptidylprolyl isomerase domain and WD repeat-containing protein 1	Ppwd1	peptidylprolyl isomerase domain and WD			2.17499	2.1133	2.09866	2.12898
chr5	Q80WC9	NM_173765	Aasdh	acyl-CoA synthetase family member 4	Aasdh	acyl-CoA synthetase family member 4	2.26012		2.00135	2.15708	2.09148	2.12751
chr17	B8JJZ9	NM_001024950	Zfp563	zinc finger protein 563	Zfp563	zinc finger protein 563		2.13107	2.09224	2.20946	2.06475	2.12438
chr13		n/a	n/a	n/a	AW495222	Mus musculus adult male corpora quadrigemina cDNA, RIKEN full-length enriched library, clone:B230346L21 product:unclassifiable, full insert sequence.		2.15869		2.06191	2.12133	2.11398
chr10	Q91VB0	NM_010361	Gstt2	glutathione S-transferase theta-2	Gstt2	glutathione S-transferase theta-2	2.06527			2.10757	2.11993	2.09759
chr4	Q3UTA6	NM_130881	Pabpc4	polyadenylate-binding protein 4 isoform 1	Pabpc4	SubName: Full=Putative uncharacterized protein; Flags: Fragment;		2.07611	2.10542	2.11091		2.09748
chr4	NP_001186895	NM_001199960	Ccl27b	chemokine (C-C motif) ligand 27b isoform 3	Gm13306	chemokine (C-C motif) ligand 27b isoform 3		2.05196	2.06028	2.0019		2.03805

## Sheet: H1N1 only
Gene.chrom	Gene.proteinID	RefSeq.value	refLink.name	refLink.product	GeneName.value	Description	Data has been reduced to values >2 FPKM and group mean on 3 or more samples
H1N1 only							H1N1					MEAN
chr12		NR_037233	Mir3072		AC121784.5	Mus musculus 16 days embryo head cDNA, RIKEN full-length enriched library, clone:C130007E11 product:unclassifiable, full insert sequence.	44.1731		153.819	56.4365	86.5915	85.255
chr2		NR_037217	Mir2861		AL772271.4	Mus musculus microRNA 2861 (Mir2861), microRNA.	46.3769		161.615		45.4559	84.4826
chr9	P52480-2	NM_011099	Pkm	pyruvate kinase PKM isoform M2	Pkm2	pyruvate kinase isozymes M1/M2	86.1219	83.9903	74.5367		79.8154	81.1161
chr14	NP_997517	NM_207634	Rps24	40S ribosomal protein S24 isoform 2	Rps24	40S ribosomal protein S24 isoform 2		18.2338	36.4655	26.8232	112.322	48.4611
chr2		NR_029838	Mir219a-2		Mir219-2	Mus musculus cDNA clone IMAGE:40109799.			41.4788	61.3595	23.5362	42.1248
chr1		NR_028555	Snord89		Snord89	Mus musculus small nucleolar RNA, C/D box 89 (Snord89), small nucleolar RNA.		36.9452	23.4328	34.6168		31.6649
chr3	Q8C649	NM_008913	Ppp3ca	serine/threonine-protein phosphatase 2B catalytic subunit alpha isoform isoform 1	Ppp3ca	serine/threonine-protein phosphatase 2B	21.1695			19.3805	19.9448	20.1649
chr11	Q3V209	NM_028076	Tmub2	transmembrane and ubiquitin-like domain-containing protein 2 isoform 1	Tmub2	transmembrane and ubiquitin-like	14.9528			27.1066	15.9189	19.3261
chr12		NR_030450	Mir681		Mir681	Mus musculus microRNA 681 (Mir681), microRNA.	14.9247		12.8315	19.0681		15.6081
chr2		NR_002898	Snora65		Snora65	Mus musculus small nucleolar RNA, H/ACA box 65 (Snora65), small nucleolar RNA.	11.4936		9.86175		22.5307	14.6287
chrX	Q5U4C1	NM_001004359	Gprasp1	G-protein coupled receptor-associated sorting protein 1	Gprasp1	G-protein coupled receptor-associated sorting	12.6531	15.6793			11.8965	13.4096
chr16	Q9CQX5	NM_171826	Cldnd1	claudin domain-containing protein 1 isoform 1	Cldn25	claudin domain-containing protein 1	15.9813	6.21097		13.5718		11.9214
chrX		NR_001463	Xist		Xist	Mus musculus adult male kidney cDNA, RIKEN full-length enriched library, clone:0610031I13 product:Mus musculus inactive X specific transcripts (Xist) on chromosome X, transcript variant 2, full insert sequence.	2.34873			20.8209	11.2499	11.4732
chr10	Q3TF41	NM_015781	Nap1l1	nucleosome assembly protein 1-like 1 isoform 2	Nap1l1	nucleosome assembly protein 1-like 1 isoform 2		11.3136	10.6634		8.80491	10.2606
chr4	Q6PFE7-2	NM_021436	Tmeff1	tomoregulin-1 precursor	Tmeff1	tomoregulin-1 precursor	7.38604	16.9263	7.49285	8.67627		10.1204
chr18	C1IE02	NM_144865	Reep2	receptor expression-enhancing protein 2 isoform 1	Reep2	receptor expression-enhancing protein 2		9.12036	9.92		8.86127	9.30054
chr15	Q8BPL7	NM_033218	Srebf2	sterol regulatory element-binding protein 2	Srebf2	SubName: Full=Putative uncharacterized protein; SubName: Full=Srebf2 protein;	9.78346	8.89588			8.67558	9.11831
chr6	Q8C7D2-3	NM_021449	Crbn	protein cereblon isoform 1	Crbn	protein cereblon isoform 1	18.05		7.9436	5.36879	4.44434	8.95168
chr1		NR_002840	Gas5		Gas5	Mus musculus 9 days embryo whole body cDNA, RIKEN full-length enriched library, clone:D030018K05 product:growth arrest specific 5, full insert sequence.	9.59623	8.19339	8.06153	8.74768		8.64971
chr9	Q9D7I0-5	NM_025858	Shisa5	protein shisa-5 isoform 1 precursor	Shisa5	protein shisa-5 isoform 2	8.069		2.65878		14.7013	8.47636
chr6	Q9DB86	NM_018810	Mkrn1	E3 ubiquitin-protein ligase makorin-1 isoform 1	Mkrn1	E3 ubiquitin-protein ligase makorin-1		10.4973	6.94774	7.83538	7.31921	8.14991
chr7		NM_025460	Tmem126a	transmembrane protein 126A	Tmem126a	Mus musculus adult male cerebellum cDNA, RIKEN full-length enriched library, clone:1500032K02 product:hypothetical protein, full insert sequence.	4.23962	10.8796		8.67821		7.93248
chr1	D3YY54	NR_033728	n/a	n/a	Nit1	nitrilase homolog 1 isoform 1	6.75009	8.07703			8.70527	7.84413
chr5	B2RU82	NM_178651	Slc30a9	zinc transporter 9 isoform 1	Slc30a9	zinc transporter 9		11.3498		7.13148	4.97556	7.81895
chr15	Q6NZB5	NM_011241	Rangap1	ran GTPase-activating protein 1	Rangap1	ran GTPase-activating protein 1	6.85749	8.21318		6.39695	8.64909	7.52918
chr1	D3YVX4	NM_028534	Smap1	stromal membrane-associated protein 1 isoform 1	Smap1	stromal membrane-associated protein 1	7.42278			7.09747	7.61282	7.37769
chr4	B9EK89	NM_001081557	Camta1	calmodulin-binding transcription activator 1 isoform 1	Camta1	SubName: Full=Camta1 protein;	9.45547	5.02611		8.1037	6.43214	7.25436
chr13	Q9D154	NM_025429	Serpinb1a	leukocyte elastase inhibitor A	Serpinb1a	leukocyte elastase inhibitor A	8.43645		6.76092		6.18199	7.12645
chr1	Q3UXB6	NR_027853	Clk1		Clk1	SubName: Full=CDC-like kinase 1, isoform CRA_a; SubName: Full=Putative uncharacterized protein;		6.88028	5.29799	8.72547		6.96791
chr15	Q3UW66	NM_001162492	Mpst	3-mercaptopyruvate sulfurtransferase	Mpst	3-mercaptopyruvate sulfurtransferase	5.95607	2.6581		11.6311		6.74842
chr17	NP_031592	NM_007566	Birc6	baculoviral IAP repeat-containing protein 6	Birc6	baculoviral IAP repeat-containing 6	6.99326	4.62959	8.20865	6.87526		6.67669
chr6	Q9DCS1	NM_001098271	Tmem176a	transmembrane protein 176A	Tmem176a	transmembrane protein 176A	8.75869		3.7064	5.73911	8.31427	6.62962
chr5		NM_172706	9330182L06Rik	UPF0577 protein KIAA1324-like homolog precursor	9330182L06Rik	Mus musculus adult male diencephalon cDNA, RIKEN full-length enriched library, clone:9330182L06 product:CDNA FLJ31340 FIS, CLONE MESAN1000035, WEAKLY SIMILAR TO MAJOR SURFACE-LABELED TROPHOZOITE ANTIGEN PRECURSOR homolog [Homo sapiens], full insert sequence.	5.93238		6.04365	7.15659		6.37754
chr3	Q52KE7	NM_019937	Ccnl1	cyclin-L1	Ccnl1	RecName: Full=Cyclin-L1; Short=Cyclin-L; AltName: Full=Cyclin Ania-6a;	6.24329	11.1094	4.92924		3.16448	6.3616
chr1	A0JLN0	NM_031179	Sf3b1	splicing factor 3B subunit 1	Sf3b1	SubName: Full=Sf3b1 protein; Flags: Fragment;	6.43348	5.87365	6.08958	6.806		6.30068
chr4	NP_666254	NM_146142	Tdrd7	tudor domain-containing protein 7 isoform 2	Tdrd7	tudor domain-containing protein 7		10.2962	5.72101	6.23498	2.72131	6.24337
chr10	Q8R310-2	NM_001168684	Tmcc3	transmembrane and coiled-coil domains protein 3 isoform b	Tmcc3	transmembrane and coiled-coil domains protein 3	9.54858	5.01832	3.68595	6.50005		6.18823
chr17	Q3TCU5	NM_001025313	Tapbp	tapasin isoform 1 precursor	Tapbp	tapasin isoform 1	3.61183	11.5106		5.83039	2.92221	5.96876
chr4	B1AXC9	NM_001190324	Chchd7	coiled-coil-helix-coiled-coil-helix domain-containing protein 7	Chchd7	coiled-coil-helix-coiled-coil-helix		5.84061		6.61959	4.94231	5.80084
chr8	Q544D7	NM_011977	Slc27a1	long-chain fatty acid transport protein 1	Slc27a1	long-chain fatty acid transport protein 1		7.74874	4.54908		4.62502	5.64095
chr13	B8JJB5	NM_026131	Pdlim7	PDZ and LIM domain protein 7 isoform c	Pdlim7	PDZ and LIM domain protein 7 isoform c	3.96747		5.09866	7.29566		5.45393
chr3	Q8R4G0-5	NM_133488	Ntng1	netrin-G1 isoform e precursor	Ntng1	netrin-G1 isoform e		4.35596	7.17048		4.64305	5.38983
chr11	Q3U6T3	NM_133757	Pgs1	CDP-diacylglycerol--glycerol-3-phosphate 3-phosphatidyltransferase, mitochondrial	Pgs1	SubName: Full=Putative uncharacterized protein; Flags: Fragment;		5.1837	3.67771	6.04294	6.59884	5.3758
chr19	Q9D8N1	NM_028077	1810055G02Rik	uncharacterized protein C11orf24 homolog precursor	1810055G02Rik	hypothetical protein LOC72056 precursor	6.91692		2.86246	5.72062	5.69543	5.29886
chr2	A2AMD4	NM_001042671	n/a	n/a	Gpcpd1	SubName: Full=Preimplantation protein 4; SubName: Full=Preimplantation protein 4, isoform CRA_a;	7.23087	3.12975		3.88746	6.79264	5.26018
chr15	Q9EPU4	NM_053193	Cpsf1	cleavage and polyadenylation specificity factor subunit 1 isoform 2	Cpsf1	RecName: Full=Cleavage and polyadenylation specificity factor subunit 1; AltName: Full=Cleavage and polyadenylation specificity factor 160 kDa subunit; Short=CPSF 160 kDa subunit;	2.77809	7.93667	2.75852	4.86552	7.92403	5.25257
chr3		NM_019571	Tspan5	tetraspanin-5	Tspan5	Mus musculus tetraspanin Tspan-5 (Tspan5) mRNA, complete cds.	5.59654	5.60576			4.43229	5.21153
chr9	Q6NV83-2	NM_001114977	U2surp	U2 snRNP-associated SURP motif-containing protein isoform 1	2610101N10Rik	U2-associated protein SR140 1	6.60387		5.32772	4.90099	3.80978	5.16059
chr2	A2AMD4	NM_028802	Gpcpd1	glycerophosphocholine phosphodiesterase GPCPD1 isoform 2	Gpcpd1	SubName: Full=Preimplantation protein 4; SubName: Full=Preimplantation protein 4, isoform CRA_a;	4.2748			5.0761	5.53698	4.96263
chr10		NM_009413	Tpd52l1	tumor protein D53	Tpd52l1	Mus musculus tumor protein D53 (mD53) mRNA, complete cds.	2.38372	7.57302			4.82362	4.92679
chr1	Q9CQ79	NM_172054	Txndc9	thioredoxin domain-containing protein 9	Txndc9	thioredoxin domain-containing protein 9			5.29012	5.32796	4.01387	4.87732
chrX	Q8VD04	NM_207670	Gripap1	GRIP1-associated protein 1 isoform 2	Gripap1	GRIP1-associated protein 1	4.11204		4.34351	6.15802		4.87119
chr7	Q9DCH6	NM_022985	Zfand6	AN1-type zinc finger protein 6	Zfand6	AN1-type zinc finger protein 6	2.61267	6.40058		6.03569	4.31888	4.84195
chr19	D3Z5J3	NM_178362	Sorbs1	sorbin and SH3 domain-containing protein 1 isoform 2	Sorbs1	sorbin and SH3 domain-containing protein 1	4.26042		6.56028		3.56022	4.79364
chr8	Q3TRM4-3	NM_001122818	Pnpla6	neuropathy target esterase isoform 1	Pnpla6	neuropathy target esterase		7.522	7.11104	2.0414	2.19847	4.71823
chr4	Q80VW5-8	NM_001008796	n/a	n/a	Whrn	whirlin isoform 7	3.07674	4.51137	3.13327	4.74346	7.6118	4.61533
chr3	Q78KN5	NM_024194	Lrrc40	leucine-rich repeat-containing protein 40 isoform a	Lrrc40	SubName: Full=Lrrc40 protein; SubName: Full=Putative uncharacterized protein;		3.76447	3.66715	6.28868	4.73018	4.61262
chr6	Q07646-2	NM_008590	Mest	mesoderm-specific transcript protein isoform 2	Mest	mesoderm-specific transcript protein	5.28866		4.39565	4.15063		4.61165
chr10	Q6PAV2-2	NM_026101	Herc4	probable E3 ubiquitin-protein ligase HERC4 isoform 2	Herc4	probable E3 ubiquitin-protein ligase HERC4	4.60623			4.71144	4.24531	4.52099
chr6	Q8R023	NM_197992	Pcgf1	polycomb group RING finger protein 1	Pcgf1	polycomb group RING finger protein 1	2.17648	5.5605		5.71103	4.535	4.49575
chr10	Q8C5L3	NM_001037846	Cnot2	CCR4-NOT transcription complex subunit 2 isoform a	Cnot2	CCR4-NOT transcription complex subunit 2 isoform	3.62358	4.9443	4.74244			4.43677
chr14	Q99LJ7	NM_134083	Rcbtb2	RCC1 and BTB domain-containing protein 2	Rcbtb2	RCC1 and BTB domain-containing protein 2	4.90351			4.41376	3.85478	4.39068
chr13	Q8C4U8	NM_010103	Edil3	EGF-like repeat and discoidin I-like domain-containing protein 3 isoform b precursor	Edil3	EGF-like repeat and discoidin I-like	3.04718			5.25797	4.84168	4.38228
chr13	Q8BFY9	NM_178716	Tnpo1	transportin-1 isoform 1	Tnpo1	transportin-1 isoform 1	5.35113		5.5513	2.19633		4.36625
chr17	Q9DCK4-2	NR_034153	Zfp414		Zfp414	zinc finger protein 414		4.5039	3.86248	4.56373		4.31004
chr5		n/a	n/a	n/a	Gm15800	Mus musculus adult female vagina cDNA, RIKEN full-length enriched library, clone:9930113D08 product:hypothetical HECT domain (Ubiquitin-protein ligase) containing protein, full insert sequence.	5.02424			3.23006	4.48985	4.24805
chr19	NP_001095941	NM_001102471	Cnnm2	metal transporter CNNM2 isoform b	Cnnm2	metal transporter CNNM2 isoform b	4.75575		2.32493	5.36944		4.15004
chr7	NP_663564	NM_145589	Prr14	proline-rich protein 14	Prr14	proline-rich protein 14	4.91235			3.46811	3.95664	4.11237
chr3	A8IJD3	NM_001113419	Gm21949	IQ motif containing J-schwannomin interacting protein 1 fusion protein	Schip1	IQ motif containing J-schwannomin interacting		3.5653	3.72122	5.03313		4.10655
chr9	NP_001106651	NM_001113180	Gria4	glutamate receptor 4 isoform 2 precursor	Gria4	glutamate receptor 4 isoform 2 precursor	2.71818	5.45639	4.98308		3.16757	4.08131
chr11	Q8BHJ9	NM_148673	Slu7	pre-mRNA-splicing factor SLU7	Slu7	pre-mRNA-splicing factor SLU7	5.48904		4.85292	2.60605	3.34382	4.07296
chr5	A2RTL5	NM_025438	Rsrc2	arginine/serine-rich coiled-coil protein 2 isoform 2	Rsrc2	arginine/serine-rich coiled-coil protein 2	4.96606	3.47001			3.44962	3.9619
chr9	Q14DQ1	NM_001166364	Fam219b	protein FAM219B isoform 1	2310046O06Rik	hypothetical protein LOC78323 isoform 1	3.01915	3.51579		5.31795		3.95096
chr1	NP_001001565	NM_001001565	Chpf	chondroitin sulfate synthase 2 isoform b	Chpf	chondroitin sulfate synthase 2 isoform b	3.79797		4.11693	4.0645	3.79923	3.94466
chr6	Q9DAS9	NM_001177556	Gng12	guanine nucleotide-binding protein G(I)/G(S)/G(O) subunit gamma-12	Gng12	guanine nucleotide-binding protein	4.32376		5.11972		2.16582	3.86977
chr10	Q9QXQ1	NM_013875	Pde7b	cAMP-specific 3',5'-cyclic phosphodiesterase 7B isoform 2	Pde7b	RecName: Full=cAMP-specific 3',5'-cyclic phosphodiesterase 7B; EC=3.1.4.17;		2.86859	4.54655	4.08382		3.83299
chr4	Q3TZX8	NM_001159599	Nol9	polynucleotide 5'-hydroxyl-kinase NOL9 isoform 1	Nol9	polynucleotide 5'-hydroxyl-kinase NOL9 isoform	4.05542	4.62133			2.69651	3.79109
chr3	A8IJC6	NR_036665	n/a	n/a	Schip1	schwannomin-interacting protein 1 d	5.03911	2.72533		3.72539	3.53801	3.75696
chr7		NM_145583	Pgap2	post-GPI attachment to proteins factor 2	Pgap2	Mus musculus 13 days embryo forelimb cDNA, RIKEN full-length enriched library, clone:5930437G21 product:FGF receptor activating protein 1, full insert sequence.	4.35945		3.57057	3.29137		3.74046
chr11		NM_001015046	Rap1gap2	rap1 GTPase-activating protein 2	Rap1gap2	Mus musculus adult male hypothalamus cDNA, RIKEN full-length enriched library, clone:A230066N08 product:GTPase activating RANGAP domain-like 4, full insert sequence.	2.44479			4.85086	3.89975	3.7318
chr2	A2ATZ6	NM_146123	Cacnb4	voltage-dependent L-type calcium channel subunit beta-4 isoform b	Cacnb4	voltage-dependent L-type calcium channel subunit	3.72646	2.97551	5.00658	3.67219	3.26426	3.729
chr7	Q99N50-6	NM_001040087	Sytl2	synaptotagmin-like protein 2 isoform 4	Sytl2	synaptotagmin-like protein 2 isoform 4	2.5253	4.72366		3.86892		3.70596
chr16	A6H6M8	NM_026202	Ccdc50	coiled-coil domain-containing protein 50 isoform 1	Ccdc50	coiled-coil domain-containing protein 50 isoform		5.28424	3.21174	3.71955	2.60393	3.70486
chr19	Q3TI07	NM_001110504	Capn1	calpain-1 catalytic subunit	Capn1	calpain-1 catalytic subunit	2.42033	6.1534	2.47273	2.55623	4.76994	3.67453
chr6		NR_027009	Gt(ROSA)26Sor		Gt(ROSA)26Sor	Mus musculus 4 days neonate thymus cDNA, RIKEN full-length enriched library, clone:B630013J18 product:gene trap ROSA 26, Philippe Soriano, full insert sequence.	3.80257	5.16705	3.43327		2.26071	3.6659
chr8	P0C7T6	NM_001080930	Atxn1l	ataxin-1-like	Atxn1l	ataxin-1-like	4.52925		2.50045	4.74673	2.68878	3.6163
chr11	E0CXE7	NM_001143790	Ctc1	CST complex subunit CTC1 isoform c	1500010J02Rik	CST complex subunit CTC1 isoform c	3.36787			3.35693	3.98257	3.56912
chr5	Q3UDK1-2	NM_172275	Trafd1	TRAF-type zinc finger domain-containing protein 1 isoform 2	Trafd1	TRAF-type zinc finger domain-containing protein	3.86309	4.54586	2.76674		3.08587	3.56539
chr9	Q3TAW7	NM_009752	Glb1	beta-galactosidase preproprotein	Glb1	RecName: Full=Beta-galactosidase; EC=3.2.1.23;		2.70069	2.89394	4.89679	3.75536	3.5617
chr9	Q6P3D0	NM_029385	Nudt16	U8 snoRNA-decapping enzyme	Nudt16	RecName: Full=U8 snoRNA-decapping enzyme; EC=3.6.1.-; AltName: Full=Nucleoside diphosphate-linked moiety X motif 16; Short=Nudix motif 16;	5.2995	2.80057			2.58406	3.56138
chr19	Q6IR37	NM_027476	Zdhhc24	probable palmitoyltransferase ZDHHC24 isoform a	Zdhhc24	probable palmitoyltransferase ZDHHC24 isoform a		6.05482	2.37831	2.19851		3.54388
chr10	Q3V0H2	NM_054078	Baz2a	bromodomain adjacent to zinc finger domain protein 2A	Baz2a	bromodomain adjacent to zinc finger domain	3.50021		3.15341		3.97582	3.54315
chr8	Q3TRM4-2	NM_001122818	Pnpla6	neuropathy target esterase isoform 1	Pnpla6	neuropathy target esterase	2.52275	3.5518	2.19318	4.15403	5.22753	3.52986
chr6	Q8C8U0-3	NM_001170433	Ppfibp1	liprin-beta-1 isoform 1	Ppfibp1	liprin-beta-1 isoform 1	2.02177	3.55999			4.97539	3.51905
chr5	D3Z4V0	NM_198702	Adgrl3	adhesion G protein-coupled receptor L3 isoform 1 precursor	Lphn3	SubName: Full=Putative uncharacterized protein Lphn3;	4.44895		4.34994	2.66856	2.52215	3.4974
chr9	Q9Z1X4-3	NM_010561	Ilf3	interleukin enhancer-binding factor 3 isoform 1	Ilf3	interleukin enhancer-binding factor 3 isoform 1	3.08735		4.81946		2.57286	3.49322
chr15		NR_028315	Yaf2		Yaf2	Mus musculus YAF2 mRNA for YY1 associated factor-2-a, complete cds.			2.98719	4.35083	3.13799	3.492
chr11	Q62470	NM_013565	Itga3	integrin alpha-3 isoform 1 preproprotein	Itga3	integrin alpha-3		3.02414	4.43087	3.66152	2.7739	3.47261
chr18	B7ZN02	NM_001081963	Jcad	junctional protein associated with coronary artery disease	9430020K01Rik	hypothetical protein LOC240185	2.88025	5.0173	3.12471		2.80218	3.45611
chr13	Q3UD82	NM_001081009	Parp8	poly [ADP-ribose] polymerase 8	Parp8	poly [ADP-ribose] polymerase 8	2.4456		3.80016	3.05768	4.5182	3.45541
chr14	Q8BVH9-3	NM_025907	Mettl6	methyltransferase-like protein 6	Mettl6	RecName: Full=Methyltransferase-like protein 6; EC=2.1.1.-;		4.41904	3.47075		2.47407	3.45462
chr6	Q3U320	NM_008090	Gata2	endothelial transcription factor GATA-2	Gata2	endothelial transcription factor GATA-2		3.83288		2.36916	4.15742	3.45315
chr6	Q7TN74	NM_181595	Ppp1r9a	neurabin-1	Ppp1r9a	neurabin-1		3.16561	3.92771		3.25674	3.45002
chr4	A2AMU9	NM_023536	Mrto4	mRNA turnover protein 4 homolog isoform 2	Mrto4	SubName: Full=MRT4, mRNA turnover 4, homolog (S. cerevisiae); SubName: Full=Mrto4 protein;	2.86434	4.01725		3.46059		3.44739
chr2	B1AY83	NM_001159640	Tasp1	threonine aspartase 1 isoform a	Tasp1	threonine aspartase 1 isoform a		3.88823		3.69571	2.7032	3.42905
chr6	O09012	NM_008995	Pex5	peroxisomal biogenesis factor 5 isoform 1	Pex5	peroxisomal biogenesis factor 5 isoform 1	2.22825	3.33222			4.63701	3.39916
chr17	NP_663458	NM_145483	Zfp160	zinc finger protein 160	Zfp160	zinc finger protein 160		3.26638		3.36552	3.50096	3.37762
chr7	Q60929-3	NM_001033713	Mef2a	myocyte-specific enhancer factor 2A isoform a	Mef2a	RecName: Full=Myocyte-specific enhancer factor 2A;	3.60311	3.65601		2.86713		3.37542
chr1	Q9ERE3	NM_001037759	Sgk3	serine/threonine-protein kinase Sgk3	Sgk3	serine/threonine-protein kinase Sgk3			2.25605	3.59529	4.25329	3.36821
chr9	Q3UHL1	NM_145621	Camkv	caM kinase-like vesicle-associated protein	Camkv	RecName: Full=CaM kinase-like vesicle-associated protein;	2.64011			3.53246	3.93098	3.36785
chr2	Q3U0R5	NM_008091	Gata3	trans-acting T-cell-specific transcription factor GATA-3	Gata3	trans-acting T-cell-specific transcription	4.08083			3.75493	2.26201	3.36592
chr15	Q3TJY1	NM_001164156	Mcrs1	microspherule protein 1 isoform 2	Mcrs1	microspherule protein 1 isoform 2		3.74479		3.88463	2.40779	3.34574
chr11	Q9WTI7-3	NM_001080775	Myo1c	unconventional myosin-Ic isoform a	Myo1c	myosin-Ic isoform a		3.64889	2.98562		3.34137	3.32529
chr16	A6X951	NM_018784	St3gal6	type 2 lactosamine alpha-2,3-sialyltransferase	St3gal6	type 2 lactosamine alpha-2,3-sialyltransferase	4.40696	2.27051		3.24312		3.30686
chr11	Q3UCQ1-2	NM_001080932	Foxk2	forkhead box protein K2	Foxk2	forkhead box protein K2	3.02371	3.27124	5.14788	2.89458	2.06377	3.28024
chr3	Q60665	NM_011386	Skil	ski-like protein isoform a	Skil	ski-like protein isoform a	4.11773	2.08851	4.46804	3.29304	2.40929	3.27532
chr11	Q6P539	NM_145430	Fam222b	protein FAM222B isoform 1	BC017647	hypothetical protein LOC216971		2.0934	4.21703	3.51028		3.27357
chr5	Q9ET43	NM_001193659	Cldn12	claudin-12	Cldn12	claudin-12		4.06623	3.56342	2.98884	2.39618	3.25367
chr18	NP_001157642	NM_001164170	Pias2	E3 SUMO-protein ligase PIAS2 isoform 5	Pias2	E3 SUMO-protein ligase PIAS2 isoform 5	3.27369	3.45073	3.00432			3.24291
chr7	Q99KN6	NM_001146053	Htatip2	oxidoreductase HTATIP2 isoform b	Htatip2	oxidoreductase HTATIP2 isoform b	3.22093		2.98251	3.47685		3.22676
chr2	NP_079922	NM_025646	Crls1	cardiolipin synthase (CMP-forming) isoform 2	Crls1	cardiolipin synthase isoform 2		3.04756		4.52595	2.0993	3.22427
chr7	Q8R0P4-2	NM_001177947	Aamdc	mth938 domain-containing protein isoform 4	1810020D17Rik	hypothetical protein LOC66273 isoform 4		3.98924	3.59497	2.78775	2.49343	3.21635
chr7	Q0PD24	NM_029494	Rab30	ras-related protein Rab-30	Rab30	ras-related protein Rab-30	2.45968		3.77302	4.21956	2.36786	3.20503
chr11	Q08481-2	NM_001032378	Pecam1	platelet endothelial cell adhesion molecule isoform 2 precursor	Pecam1	platelet endothelial cell adhesion molecule	4.08411	3.12371	2.36868	2.29302	4.15313	3.20453
chr12	Q8BMP2	NM_172803	Dock4	dedicator of cytokinesis protein 4	Dock4	dedicator of cytokinesis protein 4	2.23404			3.85458	3.50256	3.19706
chr11	Q5SWV1	NM_019687	Slc22a4	solute carrier family 22 member 4 isoform 1	Slc22a4	SubName: Full=MCG13777, isoform CRA_d; SubName: Full=Solute carrier family 22 (Organic cation transporter), member 4;		2.88776		2.47702	4.21476	3.19318
chr8	Q8BNM3	NM_178708	Pcid2	PCI domain-containing protein 2	Pcid2	SubName: Full=Putative uncharacterized protein;			3.16812	2.03308	4.36691	3.18937
chr14	NP_001177918	NM_001190989	Ndfip2	NEDD4 family-interacting protein 2	Ndfip2	NEDD4 family-interacting protein 2		3.57104		3.11515	2.81003	3.16541
chr4	Q02780-3	NM_001122952	Nfia	nuclear factor 1 A-type isoform 1	Nfia	nuclear factor 1 A-type isoform 2	3.71138			2.90624	2.82748	3.14837
chr11		NR_002322	Tug1		Tug1	Mus musculus 16 days embryo lung cDNA, RIKEN full-length enriched library, clone:8430418P16 product:unclassifiable, full insert sequence.	3.91906		2.58748	2.84823		3.11826
chr11	Q5SVR6	NM_008521	Ltc4s	leukotriene C4 synthase isoform 1	Ltc4s	SubName: Full=Leukotriene C4 synthase; Flags: Fragment;		3.02908	3.27555	2.98108		3.09524
chr16	B9EKJ4	NM_001033237	Yeats2	YEATS domain-containing protein 2 isoform 2	Yeats2	YEATS domain-containing protein 2 isoform 2		3.22453		2.42833	3.62097	3.09128
chrX	B9EI38	NM_178256	Reps2	ralBP1-associated Eps domain-containing protein 2 isoform 1	Reps2	ralBP1-associated Eps domain-containing protein	2.42855		2.35773	4.45732		3.0812
chrX	Q3TZ53	NM_010078	Drp2	dystrophin-related protein 2	Drp2	dystrophin-related protein 2		3.60021	3.42419	3.08819	2.1813	3.07347
chrX	Q810E8	NR_033394	n/a	n/a	Taz	SubName: Full=Putative uncharacterized protein; SubName: Full=Tafazzin exon 5 and exon 9 deleted variant long form;	2.88402			3.70872	2.61156	3.0681
chr18		NM_028707	Psd2	PH and SEC7 domain-containing protein 2	Psd2	Mus musculus adult male medulla oblongata cDNA, RIKEN full-length enriched library, clone:6330404E20 product:weakly similar to BA18I14.3 (PLECKSTRIN AND SEC7 DOMAIN PROTEIN) [Homo sapiens], full insert sequence.	2.38304	3.30067		2.62522	3.90345	3.05309
chr10	Q9D9V3-2	NM_001110195	Echdc1	ethylmalonyl-CoA decarboxylase isoform b	Echdc1	enoyl-CoA hydratase domain-containing protein 1	3.06217		3.1933	2.84247		3.03265
chr1	Q9CZP5	NM_025784	Bcs1l	mitochondrial chaperone BCS1	Bcs1l	mitochondrial chaperone BCS1	2.84889	2.7024	3.54334			3.03154
chr19	Q91XE4	NM_027857	n/a	n/a	Acy3	aspartoacylase-2	4.98393	2.02719	2.00044			3.00385
chr14	NP_001152890	NM_001159418	Irf9	interferon regulatory factor 9 isoform 2	Irf9	interferon regulatory factor 9 isoform 2			2.24337	3.44633	3.29664	2.99545
chrX	A2AG83	NM_001164177	Psmd10	26S proteasome non-ATPase regulatory subunit 10 isoform 2	Psmd10	26S proteasome non-ATPase regulatory subunit 10	2.44088		3.41597	3.10782		2.98822
chr10		NM_182807	Fam19a2	protein FAM19A2 isoform 1	Fam19a2	Mus musculus adult male medulla oblongata cDNA, RIKEN full-length enriched library, clone:6330575M02 product:inferred: unnamed protein product {Macaca fascicularis}, full insert sequence.	2.98143	3.77727	2.20564			2.98811
chr4	Q9D702	NM_027161	Tmem52	transmembrane protein 52 isoform 1 precursor	Tmem52	transmembrane protein 52	3.06402			3.57912	2.31673	2.98662
chr2	A2AIS4	NM_172545	Ehmt1	histone-lysine N-methyltransferase EHMT1 isoform 2	Ehmt1	euchromatic histone methyltransferase 1 isoform		3.97057	2.77063	2.19872		2.97997
chr2	A3KGJ7	NM_001130000	Cep250	centrosome-associated protein CEP250 isoform 3	Cep250	centrosome-associated protein CEP250 isoform 3	3.40668	2.83064	2.26223		3.36107	2.96516
chr3	Q52KR2	NM_001025067	Lrig2	leucine-rich repeats and immunoglobulin-like domains protein 2 isoform 1 precursor	Lrig2	leucine-rich repeats and immunoglobulin-like	2.92025	3.12656		2.80712		2.95131
chr4	A2A7S8-3	NM_001033189	C77080	uncharacterized protein KIAA1522 isoform a	C77080	hypothetical protein LOC97130	3.12069	2.87106			2.83453	2.94209
chrX	Q9D4J7	NM_027642	Phf6	PHD finger protein 6 isoform 1	Phf6	PHD finger protein 6	2.46412	2.38392	2.78411	4.1305		2.94066
chr9	Q62225	NM_009895	Cish	cytokine-inducible SH2-containing protein isoform 1	Cish	cytokine-inducible SH2-containing protein	4.36379		2.81709	2.53725	2.03137	2.93738
chr13	Q542M5	NM_018886	Lgals8	galectin-8 isoform 1	Lgals8	galectin-8	2.47771	3.418			2.90058	2.9321
chr7	NP_035213	NM_011083	Pik3c2a	phosphatidylinositol 4-phosphate 3-kinase C2 domain-containing subunit alpha	Pik3c2a	phosphatidylinositol-4-phosphate 3-kinase C2	2.59325		3.30493	2.89773		2.93197
chr11	Q5NCZ4	NM_029704	Ttc19	tetratricopeptide repeat protein 19, mitochondrial isoform 2	Ttc19	tetratricopeptide repeat protein 19 isoform 2		2.45688	3.62758	2.6997		2.92805
chr15	Q80TA6	NM_172958	Mtmr12	myotubularin-related protein 12	Mtmr12	myotubularin-related protein 12	2.80695		2.33319	2.60363	3.9288	2.91814
chr8	Q922C1	NM_028170	1700030K09Rik	uncharacterized protein C19orf44 homolog	1700030K09Rik	hypothetical protein LOC72254	3.1368		3.02611	2.63952	2.84604	2.91212
chr2	Q8BG15	NM_212450	Ctdspl2	CTD small phosphatase-like protein 2 isoform a	Ctdspl2	CTD small phosphatase-like protein 2	3.04065		2.98125	2.71183		2.91124
chr10	Q6PE78	NM_133672	Vps26a	vacuolar protein sorting-associated protein 26A isoform a	Vps26a	SubName: Full=Vacuolar protein sorting 26 homolog A (Yeast), isoform CRA_e; SubName: Full=Vps26a protein;		2.5532	3.3097		2.85885	2.90725
chr14	Q5Y5T1-2	NM_029492	Zdhhc20	probable palmitoyltransferase ZDHHC20	Zdhhc20	probable palmitoyltransferase ZDHHC20	2.71021	2.78695		2.67084	3.44783	2.90396
chr9	Q3LR78	NM_175537	Zbtb38	zinc finger and BTB domain-containing protein 38	Zbtb38	zinc finger and BTB domain containing 38	3.00773		2.67014		3.03089	2.90292
chr4	Q3TZH7	NM_011527	Tal1	T-cell acute lymphocytic leukemia protein 1 homolog	Tal1	T-cell acute lymphocytic leukemia protein 1	3.22565	2.88532		2.58809		2.89969
chr9		NM_026635	Fam96a	MIP18 family protein FAM96A precursor	Fam96a	Mus musculus adult male kidney cDNA, RIKEN full-length enriched library, clone:0610027P12 product:CDNA: FLJ22875 FIS, CLONE KAT02879 (UNKNOWN) (PROTEIN FOR MGC:14881) homolog [Homo sapiens], full insert sequence.	2.16019	3.22424	2.30295	2.76133	3.98427	2.8866
chr5	B9EJ74	NM_008620	Gbp4	macrophage activation 2 isoform 2	Gbp4	macrophage activation 2	2.05242	3.57911		2.06834	3.82402	2.88097
chr7	Q924W7	NR_037617	St5		St5	suppression of tumorigenicity 5 protein isoform	2.45477	3.87371	2.60277	2.5191		2.86259
chr1	B7X8X0	NM_177164	Vwc2l	von Willebrand factor C domain-containing protein 2-like isoform 1 precursor	Vwc2l	von Willebrand factor C domain-containing	2.7073		2.9934	2.83926		2.84665
chr16	Q3UJF5	NM_011624	Top3b	DNA topoisomerase 3-beta-1	Top3b	DNA topoisomerase 3-beta-1	3.0344	3.73505	2.61793	2.22246	2.54572	2.83111
chr4	Q8BG18	NM_178617	Necab1	N-terminal EF-hand calcium-binding protein 1	Necab1	N-terminal EF-hand calcium-binding protein 1	3.06836		2.61403	2.80402		2.8288
chrX	D3YZK4	NM_001081008	n/a	n/a	Taf1	transcription initiation factor TFIID subunit 1	3.01697	2.87338			2.58607	2.82547
chr2	Q7TNU4	NM_178634	Csrnp3	cysteine/serine-rich nuclear protein 3 isoform a	Csrnp3	SubName: Full=Csrnp3 protein;	2.65617			3.00948	2.7962	2.82062
chr2	Q0VGY8	NM_198294	Tanc1	protein TANC1 isoform a	Tanc1	protein TANC1	3.77563		2.45934		2.20295	2.81264
chr11	Q80ZH7	NM_010716	Lig3	DNA ligase 3 isoform a	Lig3	DNA ligase 3	2.75199			2.61756	3.05078	2.80678
chr10	P35822	NM_008983	Ptprk	receptor-type tyrosine-protein phosphatase kappa precursor	Ptprk	receptor-type tyrosine-protein phosphatase kappa	3.08385		2.85404	2.4667		2.80153
chr16	Q9CQ73	NM_026163	Pkp2	plakophilin-2	Pkp2	plakophilin-2		3.01092	3.34489	2.42243	2.40683	2.79627
chr6	Q9QYB8	NM_013458	Add2	beta-adducin isoform 1	Add2	beta-adducin			3.02	2.68913	2.6344	2.78118
chr14	Q8BJ64	NM_001136240	Chdh	choline dehydrogenase, mitochondrial	Chdh	choline dehydrogenase, mitochondrial precursor	2.92962	2.32084		2.32459	3.5127	2.77194
chr5	NP_081011	NM_026735	Mob1b	MOB kinase activator 1B	Mobkl1a	mps one binder kinase activator-like 1A	2.52158		2.63525	3.13522		2.76402
chr11	Q5NCJ1	NM_175258	Rapgef6	rap guanine nucleotide exchange factor 6 isoform 2	Rapgef6	Rap guanine nucleotide exchange factor (GEF) 6	2.47457		2.1455	3.61988		2.74665
chr16	B2RUQ2	NM_001029889	Usf3	basic helix-loop-helix domain-containing protein USF3	Gm608	hypothetical protein LOC207806	3.20697	2.50124		2.52058		2.74293
chr11	A2AUA9	NM_001159383	Gjc1	gap junction gamma-1 protein	Gjc1	gap junction gamma-1 protein		2.11315		2.30068	3.81451	2.74278
chr9	Q6PIJ4	NM_172766	Nfrkb	nuclear factor related to kappa-B-binding protein	Nfrkb	nuclear factor related to kappa-B-binding	2.12841		2.62302	3.66925	2.4965	2.7293
chr3	NP_598545	NM_133784	Wwtr1	WW domain-containing transcription regulator protein 1 isoform 2	Wwtr1	WW domain-containing transcription regulator	3.18493			2.38623	2.61427	2.72848
chr15		n/a	n/a	n/a	1810021B22Rik	Mus musculus 10 day old male pancreas cDNA, RIKEN full-length enriched library, clone:1810021B22 product:unclassifiable, full insert sequence.		2.47239	2.59783		3.11007	2.72676
chr2	Q8R2U4	NM_170592	Ntmt1	N-terminal Xaa-Pro-Lys N-methyltransferase 1	Mettl11a	RecName: Full=Alpha N-terminal protein methyltransferase 1A; EC=2.1.1.-; AltName: Full=Methyltransferase-like protein 11A; AltName: Full=X-Pro-Lys N-terminal protein methyltransferase 1A; Short=NTM1A;		2.19451	3.35515	2.5581		2.70259
chr11	NP_001157225	NM_001163753	Rab37	ras-related protein Rab-37 isoform 2	Rab37	ras-related protein Rab-37 isoform 2	2.73806	3.24149	2.90365	2.28709	2.30314	2.69469
chr19	Q3UQF1	NM_001035242	Trpm3	transient receptor potential cation channel subfamily M member 3 isoform d	Trpm3	transient receptor potential cation channel,	2.7687		3.28776		2.01653	2.691
chr7		NM_144801	Tmem143	transmembrane protein 143	Tmem143	Mus musculus adult male tongue cDNA, RIKEN full-length enriched library, clone:2310076O21 product:similar to HYPOTHETICAL 51.7 KDA PROTEIN [Homo sapiens] - truncated both ends and frame shifted, full insert sequence.	2.67457	3.62633		2.4188	2.03273	2.68811
chr3	A2CFD7	NM_020505	Vav3	guanine nucleotide exchange factor VAV3 isoform 1	Vav3	guanine nucleotide exchange factor VAV3 isoform		2.56372	3.39024	2.10111		2.68502
chr3	D3Z1R7	NM_022565	Ndst4	bifunctional heparan sulfate N-deacetylase/N-sulfotransferase 4	Ndst4	bifunctional heparan sulfate	4.48982	2.11035	2.00924	2.06911		2.66963
chr2	A2AU04	NM_008397	Itga6	integrin alpha-6 isoform 1 precursor	Itga6	integrin alpha-6	2.83887	2.34861		3.31888	2.17212	2.66962
chr8	Q2PFD7-5	NM_177698	Psd3	PH and SEC7 domain-containing protein 3 isoform 2	Psd3	PH and SEC7 domain-containing protein 3 isoform	2.6004		3.34316	2.03738		2.66031
chr1	Q64151	NM_001126047	Sema4c	semaphorin-4C precursor	Sema4c	semaphorin-4C precursor	2.89808	2.03	3.05097			2.65968
chrX	D3Z613	NM_011252	Rbmx	RNA-binding motif protein, X chromosome	Rbmx	SubName: Full=Putative uncharacterized protein ENSMUSP00000055939;	2.93889	3.10072	2.44825		2.13883	2.65667
chr10	Q69ZK6	NM_207221	Jmjd1c	probable JmjC domain-containing histone demethylation protein 2C isoform 1	Jmjd1c	probable JmjC domain-containing histone	2.44355		2.74524	2.75747		2.64875
chr1		NM_013919	Usp21	ubiquitin carboxyl-terminal hydrolase 21	Usp21	Mus musculus ubiquitin specific protease 16 (Usp16) mRNA, complete cds.	3.1906		2.25498		2.47859	2.64139
chr15	Q3TDA7	NM_001159510	Pacsin2	protein kinase C and casein kinase substrate in neurons protein 2	Pacsin2	protein kinase C and casein kinase substrate in		2.43019		2.85551	2.62096	2.63555
chr9	Q7TN33-2	NM_175235	Celf6	CUGBP Elav-like family member 6 isoform 1	Celf6	CUGBP Elav-like family member 6	2.88666	2.91906			2.02658	2.61077
chr3	A2AE91	NM_001160411	Gstm4	glutathione S-transferase Mu 4 isoform 2	Gstm4	glutathione S-transferase mu 4 isoform 2	2.11361	3.11162	2.1971	2.02075	3.57421	2.60346
chr15	NP_084444	NM_030168	Rictor	rapamycin-insensitive companion of mTOR	Rictor	rapamycin-insensitive companion of mTOR	3.17797		2.2006	2.40421		2.59426
chr12	Q8BPM0-2	NM_172464	Daam1	disheveled-associated activator of morphogenesis 1 isoform a	Daam1	disheveled-associated activator of morphogenesis	2.21761		3.1741		2.38459	2.5921
chr16	NP_001096649	NM_001103179	Brwd1	bromodomain and WD repeat-containing protein 1 isoform B	Brwd1	bromodomain and WD repeat-containing protein 1	2.41223		2.78791	2.5669		2.58901
chr2	Q9CQS9-2	NM_025475	Haus2	HAUS augmin-like complex subunit 2 isoform a	Haus2	RecName: Full=HAUS augmin-like complex subunit 2; AltName: Full=Centrosomal protein of 27 kDa;	2.11785	2.35365		3.29025		2.58725
chr2	Q547J6	NM_007891	E2f1	transcription factor E2F1 isoform a	E2f1	transcription factor E2F1		3.02933	2.86734	2.20122	2.24417	2.58552
chr14	Q3U2E2	NM_144842	Zmym5	zinc finger MYM-type protein 5	Zmym5	zinc finger MYM-type protein 5		3.16685	2.18409	2.39391		2.58162
chr3	Q80T21	NM_144899	Adamtsl4	ADAMTS-like protein 4 precursor	Adamtsl4	ADAMTS-like protein 4 precursor	2.42356	2.19014	2.04208		3.64242	2.57455
chr5	Q6P6M7	NM_172490	Sepsecs	O-phosphoseryl-tRNA(Sec) selenium transferase	Sepsecs	O-phosphoseryl-tRNA(Sec) selenium transferase	3.03046	2.03603	2.64819			2.57156
chr1	NP_775279	NM_173187	2310035C23Rik	lisH domain and HEAT repeat-containing protein KIAA1468 isoform 1	2310035C23Rik	hypothetical protein LOC227446 isoform 1		2.35437	2.85278		2.50386	2.57034
chrX	Q9WV02	NM_001166623	Rbmx	RNA-binding motif protein, X chromosome	Rbmx	RNA binding motif protein, X-linked	2.88596	2.13535	2.67765			2.56632
chr12	B2RUG8	NM_172421	Asxl2	putative Polycomb group protein ASXL2 isoform 2	Asxl2	putative Polycomb group protein ASXL2	2.7034	2.63262	2.35139			2.56247
chr8		NM_008391	Irf2	interferon regulatory factor 2	Irf2	Mus musculus adult male bone cDNA, RIKEN full-length enriched library, clone:9830146E22 product:interferon regulatory factor 2, full insert sequence.	2.90324	2.12161		2.65392		2.55959
chr10		NM_013850	Abca7	ATP-binding cassette sub-family A member 7 isoform 2	Abca7	Mus musculus ATP-binding cassette protein (Abca7) mRNA, partial cds.	2.57638	2.30136			2.79144	2.55639
chr13	Q8JZU6	NM_025831	Pxdc1	PX domain-containing protein 1	1300014I06Rik	PX domain-containing protein C6orf145 homolog	2.60885	2.92585			2.13318	2.55596
chr2	NP_001170871	NM_001177400	Zfp971	ethanol induced 1 isoform 2	Etohi1	ethanol induced 1 isoform 2	2.43932	2.34708	2.48967	2.93513		2.5528
chr13	NP_001182004	NM_001195075	Klhl3	kelch-like protein 3	Klhl3	kelch-like protein 3	2.55949	2.41062	2.91188	2.32612		2.55203
chr8	NP_035872	NM_011742	Zfp1	zinc finger protein 1 isoform 2	Zfp1	zinc finger protein 1 isoform 2			2.63377	2.46699	2.55307	2.55128
chr17_random		n/a	n/a	n/a	n/a	Mus musculus cDNA, clone:Y1G0106B04, strand:minus, reference:ENSEMBL:Mouse-Transcript-ENST:ENSMUST00000002436, based on BLAT search.	2.30776	2.79109	2.52101		2.58215	2.5505
chr13	A2CG63-2	NM_198122	Arid4b	AT-rich interactive domain-containing protein 4B isoform 2	Arid4b	AT-rich interactive domain-containing protein 4B		2.16969	2.98352	2.37943	2.6511	2.54594
chr8	Q9ERT2	NM_133202	Trhr2	thyrotropin releasing hormone receptor 2	Trhr2	thyrotropin releasing hormone receptor 2		2.39242	2.36786	2.87391		2.54473
chr18	Q6P926-3	NM_027733	Spata24	spermatogenesis-associated protein 24 isoform 1	Spata24	spermatogenesis-associated protein 24 isoform 1		2.649	2.20781	3.25635	2.01771	2.53272
chr13		NM_001081051	D130043K22Rik	dyslexia-associated protein KIAA0319 homolog precursor	D130043K22Rik	Mus musculus 12 days embryo spinal ganglion cDNA, RIKEN full-length enriched library, clone:D130043K22 product:hypothetical PKD domain containing protein, full insert sequence.		2.39489		3.03157	2.14141	2.52262
chr12	Q8BHZ0	NM_029758	Fam49a	protein FAM49A	Fam49a	family with sequence similarity 49, member A	2.13792	3.19377	2.2157			2.5158
chr6	NP_001184251	NM_001197322	Foxp1	forkhead box protein P1 isoform 3	Foxp1	forkhead box protein P1 isoform 3		3.20524	2.04056		2.2785	2.5081
chr2	Q4FK28	NM_007398	Ada	adenosine deaminase	Ada	adenosine deaminase		2.6471		2.48027	2.39608	2.50782
chr6	NP_082157	NM_027881	Osbpl3	oxysterol-binding protein-related protein 3 isoform 1	Osbpl3	oxysterol-binding protein-related protein 3	2.12834	2.69929	2.68953			2.50572
chrX	Q8CD19	NM_173414	Lancl3	lanC-like protein 3	Lancl3	lanC-like protein 3	2.50556		2.76962	2.23377		2.50298
chr13	Q8CGC9	NM_010829	Msh3	DNA mismatch repair protein Msh3 isoform 1	Msh3	DNA mismatch repair protein Msh3		2.28023		2.50004	2.7126	2.49762
chr1	NP_945150	NM_198932	Pou2f1	POU domain, class 2, transcription factor 1 isoform Z	Pou2f1	POU domain, class 2, transcription factor 1		2.27695	2.86042	2.34347		2.49361
chr19	Q9WU62	NM_016692	Incenp	inner centromere protein	Incenp	inner centromere protein	2.28082	2.70288			2.46244	2.48205
chr1	Q8R007	NM_027893	Nectin4	nectin-4 isoform a precursor	Pvrl4	poliovirus receptor-related protein 4 isoform a		2.62983	2.73829	2.15557	2.39222	2.47898
chr8	Q80Y32	NM_178017	Hmgxb4	HMG domain-containing protein 4 isoform 1	Hmgxb4	HMG domain-containing protein 4	2.0102	2.60503	2.2888	3.0027		2.47668
chrX		NM_001081385	n/a	n/a	Pcdh11x	Mus musculus mRNA for protocadherin (PCDHX gene).	2.14403		3.12941	2.14421		2.47255
chr18	Q76LL6-2	NM_175276	Fhod3	FH1/FH2 domain-containing protein 3 isoform 1	Fhod3	FH1/FH2 domain-containing protein 3	2.87785		2.39932	2.12459		2.46725
chr9	NP_001171637	NM_001184708	Tfdp2	transcription factor Dp-2 isoform B	Tfdp2	transcription factor Dp-2 isoform B		2.17375	3.05793		2.15639	2.46269
chr8	NP_001161418	NM_001167946	Zfp821	zinc finger protein 821 isoform a	Zfp821	zinc finger protein 821	2.0179	2.4603		2.90306		2.46042
chrY	Q62240	NM_011419	Kdm5d	lysine-specific demethylase 5D	Kdm5d	lysine-specific demethylase 5D	2.45214	2.39264	2.53305			2.45928
chr6	NP_848478	NM_178391	Setmar	histone-lysine N-methyltransferase SETMAR isoform 1	Setmar	histone-lysine N-methyltransferase SETMAR	2.61971	2.43103			2.28239	2.44438
chr8	Q08024	NM_022309	Cbfb	core-binding factor subunit beta isoform 1	Cbfb	core-binding factor subunit beta isoform 1	2.12787		3.24148	2.12624	2.26594	2.44038
chr2	A2BHR4	NM_173750	Arl14ep	ARL14 effector protein	2700007P21Rik	hypothetical protein LOC212772		2.88206	2.07784	2.3056		2.42183
chr7	Q8R429	NM_007504	Atp2a1	sarcoplasmic/endoplasmic reticulum calcium ATPase 1	Atp2a1	sarcoplasmic/endoplasmic reticulum calcium		2.02241	3.17658	2.0572		2.41873
chr18	Q8BUY9	NM_172627	Pggt1b	geranylgeranyl transferase type-1 subunit beta	Pggt1b	geranylgeranyl transferase type-1 subunit beta	2.54523		2.3492	2.34855		2.41433
chr5	Q80TS3-3	NM_198702	Adgrl3	adhesion G protein-coupled receptor L3 isoform 1 precursor	Lphn3	latrophilin-3	3.16869	2.03791		2.03621		2.41427
chr2	NP_941955	NM_198683	Celf1	CUGBP Elav-like family member 1 isoform 2	Celf1	CUGBP Elav-like family member 1 isoform 2	2.73265		2.36246	2.14704		2.41405
chr2		n/a	n/a	n/a	n/a	Mus musculus adult male testis cDNA, RIKEN full-length enriched library, clone:4930434A07 product:unclassifiable, full insert sequence.	2.14013			2.62518	2.45159	2.40563
chr4		NM_016693	Map3k6	mitogen-activated protein kinase kinase kinase 6	Map3k6	Mus musculus ASK2 mRNA for apoptosis signal-regulating kinase 2, complete cds.	2.13394			2.23444	2.82203	2.3968
chr7	Q922J9	NM_027379	Far1	fatty acyl-CoA reductase 1 isoform 1	Far1	RecName: Full=Fatty acyl-CoA reductase 1; EC=1.2.1.n2; AltName: Full=Male sterility domain-containing protein 2;	2.05145		2.56457	2.57251		2.39618
chr16		n/a	n/a	n/a	RP24-345H5.2	Mus musculus adult male liver tumor cDNA, RIKEN full-length enriched library, clone:C730010C06 product:unclassifiable, full insert sequence.		2.43992	2.34814		2.39161	2.39322
chr11	Q6T264	NM_175334	Maml1	mastermind-like protein 1	Maml1	mastermind-like protein 1	2.29608	2.55684		2.32237		2.39176
chr9	Q8BWL5-5	NM_001172121	Rbms3	RNA-binding motif, single-stranded-interacting protein 3 isoform 4	Rbms3	RNA-binding motif, single-stranded-interacting		2.61444	2.53107	2.02688		2.3908
chr13	A1L353	NM_009369	Tgfbi	transforming growth factor-beta-induced protein ig-h3 precursor	Tgfbi	transforming growth factor-beta-induced protein	2.79092	2.08602			2.26945	2.38213
chr9	Q8K272	NM_001042607	Ryk	tyrosine-protein kinase RYK isoform 2 precursor	Ryk	SubName: Full=Ryk protein;	2.264	2.33049			2.55078	2.38176
chr1	Q8QZY7	NM_001077404	Nrp2	neuropilin-2 isoform 2 precursor	Nrp2	neuropilin-2 isoform 2 precursor	2.90358		2.22515	2.00767		2.3788
chr8	Q8BGK6	NM_178798	Slc7a6	Y+L amino acid transporter 2	Slc7a6	RecName: Full=Y+L amino acid transporter 2; AltName: Full=Solute carrier family 7 member 6; AltName: Full=y(+)L-type amino acid transporter 2; Short=Y+LAT2; Short=y+LAT-2;	2.4281			2.34058	2.33966	2.36945
chr3	NP_001074608	NM_001081139	Ankrd35	ankyrin repeat domain-containing protein 35	Ankrd35	ankyrin repeat domain-containing protein 35	3.15754		2.17045	2.09605	2.04038	2.36611
chr3		n/a	n/a	n/a	4930570G19Rik	Mus musculus adult male testis cDNA, RIKEN full-length enriched library, clone:4930570G19 product:unclassifiable, full insert sequence.		2.09881		2.7861	2.20471	2.36321
chr7	Q4QQK7	NM_178706	Siglech	sialic acid binding Ig-like lectin H isoform 1 precursor	Siglech	sialic acid binding Ig-like lectin H		2.37041	2.21813	2.82068	2.02925	2.35962
chr10	Q925T6-2	NM_133442	Grip1	glutamate receptor-interacting protein 1 isoform 3	Grip1	glutamate receptor-interacting protein 1 isoform		2.22872	2.57197		2.27546	2.35872
chr4	A2A9K2	NM_144527	Cep85	centrosomal protein of 85 kDa	Ccdc21	coiled-coil domain-containing protein 21			2.3612	2.42238	2.27852	2.35403
chr2	Q543N0	NM_080562	Ubox5	RING finger protein 37	Ubox5	RING finger protein 37		2.24164		2.67629	2.12105	2.34633
chr3	Q3TXB7	NM_007899	Ecm1	extracellular matrix protein 1 isoform 1 precursor	Ecm1	extracellular matrix protein 1 precursor	2.41857	2.48204		2.12347		2.34136
chr3	Q8CCH2	NM_172501	Nhlrc3	NHL repeat-containing protein 3 precursor	Nhlrc3	NHL repeat-containing protein 3 precursor	2.26189	2.10754		2.63929		2.33624
chr8	Q9JKQ4	NM_018826	Irx5	iroquois-class homeodomain protein IRX-5	Irx5	iroquois-class homeodomain protein IRX-5	2.60478			2.10966	2.25671	2.32372
chr18	Q6KAS7	NM_145492	Zfp521	zinc finger protein 521	Zfp521	zinc finger protein 521	2.46727	2.07206		2.42822		2.32252
chr12		n/a	n/a	n/a	Gm9866	Mus musculus adult retina cDNA, RIKEN full-length enriched library, clone:A930017G19 product:hypothetical protein, full insert sequence.	2.00187		2.81605	2.12142		2.31311
chr3	P52793	NM_010107	Efna1	ephrin-A1 isoform 1 precursor	Efna1	ephrin-A1 isoform 1	2.87746		2.00166	2.24663	2.11524	2.31025
chr12	Q80X41-2	NM_001029844	Vrk1	serine/threonine-protein kinase VRK1 isoform c	Vrk1	serine/threonine-protein kinase VRK1 isoform c	2.062	2.38143	2.45538		2.3309	2.30743
chr5	Q8BH82	NM_178728	Napepld	N-acyl-phosphatidylethanolamine-hydrolyzing phospholipase D	Napepld	N-acyl-phosphatidylethanolamine-hydrolyzing	2.27862	2.26398	2.35727		2.32821	2.30702
chr3		n/a	n/a	n/a	4632404H12Rik	Mus musculus 0 day neonate skin cDNA, RIKEN full-length enriched library, clone:4632404H12 product:hypothetical protein, full insert sequence.	2.37998	2.45702		2.07316		2.30339
chr11	Q8BLF2-2	NM_001166654	Cdkl3	cyclin-dependent kinase-like 3 isoform 3	Cdkl3	cyclin-dependent kinase-like 3 isoform 3		2.11151		2.32118	2.42944	2.28738
chrX		NR_015467	5530601H04Rik		5530601H04Rik	Mus musculus 10 days neonate head cDNA, RIKEN full-length enriched library, clone:5530601H04 product:RIKEN cDNA 5530601H04 gene, full insert sequence.		2.11046		2.53916	2.20051	2.28338
chr17	B9EHS6	NM_008549	Man2a1	alpha-mannosidase 2	Man2a1	alpha-mannosidase 2	2.76995	2.05477	2.00377			2.27616
chr4		NM_001163721	Smim1	small integral membrane protein 1	1190007F08Rik	Mus musculus adult male kidney cDNA, RIKEN full-length enriched library, clone:0610011H04 product:unclassifiable, full insert sequence.		2.0664	2.12591	2.62361		2.27197
chr10	B2RUB9	NM_011605	Tmpo	lamina-associated polypeptide 2 isoform alpha	Tmpo	lamina-associated polypeptide 2 isoform alpha	2.17399	2.03181	2.24262	2.63665		2.27127
chr4	Q8BIY1	NM_172876	Gpatch3	G patch domain-containing protein 3	Gpatch3	RecName: Full=G patch domain-containing protein 3;		2.08069		2.24384	2.4833	2.26928
chr14	Q6NZN0-4	NM_134077	Rbm26	RNA-binding protein 26	Rbm26	RNA-binding protein 26	2.15793		2.50596	2.13752	2.27051	2.26798
chrX	A2AIH9	NM_027153	Pir	pirin isoform 1	Pir	pirin	2.52492		2.01915		2.25957	2.26788
chr1	Q9Z1T6	NM_011086	Pikfyve	1-phosphatidylinositol 3-phosphate 5-kinase isoform 2	Pikfyve	1-phosphatidylinositol-3-phosphate 5-kinase	2.56452		2.16241	2.07078		2.2659
chr12	Q99N13-2	NM_024124	Hdac9	histone deacetylase 9 isoform 2	Hdac9	histone deacetylase 9	2.35957	2.384			2.02601	2.25653
chr10	Q3T9Z9	NM_028287	Zufsp	zinc finger with UFM1-specific peptidase domain protein	Zufsp	zinc finger with UFM1-specific peptidase domain			2.17346	2.38196	2.17879	2.24474
chr3	NP_001074880	NM_001081411	Sclt1	sodium channel and clathrin linker 1	Sclt1	sodium channel and clathrin linker 1	2.124		2.20767	2.40009		2.24392
chr4	B1AXH9	NM_009822	Runx1t1	protein CBFA2T1 isoform 3	Runx1t1	protein CBFA2T1 isoform 3			2.06193	2.41103	2.2058	2.22625
chr1	Q148A0	NM_173868	St18	suppression of tumorigenicity 18 protein	St18	suppression of tumorigenicity 18 protein	2.29636		2.1643	2.13663		2.1991
chr12	NP_001157842	NM_001164370	Mipol1	mirror-image polydactyly gene 1 protein homolog	Mipol1	mirror-image polydactyly gene 1 protein homolog	2.21935	2.20485			2.16853	2.19758
chr5	NP_775578	NM_173402	Rgs12	regulator of G-protein signaling 12 isoform A	Rgs12	regulator of G-protein signalling 12 isoform A	2.08607		2.09685	2.39738		2.19343
chr17	B8JJZ7	NM_207541	Zfp81	zinc finger protein 81	Zfp81	zinc finger protein 81	2.29615		2.2034	2.00889		2.16948
chr6	Q99LB4	NM_007599	Capg	macrophage-capping protein	Capg	macrophage-capping protein isoform 1	2.16335	2.10704		2.23748		2.16929
chr10	NP_001103483	NM_001110013	Tmtc3	transmembrane and TPR repeat-containing protein 3 isoform 1	Tmtc3	transmembrane and TPR repeat-containing protein	2.11347	2.20659		2.15791		2.15932
chr1	Q812G4	NM_207653	Cflar	CASP8 and FADD-like apoptosis regulator isoform 1	Cflar	CASP8 and FADD-like apoptosis regulator isoform		2.06657	2.13467	2.25454		2.15193
chr7	Q9D009	NM_026010	Lipt2	putative lipoyltransferase 2, mitochondrial	Lipt2	putative lipoyltransferase 2, mitochondrial	2.04396	2.37919	2.03141			2.15152
chr7	Q9D5P0	n/a	n/a	n/a	9330171B17Rik	SubName: Full=MCG147196; SubName: Full=Putative uncharacterized protein;	2.22491	2.01651			2.19803	2.14648
chr7	Q8CCP6	NM_018791	Zfp108	zinc finger protein 108	Zfp108	zinc finger protein 108		2.06988	2.23909	2.09828		2.13575
chr18	NP_808496	NM_177828	Arhgef37	rho guanine nucleotide exchange factor 37	Arhgef37	rho guanine nucleotide exchange factor 37		2.02572	2.03494	2.24315	2.11798	2.10545
chr13	Q4QQP3	NM_183146	Zfp729a	uncharacterized protein LOC212281	A530054K11Rik	hypothetical protein LOC212281	2.12023		2.0231	2.0705		2.07128
chr1	NP_080095	NM_025819	Swt1	transcriptional protein SWT1	1200016B10Rik	hypothetical protein LOC66875		2.01368	2.10603	2.01885		2.04619

## Sheet: H1N1+Mn only
Gene.chrom	Gene.proteinID	RefSeq.value	refLink.name	refLink.product	GeneName.value	Description	Data has been reduced to values >2 FPKM and group mean on 3 or more samples
H1N1+Mn							H1N1+Mn				MEAN
chr8		n/a	n/a	n/a	n/a	Mus musculus cDNA, clone:Y1G0115A16, strand:unspecified.	127.693	108.783		101.816	112.764
chr17	Q3TWR2	NM_019439	Gabbr1	gamma-aminobutyric acid type B receptor subunit 1 precursor	Gabbr1	SubName: Full=Putative uncharacterized protein;	85.2655	62.6319			73.9487
chr7		NR_000004	Snord35b		Snord35b	Mus musculus small nucleolar RNA, C/D box 35B (Snord35b), small nucleolar RNA.			49.552	95.6455	72.5987
chr13		NR_037235	Mir3074-1		AC130827.1	Mus musculus microRNA 3074-1 (Mir3074-1), microRNA.	49.7496	89.3697			69.5597
chr7	Q3TP62	NM_001163185	Plekhb1	pleckstrin homology domain-containing family B member 1 isoform d	Plekhb1	pleckstrin homology domain-containing family B		70.0881	58.7025		64.3953
chr3		NR_037276	Mir3093		AC044864.2	Mus musculus microRNA 3093 (Mir3093), microRNA.			47.3094	45.6877	46.4985
chr14		n/a	n/a	n/a	n/a	Mus musculus cDNA, clone:Y2G0101J20, strand:minus, reference:ENSEMBL:Mouse-Transcript-ENST:ENSMUST00000015800, based on BLAT search.			37.4163	52.4501	44.9332
chr6		n/a	n/a	n/a	n/a	Mus musculus cDNA, clone:Y2G0101J20, strand:minus, reference:ENSEMBL:Mouse-Transcript-ENST:ENSMUST00000015800, based on BLAT search.			37.4163	52.4501	44.9332
chr2	Q8R3V5	NM_139302	Sh3glb2	endophilin-B2 isoform 2	Sh3glb2	endophilin-B2		40.6272	46.308		43.4676
chr9		NR_028548	Snord16a		Snord16a	Mus musculus small nucleolar RNA, C/D box 16A (Snord16a), small nucleolar RNA.			39.5807	38.3126	38.9467
chr15		NM_010738	Ly6a	lymphocyte antigen 6A-2/6E-1 precursor	Ly6a	Mus musculus 18 days pregnant adult female placenta and extra embryonic tissue cDNA, RIKEN full-length enriched library, clone:3830430N17 product:lymphocyte antigen 6 complex, locus A, full insert sequence.	34.4599			29.9794	32.2197
chr12		NR_029773	Mir345		Mir345	Mus musculus microRNA 345 (Mir345), microRNA.	30.9456		32.112		31.5288
chr17	Q9ESN9-2	NM_001163451	Mapk8ip3	C-Jun-amino-terminal kinase-interacting protein 3 isoform f	Mapk8ip3	C-Jun-amino-terminal kinase-interacting protein		37.5495	22.2464		29.898
chr17	Q9ESN9-5	NM_001163448	Mapk8ip3	C-Jun-amino-terminal kinase-interacting protein 3 isoform c	Mapk8ip3	C-Jun-amino-terminal kinase-interacting protein		23.1122		34.6004	28.8563
chr16	Q80Y45	NM_001001983	Pi4ka	phosphatidylinositol 4-kinase alpha	Pi4ka	SubName: Full=Pik4ca protein; Flags: Fragment;	27.3014		27.3873		27.3443
chr11	Q78NS1	NM_024226	Rtn4	reticulon-4 isoform C	Rtn4	reticulon-4 isoform C	28.9779		23.8746		26.4263
chr9		NM_001165902	Ctnnb1	catenin beta-1	Ctnnb1	Mus musculus adult male colon cDNA, RIKEN full-length enriched library, clone:9030417H18 product:catenin beta, full insert sequence.	23.4571		29.5665	23.0803	25.368
chr4	NP_035466	NM_011336	Ccl27a	C-C motif chemokine 27 isoform 2 precursor	Ccl27a	C-C motif chemokine 27 isoform 2	24.2878			24.2426	24.2652
chr10	Q66L44	NM_001195268	Cbarp	voltage-dependent calcium channel beta subunit-associated regulatory protein	Dos	RecName: Full=Protein Dos; AltName: Full=Downstream of Stk11 protein;	31.0066		16.8876		23.9471
chr8	Q78YZ6-2	NM_019708	Scoc	short coiled-coil protein isoform b	Scoc	short coiled-coil protein isoform b	21.7755		23.8011		22.7883
chrX		NR_002899	Snora70		Snora70	Mus musculus small nucleolar RNA, H/ACA box 70 (Snora70), small nucleolar RNA.	10.2517	36.8321	21.0829		22.7222
chr10	NP_001171247	NM_001177776	Ahi1	jouberin isoform 2	Ahi1	jouberin isoform 2	31.8072		23.1711	12.12	22.3661
chr5	P57759	NM_026129	Erp29	endoplasmic reticulum resident protein 29 precursor	Erp29	RecName: Full=Endoplasmic reticulum resident protein 29; Short=ERp29; Flags: Precursor;	21.6843	18.5369			20.1106
chr4		NM_020569	Park7	protein DJ-1	Park7	Mus musculus mRNA for DJ-1, complete cds.			26.9608	12.4671	19.714
chr12		NR_035429	Mir1197		Mir1197	Mus musculus microRNA 1197 (Mir1197), microRNA.		24.0299		13.4692	18.7495
chr11	Q8R570	NM_144521	Snap47	synaptosomal-associated protein 47	Snap47	synaptosomal-associated protein 47	19.1053	15.5157			17.3105
chr11	B1ASX0	NM_011065	Per1	period circadian protein homolog 1	Per1	period circadian protein homolog 1		16.3718	17.5388		16.9553
chr3	Q3TPH5	NM_018804	Syt11	synaptotagmin-11	Syt11	synaptotagmin-11	16.1772	17.4998	16.9124		16.8631
chr3	NP_659147	NM_144898	Msto1	protein misato homolog 1	Msto1	protein misato homolog 1	16.0095	17.2745	16.7985		16.6942
chr15	Q91W01	NM_013872	Pmm1	phosphomannomutase 1 isoform 1	Pmm1	SubName: Full=Pmm1 protein;	13.0958	21.7533		10.5095	15.1195
chr9	P27546	NM_008633	Map4	microtubule-associated protein 4 isoform 2	Mtap4	microtubule-associated protein 4		13.2192		16.9872	15.1032
chr18	Q91WA4	NM_133687	Cxxc5	CXXC-type zinc finger protein 5	Cxxc5	CXXC-type zinc finger protein 5	11.2231	15.6696			13.4464
chr1		n/a	n/a	n/a	n/a	Mus musculus cDNA, clone:Y0G0111C24, strand:unspecified.	15.0073			11.7245	13.3659
chr3	Q8C437-4	NM_001163517	Pex5l	PEX5-related protein isoform 3	Pex5l	PEX5-related protein isoform 3	11.0604		15.16	13.5352	13.2519
chr18	Q7TSY6-4	NM_001146293	Celf4	CUGBP Elav-like family member 4 isoform B	Celf4	CUGBP Elav-like family member 4 isoform F	17.021	9.10752			13.0643
chr4	A2ANP3	NM_027993	Fam219a	protein FAM219A isoform 2	2310028H24Rik	hypothetical protein LOC71901 isoform 2		15.1663	10.6897		12.928
chr9	Q3U518	NM_008925	Prkcsh	glucosidase 2 subunit beta isoform 2 precursor	Prkcsh	glucosidase 2 subunit beta precursor	15.6853		9.92436		12.8048
chr1	Q69ZP3-4	NM_019999	Pnkd	probable hydrolase PNKD isoform 1	Pnkd	probable hydrolase PNKD isoform 1	13.7348			11.5047	12.6197
chr11	B0QZH4	NM_001190378	Camta2	calmodulin-binding transcription activator 2 isoform 3	Camta2	calmodulin-binding transcription activator 2	16.7318		7.34806		12.0399
chr10	Q8VC68	NM_170688	Ank3	ankyrin-3 isoform c	Ank3	ankyrin 3, epithelial isoform c		10.6425		13.3223	11.9824
chr3	Q62393-2	NM_009412	Tpd52	tumor protein D52 isoform 5	Tpd52	tumor protein D52 isoform 5	6.69948	22.0712	10.8686	8.21398	11.9633
chr2		NM_001177837	Smox	spermine oxidase isoform f	Smox	spermine oxidase isoform h		11.175	12.7478		11.9614
chr2		n/a	n/a	n/a	1700011J10Rik	Mus musculus adult male testis cDNA, RIKEN full-length enriched library, clone:1700011J10 product:hypothetical protein, full insert sequence.	13.2031		10.4912		11.8471
chr5	O08532-5	NM_001110844	Cacna2d1	voltage-dependent calcium channel subunit alpha-2/delta-1 isoform b preproprotein	Cacna2d1	voltage-dependent calcium channel subunit	12.7848	10.6411			11.7129
chr11	Q3TYD4-2	NM_001166177	Arsg	arylsulfatase G isoform 2	Arsg	arylsulfatase G isoform 2	8.8983		14.0258		11.4621
chr9	Q9WVS7-2	NM_011840	Map2k5	dual specificity mitogen-activated protein kinase kinase 5	Map2k5	dual specificity mitogen-activated protein	12.7171	9.6322			11.1746
chr13	Q3UHE3	NM_008745	Ntrk2	BDNF/NT-3 growth factors receptor isoform b precursor	Ntrk2	BDNF/NT-3 growth factors receptor isoform b		12.9945		9.06155	11.028
chr1	Q3T9T1	NM_178874	Tmcc2	transmembrane and coiled-coil domains protein 2 isoform 1	Tmcc2	transmembrane and coiled-coil domains protein 2	10.9183		11.0202		10.9693
chr1	Q8K2T9	NM_133780	Tpr	nucleoprotein TPR	Tpr	SubName: Full=Tpr protein;	10.2029	14.4083		7.21791	10.6097
chr1	NP_001129694	NM_001136222	Acsl3	long-chain-fatty-acid--CoA ligase 3 isoform b	Acsl3	long-chain-fatty-acid--CoA ligase 3 isoform b	10.3839			10.8018	10.5929
chr11	NP_001039429	NM_001045964	Mink1	misshapen-like kinase 1 isoform 4	Mink1	misshapen-like kinase 1 isoform 4	9.22351	13.489	8.6794		10.464
chr8	P0CG14	NM_145412	Chtf8	chromosome transmission fidelity protein 8 homolog	Chtf8	RecName: Full=Chromosome transmission fidelity protein 8 homolog isoform 2;	5.33139	13.1532	9.92093	13.1199	10.3814
chr10	Q8BPI6	NM_008786	Pcmt1	protein-L-isoaspartate(D-aspartate) O-methyltransferase isoform 2	Pcmt1	RecName: Full=Protein-L-isoaspartate O-methyltransferase; EC=2.1.1.77; Flags: Fragment;		11.0185	9.72197	9.99444	10.245
chr16		NM_026909	Thap7	THAP domain-containing protein 7	Thap7	Mus musculus 10 day old male pancreas cDNA, RIKEN full-length enriched library, clone:1810004B07 product:THAP domain containing 7, full insert sequence.	8.29873	11.9778			10.1383
chr12	A3KML3	NM_011739	Ywhaq	14-3-3 protein theta	Ywhaq	14-3-3 protein theta	9.84683		9.80814		9.82748
chr7	B7ZC53	NM_008748	Dusp8	dual specificity protein phosphatase 8	Dusp8	dual specificity protein phosphatase 8			9.6498	8.78894	9.21937
chr3		NM_001111051	Dclk1	serine/threonine-protein kinase DCLK1 isoform 2	Dclk1	Mus musculus mRNA for mKIAA0369 protein.	10.1771		7.82094		8.99902
chrX	Q9R1K9	NM_019405	Cetn2	centrin-2	Cetn2	centrin-2	11.1941	10.0545		5.60878	8.95246
chr19	Q8VD62	NR_024189	n/a	n/a	AI837181	RecName: Full=UPF0696 protein C11orf68 homolog; AltName: Full=Basophilic leukemia-expressed protein Bles03; AltName: Full=Protein WF-3;	7.14843		10.7254		8.93692
chr10	Q80TM6-2	NM_001168292	R3hdm2	R3H domain-containing protein 2 isoform 1	R3hdm2	R3H domain-containing protein 2 isoform 1		9.90008	9.06522	7.55221	8.83917
chr13	Q62158	NM_009054	Trim27	zinc finger protein RFP	Trim27	RecName: Full=Zinc finger protein RFP; AltName: Full=Ret finger protein; AltName: Full=Tripartite motif-containing protein 27;	9.34534	7.90655			8.62594
chr1	Q9CQC6	NM_025824	Bzw1	basic leucine zipper and W2 domain-containing protein 1	Bzw1	basic leucine zipper and W2 domain-containing	5.90394	11.2057			8.55482
chr7	Q3TGG2	NM_183020	Atxn2l	ataxin-2-like protein isoform 1	Atxn2l	ataxin-2-like protein			8.35493	8.42046	8.3877
chr19	Q9CXX9	NM_024192	Cuedc2	CUE domain-containing protein 2 isoform a	Cuedc2	CUE domain-containing protein 2 isoform a	10.4302			6.22011	8.32515
chr9	Q61532	NM_027418	Mapk6	mitogen-activated protein kinase 6	Mapk6	mitogen-activated protein kinase 6	9.32552		12.5024	3.06413	8.29735
chr4	Q8C460-2	NM_080469	Eri3	ERI1 exoribonuclease 3 isoform a	Eri3	RecName: Full=ERI1 exoribonuclease 3; EC=3.1.-.-; AltName: Full=Prion interactor 1; AltName: Full=Prion protein-interacting protein;	8.629	8.33799		7.65013	8.20571
chr11	Q5SRX1	NM_153080	Tom1l2	TOM1-like protein 2 isoform a	Tom1l2	TOM1-like protein 2 isoform a		9.57808	8.62501	6.27601	8.1597
chr10	Q8K019-2	NM_153787	Bclaf1	bcl-2-associated transcription factor 1 isoform 2	Bclaf1	bcl-2-associated transcription factor 1 isoform	6.23295	13.8971	3.96649	8.39511	8.12291
chr16	Q8K1M6-4	NM_001025947	Dnm1l	dynamin-1-like protein isoform b	Dnm1l	RecName: Full=Dynamin-1-like protein; EC=3.6.5.5; AltName: Full=Dynamin family member proline-rich carboxyl-terminal domain less; Short=Dymple; AltName: Full=Dynamin-related protein 1;		8.82425	7.35583		8.09004
chr15	Q9CQJ5	NM_001170911	Prr13	proline-rich protein 13	Prr13	proline-rich protein 13		11.1323	5.78441	7.30089	8.07253
chr8	Q3V3X3	NM_009361	Tfdp1	transcription factor Dp-1 isoform a	Tfdp1	transcription factor Dp-1		8.13745	7.90204		8.01975
chr5	Q8BIW6	NM_172887	Fry	protein furry homolog	Fry	SubName: Full=Putative uncharacterized protein;	9.75974		6.69461	7.57019	8.00818
chr2	Q9JMG4-2	NM_001141933	Nkain4	sodium/potassium-transporting ATPase subunit beta-1-interacting protein 4 isoform 2 precursor	Nkain4	sodium/potassium-transporting ATPase subunit			6.9217	8.98967	7.95569
chr12	Q3UH55	NM_008445	Kif3c	kinesin-like protein KIF3C	Kif3c	kinesin-like protein KIF3C	8.79601		7.09814		7.94707
chr10		NM_133668	Slc25a3	phosphate carrier protein, mitochondrial precursor	Slc25a3	Mus musculus adult male brain cDNA, RIKEN full-length enriched library, clone:3526402M16 product:solute carrier family 25 (mitochondrial carrier; adenine nucleotide translocator), member 3, full insert sequence.		7.06815	8.81827		7.94321
chr10	D3Z4T5	NM_010768	Matk	megakaryocyte-associated tyrosine-protein kinase isoform 1	Matk	megakaryocyte-associated tyrosine-protein	8.26542	7.26238	10.6838	5.4168	7.9071
chr6		NR_024619	2610001J05Rik		2610001J05Rik	Mus musculus adult male kidney cDNA, RIKEN full-length enriched library, clone:0610037B04 product:hypothetical protein, full insert sequence.		6.40088	8.42916	8.52239	7.78414
chr2	Q9QWU3	NM_008230	Hdc	histidine decarboxylase	Hdc	histidine decarboxylase	8.59475	12.4563	2.25737		7.76947
chr6	Q3TDH8	NM_133926	Camk1	calcium/calmodulin-dependent protein kinase type 1	Camk1	SubName: Full=Putative uncharacterized protein;	8.43794			6.61532	7.52663
chr8	D3YWC9	NM_198625	Mtss1l	MTSS1-like protein isoform 1	Mtss1l	MTSS1-like protein			5.76905	9.24525	7.50715
chr8	Q8CE90-7	NM_001042557	Map2k7	dual specificity mitogen-activated protein kinase kinase 7 isoform 1	Map2k7	dual specificity mitogen-activated protein		7.32578	7.55276		7.43927
chr14	Q7TMY4	NM_025435	Thoc7	THO complex subunit 7 homolog isoform 1	Thoc7	THO complex subunit 7 homolog isoform 1	8.16232	6.67104			7.41668
chr15	Q60700	NM_001163643	Map3k12	mitogen-activated protein kinase kinase kinase 12	Map3k12	mitogen-activated protein kinase kinase kinase		9.71579		4.91264	7.31421
chr4	Q80TZ3-2	NM_001164585	Dnajc6	putative tyrosine-protein phosphatase auxilin isoform c	Dnajc6	putative tyrosine-protein phosphatase auxilin		9.91228		4.55817	7.23522
chrX	Q9JJJ7-3	NM_145907	Porcn	protein-serine O-palmitoleoyltransferase porcupine isoform C	Porcn	probable protein-cysteine N-palmitoyltransferase	8.4128		6.04582		7.22931
chr15		NM_025673	Golph3	Golgi phosphoprotein 3	Golph3	Mus musculus Golph3 mRNA for golgi phosphoprotein 3 short variant, complete cds.	7.90063		6.3951		7.14786
chr11	Q5QNU3	NM_019400	Rabep1	rab GTPase-binding effector protein 1 isoform 1	Rabep1	rab GTPase-binding effector protein 1		6.75893		7.5283	7.14362
chr13	Q8BLM5	NM_026211	Tmed9	transmembrane emp24 domain-containing protein 9 precursor	Tmed9	transmembrane emp24 domain-containing protein 9	7.97704	5.29215	10.558	4.69638	7.13089
chr8	Q9D385-2	NM_024191	Arl2bp	ADP-ribosylation factor-like protein 2-binding protein isoform 1	Arl2bp	ADP-ribosylation factor-like protein 2-binding	7.87524			6.12937	7.0023
chr5	Q9Z1Z0-4	NM_019490	Uso1	general vesicular transport factor p115	Uso1	RecName: Full=General vesicular transport factor p115; AltName: Full=Protein USO1 homolog; AltName: Full=Transcytosis-associated protein; Short=TAP; AltName: Full=Vesicle-docking protein;	5.02086		8.93405		6.97745
chr14	Q3UHH1-2	NM_027996	Zswim8	zinc finger SWIM domain-containing protein 8 isoform 1	2310021P13Rik	hypothetical protein LOC268721		6.09358	7.81465		6.95411
chr18	Q9D0D3	NM_026157	Mtpap	poly(A) RNA polymerase, mitochondrial precursor	Mtpap	RecName: Full=Poly(A) RNA polymerase, mitochondrial; Short=PAP; EC=2.7.7.19; AltName: Full=PAP-associated domain-containing protein 1; AltName: Full=Polynucleotide adenylyltransferase; Flags: Precursor;		6.70182	7.18116		6.94149
chr6	Q66JT6	NM_011666	Uba3	NEDD8-activating enzyme E1 catalytic subunit isoform 1	Uba3	NEDD8-activating enzyme E1 catalytic subunit		4.98485	8.71309		6.84897
chr13	Q8C297	NM_025387	Tmem14c	transmembrane protein 14C	Tmem14c	transmembrane protein 14C		8.80742		4.41304	6.61023
chr18	Q8CBY8	NM_026302	Dctn4	dynactin subunit 4	Dctn4	dynactin subunit 4	7.06926	6.13961			6.60444
chr5	B2RVR0	NM_001042501	Fam133b	protein FAM133B	Fam133b	SubName: Full=RIKEN cDNA 5830415L20 gene;	5.53303	8.57335	5.54038		6.54892
chr6	NP_663549	NM_145574	Ccdc136	coiled-coil domain-containing protein 136 isoform 1	Ccdc136	coiled-coil domain-containing protein 136	4.60411			8.47484	6.53948
chr17	Q91WT9-2	NM_144855	Cbs	cystathionine beta-synthase isoform 1	Cbs	cystathionine beta-synthase isoform 2	7.40632		5.50331		6.45481
chr15	Q8BHS8-6	NM_178765	Sybu	syntabulin isoform c	Sybu	syntabulin isoform B	6.17444		6.62023		6.39733
chr3		n/a	n/a	n/a	Gm15417	Mus musculus adult male epididymis cDNA, RIKEN full-length enriched library, clone:9230018K07 product:hypothetical protein, full insert sequence.	6.57735		6.0765		6.32693
chr17	Q924C1-2	NM_028198	Xpo5	exportin-5	Xpo5	RecName: Full=Exportin-5; Short=Exp5; AltName: Full=Ran-binding protein 21;	7.44711		6.62388	4.90866	6.32655
chr7	Q8BMZ5-2	NM_001164205	Tsen34	tRNA-splicing endonuclease subunit Sen34 isoform b	Tsen34	tRNA-splicing endonuclease subunit Sen34 isoform		7.18697	5.46364		6.32531
chr2	Q9CV28	NM_024185	Mindy3	ubiquitin carboxyl-terminal hydrolase MINDY-3	Fam188a	2310047O13Rik protein	2.49139		10.0087		6.25005
chr15	Q99JA5	NM_001164037	Ly6e	lymphocyte antigen 6E precursor	Ly6e	lymphocyte antigen 6E	5.96099			6.48283	6.22191
chr14	NP_001074599	NM_001081130	Ogdhl	2-oxoglutarate dehydrogenase-like, mitochondrial	Ogdhl	2-oxoglutarate dehydrogenase-like,	5.88008	6.5261	8.14051	4.33938	6.22152
chr15		NM_026025	Zcrb1	zinc finger CCHC-type and RNA-binding motif-containing protein 1 isoform 1	Zcrb1	Mus musculus mRNA for MADP-1 protein, complete cds.	6.42604	5.90643			6.16624
chr1		NM_001144855	Ppfia4	liprin-alpha-4	Ppfia4	Mus musculus 18-day embryo whole body cDNA, RIKEN full-length enriched library, clone:1110008G13 product:protein tyrosine phosphatase, receptor type, f polypeptide (PTPRF), interacting protein (liprin), alpha 4, full insert sequence.	6.26428	6.05746			6.16087
chr2	Q5GMH2	NM_144893	Slc35c2	solute carrier family 35 member C2 isoform 1	Slc35c2	solute carrier family 35 member C2	3.96625		8.29405		6.13015
chr17	Q7TPD1	NM_001081034	Fbxo11	F-box only protein 11 isoform 1	Fbxo11	RecName: Full=F-box only protein 11;	4.42392	5.89087	7.88004		6.06494
chr10	NP_001153044	NM_001159572	Vsir	V-type immunoglobulin domain-containing suppressor of T-cell activation isoform 2 precursor	4632428N05Rik	platelet receptor Gi24 isoform 2 precursor		6.27742	5.97645	5.83514	6.02967
chr2	A2A483	NM_027230	Zmynd8	protein kinase C-binding protein 1 isoform 1	Zmynd8	protein kinase C-binding protein 1	5.0954		9.18704	3.79654	6.02633
chr16	Q8VD25	NR_027965	Zbtb11os1		n/a	RecName: Full=Putative uncharacterized protein LOC100009676 homolog;	7.70911	6.12525	4.18541		6.00659
chr7	Q7M6Y3-3	NM_146194	Picalm	phosphatidylinositol-binding clathrin assembly protein isoform 1	Picalm	phosphatidylinositol-binding clathrin assembly			5.79264	6.05046	5.92155
chr8	Q3UMM4	NM_194446	Cdk10	cyclin-dependent kinase 10 isoform 1	Cdk10	cell division protein kinase 10 isoform 1	6.21839	9.24035		2.19109	5.88328
chr9	Q64732	NM_022378	Foxb1	forkhead box protein B1	Foxb1	forkhead box protein B1	4.81778	6.90595			5.86186
chr1	Q6IQX7	NM_001001566	Chpf	chondroitin sulfate synthase 2 isoform a	Chpf	chondroitin sulfate synthase 2 isoform b	5.58437	7.83699		3.8852	5.76885
chr10		NM_008080	B4galnt1	beta-1,4 N-acetylgalactosaminyltransferase 1 isoform 1	B4galnt1	Mus musculus 0 day neonate thymus cDNA, RIKEN full-length enriched library, clone:A430087B14 product:UDP-N-acetyl-alpha-D-galactosamine:(N-acetylneuraminyl)- galactosylglucosylceramide-beta-1, 4-N-acetylgalactosaminyltransferase, full insert sequence.	6.03152		5.28927		5.6604
chr5	D3Z6H9	NM_198702	Adgrl3	adhesion G protein-coupled receptor L3 isoform 1 precursor	Lphn3	latrophilin-3		3.85697	5.95072	7.09393	5.63387
chr10	Q8BGJ5	NM_008956	Ptbp1	polypyrimidine tract-binding protein 1 isoform 2	Ptbp1	polypyrimidine tract-binding protein 1 isoform	6.42914			4.8236	5.62637
chr1	Q543B6	NM_133654	Cd34	hematopoietic progenitor cell antigen CD34 isoform 2 precursor	Cd34	hematopoietic progenitor cell antigen CD34		5.03645	6.17298		5.60472
chr13		NM_001114087	Pdlim7	PDZ and LIM domain protein 7 isoform b	Pdlim7	Mus musculus adult male brain cDNA, RIKEN full-length enriched library, clone:0710007K04 product:LIM MINERALIZATION PROTEIN 3 homolog [Homo sapiens], full insert sequence.		6.90452	4.29534		5.59993
chr12	Q3TQ29	NM_001160222	Pum2	pumilio homolog 2 isoform 3	Pum2	pumilio homolog 2 isoform 3	5.0852	5.77578	5.85357		5.57152
chr4	Q922X5	NM_001161774	St3gal3	CMP-N-acetylneuraminate-beta-1,4-galactoside alpha-2,3-sialyltransferase isoform a	St3gal3	CMP-N-acetylneuraminate-beta-1,4-galactoside	5.12117	4.48743		6.83973	5.48278
chr4	A2ACH4	NM_008974	Ptp4a2	protein tyrosine phosphatase type IVA 2	Ptp4a2	protein tyrosine phosphatase type IVA 2	6.43542	4.50593			5.47067
chr7	Q8R4U1	NM_145579	Mypop	myb-related transcription factor, partner of profilin	Mypop	myb-related transcription factor, partner of	9.11356		5.05248	2.16035	5.44213
chr10	Q80UP7	NM_001081412	Bcr	breakpoint cluster region protein	Bcr	SubName: Full=Bcr protein; Flags: Fragment;	5.58219		5.26183		5.42201
chr12		NM_001043336	Eml1	echinoderm microtubule-associated protein-like 1 isoform 2	Eml1	Mus musculus 18-day embryo whole body cDNA, RIKEN full-length enriched library, clone:1110008N23 product:unclassifiable, full insert sequence.	6.59582	4.21526			5.40554
chr7	Q0VG22	NM_019990	Stard10	START domain-containing protein 10	Stard10	SubName: Full=START domain containing 10; SubName: Full=START domain containing 10, isoform CRA_d;		6.59406		4.15391	5.37398
chr15	NP_001157014	NM_001163542	Plec	plectin isoform 1c2alpha3alpha	Plec	plectin isoform 1c2alpha3alpha	2.68081		3.48429	9.84449	5.33653
chr9	P54823	NM_001110826	Ddx6	probable ATP-dependent RNA helicase DDX6	Ddx6	probable ATP-dependent RNA helicase DDX6	2.30816	8.30691			5.30753
chr4	Q9CY05	NM_020000	Med8	mediator of RNA polymerase II transcription subunit 8 isoform 1	Med8	SubName: Full=Mediator of RNA polymerase II transcription, subunit 8 homolog (Yeast); SubName: Full=Mediator of RNA polymerase II transcription, subunit 8 homolog (Yeast), isoform CRA_d; SubName: Full=Putative uncharacterized protein;		6.96291	5.54372	3.2962	5.26761
chr14	Q9JHK4	NM_019519	Rabggta	geranylgeranyl transferase type-2 subunit alpha	Rabggta	geranylgeranyl transferase type-2 subunit alpha		4.54046	5.97724		5.25885
chr9	Q9DCB4-2	NM_001177615	Arpp21	cAMP-regulated phosphoprotein 21 isoform 1	Arpp21	cAMP-regulated phosphoprotein 21 isoform 1	4.64302		6.08182	4.97443	5.23309
chr3	NP_001185842	NM_001198913	Arhgef2	rho guanine nucleotide exchange factor 2 isoform 4	Arhgef2	rho guanine nucleotide exchange factor 2 isoform	6.22501			4.18704	5.20603
chr17	Q8CFZ0	NM_001177609	Ube2i	SUMO-conjugating enzyme UBC9	Ube2i	SUMO-conjugating enzyme UBC9		5.32389	5.0512		5.18755
chr17	B0V2H6	NM_001198833	Ddr1	epithelial discoidin domain-containing receptor 1 isoform 1 precursor	Ddr1	epithelial discoidin domain-containing receptor	6.66978			3.69298	5.18138
chr4	Q9QZN4	NM_001163705	Fbxo6	F-box only protein 6	Fbxo6	F-box only protein 6	4.55198	5.77424			5.16311
chr7		NM_021336	Snrpa1	U2 small nuclear ribonucleoprotein A'	Snrpa1	Mus musculus U2 small nuclear ribonucleoprotein A' mRNA, complete cds.		5.73389	4.56059		5.14724
chr8		NM_001039965	Zfp869	zinc finger protein 869	Zfp869	Mus musculus adult male lung cDNA, RIKEN full-length enriched library, clone:1200003I07 product:similar to MSZF62 (FRAGMENT) [Mus musculus], full insert sequence.	3.1977	7.06282			5.13026
chr7	Q3USC3	NM_029391	Rab4b	ras-related protein Rab-4B	Rab4b	ras-related protein Rab-4B		4.30928	5.94295		5.12612
chrX	Q8C690	NM_001033422	Thoc2	THO complex subunit 2	Thoc2	SubName: Full=Putative uncharacterized protein; SubName: Full=THO complex 2; Flags: Fragment;	7.01155		5.12084	3.21348	5.11529
chr4	Q6NXN1-2	NM_174996	n/a	n/a	D4Ertd22e	putative MAPK activating protein PM20,PM21	2.05199	5.7719	2.70791	9.87833	5.10253
chr1	Q3UTC9	NM_008575	Mdm4	protein Mdm4 isoform 2	Mdm4	protein Mdm4	4.00874		6.17447		5.09161
chr5	NP_766579	NM_172991	Rbm48	RNA-binding protein 48	C030048B08Rik	hypothetical protein LOC269623	5.06252		5.10098		5.08175
chr8	Q3UQ76	NM_023395	Wfdc1	WAP four-disulfide core domain protein 1 precursor	Wfdc1	WAP four-disulfide core domain protein 1		4.71193	5.41534		5.06363
chr15		NM_018790	Arc	activity-regulated cytoskeleton-associated protein	Arc	activity-regulated cytoskeleton-associated	4.94983	4.79165	5.43859		5.06002
chr7	Q6PKB0	NM_010189	Fcgrt	IgG receptor FcRn large subunit p51 precursor	Fcgrt	IgG receptor FcRn large subunit p51 precursor		3.60425	6.3051	4.99786	4.96907
chr13	NP_001139517	NM_001146045	Fam169a	soluble lamin-associated protein of 75 kDa	Fam169a	hypothetical protein LOC320557	6.79784	2.48119	5.61591		4.96498
chr2	Q8VCI8	NM_019822	Adrm1	proteasomal ubiquitin receptor ADRM1	Adrm1	SubName: Full=Adrm1 protein;			6.21733	3.68906	4.9532
chr7	P54830-2	NM_001163565	Ptpn5	tyrosine-protein phosphatase non-receptor type 5	Ptpn5	RecName: Full=Tyrosine-protein phosphatase non-receptor type 5; EC=3.1.3.48; AltName: Full=Neural-specific protein-tyrosine phosphatase; AltName: Full=Striatum-enriched protein-tyrosine phosphatase; Short=STEP;			4.42969	5.39065	4.91017
chr2	Q3UJ34	NM_007494	Ass1	argininosuccinate synthase	Ass1	argininosuccinate synthase	7.27415		2.52994		4.90204
chr14		n/a	n/a	n/a	Gm16867	Mus musculus adult male testis cDNA, RIKEN full-length enriched library, clone:4930513O14 product:mitochondrial solute carrier protein, full insert sequence.	5.08013			4.70696	4.89354
chr3	Q8CIN6	NM_172434	Celf3	CUGBP Elav-like family member 3 isoform 2	Celf3	CUGBP Elav-like family member 3			5.33438	4.45031	4.89235
chrX	B1AU27	NM_001166648	Zfp280c	zinc finger protein 280C isoform 1	Zfp280c	zinc finger protein 280C isoform 1		5.70047	4.37224	4.5438	4.87217
chr3	Q3TNN4	NM_001145877	Slc25a44	solute carrier family 25 member 44 isoform c	Slc25a44	solute carrier family 25 member 44 isoform c	3.92875		7.57732	3.08601	4.86403
chr18	Q52KF3	NM_194355	Spire1	protein spire homolog 1 isoform 1	Spire1	protein spire homolog 1 isoform 2		5.49841	4.19161		4.84501
chr5	NP_663333	NM_145358	Camkk2	calcium/calmodulin-dependent protein kinase kinase 2 isoform 2	Camkk2	calcium/calmodulin-dependent protein kinase		6.48061	3.19502		4.83781
chr7	Q8BXM6	NM_144925	Tnrc6a	trinucleotide repeat-containing gene 6A protein	Tnrc6a	trinucleotide repeat-containing gene 6A protein			6.30234	3.32798	4.81516
chr12	NP_001153686	NM_001160214	Ppp4r3a	serine/threonine-protein phosphatase 4 regulatory subunit 3A isoform 2	Smek1	serine/threonine-protein phosphatase 4			3.63975	5.94406	4.7919
chr17	Q8K2X8	NM_181392	Gtf2h5	general transcription factor IIH subunit 5	Gtf2h5	general transcription factor IIH subunit 5	5.25327		4.32839		4.79083
chr10	Q8BH60-2	NM_053187	Gopc	Golgi-associated PDZ and coiled-coil motif-containing protein isoform b	Gopc	Golgi-associated PDZ and coiled-coil	2.46051		9.69932	2.18141	4.78041
chr4	A2ASQ1-3	NM_021604	Agrn	agrin precursor	Agrn	RecName: Full=Agrin; Flags: Precursor;	3.61784		4.91796	5.79842	4.77807
chr11	Q08481	NM_008816	Pecam1	platelet endothelial cell adhesion molecule isoform 1 precursor	Pecam1	platelet endothelial cell adhesion molecule		5.67711	3.84613		4.76162
chr1	Q6AXH6	NM_001198571	Abi2	abl interactor 2 isoform 2	Abi2	abl interactor 2 isoform 2	6.27574	3.20717	3.07215	6.455	4.75252
chr14	Q9DCL1	NM_001037938	Dhrs4	dehydrogenase/reductase SDR family member 4 isoform 1	Dhrs4	dehydrogenase/reductase SDR family member 4		4.38311	5.12187		4.75249
chr10	Q05A21	NM_001190474	Dapk3	death-associated protein kinase 3 isoform a	Dapk3	death-associated protein kinase 3			2.98931	6.45747	4.72339
chr12	Q149E9	NM_175335	Gtf2a1	transcription initiation factor IIA subunit 1 isoform 2	Gtf2a1	transcription initiation factor IIA subunit 1			6.98154	2.44356	4.71255
chr1	NP_032722	NM_008696	Map4k4	mitogen-activated protein kinase kinase kinase kinase 4 isoform 2	Map4k4	mitogen-activated protein kinase kinase kinase		4.12976	6.61312	3.38818	4.71035
chr1	NP_080730	NM_026454	Ube2f	NEDD8-conjugating enzyme UBE2F	Ube2f	NEDD8-conjugating enzyme UBE2F		6.54188	2.87658		4.70923
chr3	NP_001034465	NM_001039376	Pde4dip	myomegalin isoform 1	Pde4dip	myomegalin isoform 1		4.89544		4.43513	4.66528
chr1	Q3UTC9	NM_008575	Mdm4	protein Mdm4 isoform 2	Mdm4	protein Mdm4	2.5938	6.71895			4.65638
chr2	NP_081710	NM_027434	Rprd1b	regulation of nuclear pre-mRNA domain-containing protein 1B isoform b	Rprd1b	regulation of nuclear pre-mRNA domain-containing			5.85185	3.45109	4.65147
chr19	Q3U9D6	NM_175353	Exoc6	exocyst complex component 6	Exoc6	exocyst complex component 6	4.56951	4.69064			4.63007
chr4	Q3TCP7	NM_138671	Nadk	NAD kinase	Nadk	NAD kinase	6.82821		2.41028		4.61925
chr16		NM_138583	Tango2	transport and Golgi organization 2 homolog	D16H22S680E	Mus musculus NOD-derived CD11c +ve dendritic cells cDNA, RIKEN full-length enriched library, clone:F630101K16 product:SER/THR-RICH PROTEIN T10 IN DGCR REGION, full insert sequence.	3.91956			5.28567	4.60262
chr12	Q8BGQ1-2	NM_001142581	Vipas39	spermatogenesis-defective protein 39 homolog isoform b	Vipar	VPS33B-interacting protein isoform b	3.99042	5.2131			4.60176
chr4	A2ALQ7	NM_175201	Rnf38	E3 ubiquitin-protein ligase RNF38 isoform 1	Rnf38	RING finger protein 38 isoform 1		2.40009		6.66692	4.5335
chrX	Q05AF0	NM_138607	Fam50a	protein FAM50A	Fam50a	SubName: Full=Fam50a protein;	2.67108		3.18126	7.61935	4.49056
chr14	Q3TT33	NM_001110794	Anxa7	annexin A7	Anxa7	annexin A7		4.43912	4.52557		4.48235
chr15	Q8R435	NM_008427	Kcnj4	inward rectifier potassium channel 4	Kcnj4	inward rectifier potassium channel 4	6.59994		2.35333		4.47663
chr6	NP_694803	NM_153163	Cadps2	calcium-dependent secretion activator 2 isoform 1	Cadps2	calcium-dependent secretion activator 2	4.97885		5.26598	3.17787	4.47423
chr15	Q3UT02	NM_001024526	Larp4	la-related protein 4 isoform 1	Larp4	la-related protein 4 isoform 2	4.67269	5.31949		3.41123	4.4678
chrX	A2AFQ0	NM_021523	Huwe1	E3 ubiquitin-protein ligase HUWE1	Huwe1	E3 ubiquitin-protein ligase HUWE1	4.04137	4.14096		5.21435	4.46556
chr8	Q3UYK3-2	NM_027758	Tbc1d9	TBC1 domain family member 9 isoform 2	Tbc1d9	TBC1 domain family member 9 isoform 2	4.25262		4.64602		4.44932
chr12	B8JK56	NM_001159536	Adcy3	adenylate cyclase type 3 isoform 2	Adcy3	adenylate cyclase type 3 isoform 2	3.97655		4.91435		4.44545
chr14	Q3UKQ7	NM_008394	Irf9	interferon regulatory factor 9 isoform 3	Irf9	interferon regulatory factor 9 isoform 3		5.50001	3.32715		4.41358
chr9	Q8C766	NM_001042752	Neo1	neogenin isoform 2 precursor	Neo1	SubName: Full=Putative uncharacterized protein;	4.79501		4.02172		4.40836
chr13	Q3UHJ8-3	NR_027395	Rnf44		Rnf44	RING finger protein 44 isoform 3	5.00212	3.80217			4.40214
chr7	Q8K1A5	NM_153525	Tmem41b	transmembrane protein 41B	Tmem41b	transmembrane protein 41B		6.32403	2.47708		4.40055
chr17	Q3UUG6	NM_001163847	Tbc1d24	TBC1 domain family member 24 isoform a	Tbc1d24	TBC1 domain family member 24 isoform a	4.65347			4.12183	4.38765
chr8	Q9ES28-8	NM_001113518	Arhgef7	rho guanine nucleotide exchange factor 7 isoform b	Arhgef7	rho guanine nucleotide exchange factor 7 isoform		3.05557	5.66116		4.35837
chr7	Q58E38	NM_001172561	Sphk2	sphingosine kinase 2	Sphk2	sphingosine kinase 2		3.98171		4.72702	4.35437
chr5	Q9JLK7	NM_013879	Cabp1	calcium-binding protein 1 isoform 2	Cabp1	calcium-binding protein 1		4.44466		4.25996	4.35231
chr7	Q9CZI9	NM_026531	Aen	apoptosis-enhancing nuclease isoform 1	Aen	apoptosis-enhancing nuclease isoform 1	3.03373	5.62718			4.33045
chr17	B8JK33	NM_001109913	Hnrnpm	heterogeneous nuclear ribonucleoprotein M isoform b	Hnrnpm	SubName: Full=Heterogeneous nuclear ribonucleoprotein M;			5.17919	3.45343	4.31631
chr15	NP_079721	NM_025445	Arfgap3	ADP-ribosylation factor GTPase-activating protein 3	Arfgap3	ADP-ribosylation factor GTPase-activating	2.92809		4.77178	5.21255	4.30414
chr11	Q8R1N9	NM_016910	Ppm1d	protein phosphatase 1D	Ppm1d	protein phosphatase 1D		4.95509		3.632	4.29354
chr14	Q8BPS4	NM_021434	Gpr180	integral membrane protein GPR180 precursor	Gpr180	RecName: Full=Integral membrane protein GPR180; Flags: Precursor;	3.21999		6.09711	3.48278	4.26663
chr1	Q8K158	NM_026977	Cnppd1	protein CNPPD1	1810031K17Rik	hypothetical protein LOC69171	3.29209	5.23524			4.26366
chr1	Q59IX1	NM_008765	Orc2	origin recognition complex subunit 2 isoform A	Orc2	origin recognition complex subunit 2 isoform B			3.89149	4.616	4.25375
chr15	NP_001157061	NM_001163589	Prph	peripherin isoform 3	Prph	peripherin isoform 3	3.84374	4.6517			4.24772
chr2	Q91UZ1	NM_013829	Plcb4	1-phosphatidylinositol 4,5-bisphosphate phosphodiesterase beta-4	Plcb4	SubName: Full=Phospholipase C beta 4; SubName: Full=Phospholipase C, beta 4; SubName: Full=Plcb4;	4.49195		4.28992	3.92921	4.23703
chr10	NP_080846	NM_026570	Yeats4	YEATS domain-containing protein 4	Yeats4	YEATS domain-containing protein 4	3.63025		4.88568	4.18085	4.23226
chr14	NP_001177116	NM_001190187	Nrg3	pro-neuregulin-3, membrane-bound isoform isoform 2	Nrg3	pro-neuregulin-3, membrane-bound isoform isoform		5.98254		2.46353	4.22304
chr4	Q8BJQ2	NM_146144	Usp1	ubiquitin carboxyl-terminal hydrolase 1	Usp1	ubiquitin carboxyl-terminal hydrolase 1		5.31323	4.12921	3.18682	4.20975
chr15		NM_027707	Nipbl	nipped-B-like protein isoform a	Nipbl	Mus musculus 12 days embryo embryonic body between diaphragm region and neck cDNA, RIKEN full-length enriched library, clone:9430001O08 product:inferred: IDN3 {Homo sapiens}, full insert sequence.	4.83157		4.69279	3.02538	4.18325
chr1	Q3ZAQ4	NM_001003917	Atg9a	autophagy-related protein 9A isoform a	Atg9a	autophagy-related protein 9A		3.78271	4.57438		4.17854
chr15		NM_001163319	Tubgcp6	gamma-tubulin complex component 6	Tubgcp6	Mus musculus 13 days embryo heart cDNA, RIKEN full-length enriched library, clone:D330022G06 product:similar to DJ402G11.6 (NOVEL PROTEIN SIMILAR TO XENOPUS GAMMA-TUBULIN INTERACTING PROTEIN (YEAST SPC98 HOMOLOG) (ISOFORM 1)) (FRAGMENT) [Homo sapiens], full insert sequence.	4.69618		3.64941		4.17279
chr6	Q8CFA1-4	NM_172161	Irak2	interleukin-1 receptor-associated kinase-like 2 isoform a	Irak2	RecName: Full=Interleukin-1 receptor-associated kinase-like 2; Short=IRAK-2; Short=mu-IRAK-2;		5.94397	2.39388		4.16892
chr5	Q9WVQ1-2	NM_015823	Magi2	membrane-associated guanylate kinase, WW and PDZ domain-containing protein 2 isoform 2	Magi2	membrane-associated guanylate kinase, WW and PDZ	5.09208	3.21044			4.15126
chr6	NP_001153006	NM_001159534	Cacna1c	voltage-dependent L-type calcium channel subunit alpha-1C isoform 3	Cacna1c	voltage-dependent L-type calcium channel subunit			2.17396	6.11782	4.14589
chr2	A2BH81	NM_009261	Strbp	spermatid perinuclear RNA-binding protein	Strbp	spermatid perinuclear RNA-binding protein		3.26014		5.02348	4.14181
chr2	A2AGL5	NM_001165935	Aven	cell death regulator Aven isoform 2	Aven	cell death regulator Aven isoform 2		3.2067		5.07268	4.13969
chr11	Q9JMH9-7	NM_011586	Myo18a	unconventional myosin-XVIIIa isoform 2	Myo18a	myosin-XVIIIa	3.27911		4.99078		4.13495
chr2	A2AFW6	NM_019758	Mtch2	mitochondrial carrier homolog 2 isoform 1	Mtch2	SubName: Full=Mitochondrial carrier homolog 2 (C. elegans);	4.27379		3.95728		4.11553
chr8	Q6ZQ08-2	NM_178078	Cnot1	CCR4-NOT transcription complex subunit 1 isoform 2	Cnot1	CCR4-NOT transcription complex subunit 1 isoform	5.35976	2.8609			4.11033
chrX	Q8BIF0-2	NM_138309	Cd99l2	CD99 antigen-like protein 2 isoform 2 precursor	Cd99l2	CD99 antigen-like protein 2 isoform 2	4.95875		3.25948		4.10912
chr2	A2AK40	NM_011774	Slc30a4	zinc transporter 4 isoform a	Slc30a4	zinc transporter 4		2.21959	5.98718		4.10339
chr18	Q8BGU2	NM_172633	Cbln2	cerebellin-2 precursor	Cbln2	cerebellin-2		2.13031	3.65258	6.512	4.0983
chr3	B2RRZ4	NM_007560	Bmpr1b	bone morphogenetic protein receptor type-1B isoform a precursor	Bmpr1b	bone morphogenetic protein receptor type-1B	3.85903	4.75041	3.6587		4.08938
chr17	Q80TT8-2	NM_001081335	Cul9	cullin-9	Cul9	cullin-9	4.7486		3.42523		4.08691
chr18	B2RUJ8	NM_029277	Arhgap12	rho GTPase-activating protein 12 isoform 2	Arhgap12	rho GTPase-activating protein 12 isoform 2		4.12446	4.04915		4.08681
chr18	D3YV00	NM_015805	Atp9b	probable phospholipid-transporting ATPase IIB isoform 2	Atp9b	probable phospholipid-transporting ATPase IIB	2.97644	5.16302			4.06973
chr12	P97358-2	NR_028341	Taf1b		Taf1b	RecName: Full=TATA box-binding protein-associated factor RNA polymerase I subunit B; AltName: Full=RNA polymerase I-specific TBP-associated factor 68 kDa; Short=TAFI68; AltName: Full=TATA box-binding protein-associated factor 1B; Short=TBP-associated factor 1B; AltName: Full=Transcription initiation factor SL1/TIF-IB subunit B;		3.72016		4.38872	4.05444
chr14	Q8BTL0	NM_027764	Rcbtb1	RCC1 and BTB domain-containing protein 1	Rcbtb1	RCC1 and BTB domain-containing protein 1		3.96571	4.12593		4.04582
chr9	NP_034196	NM_010066	Dnmt1	DNA (cytosine-5)-methyltransferase 1 isoform 2	Dnmt1	DNA (cytosine-5)-methyltransferase 1 isoform 2	2.92895	5.16014			4.04455
chr8	D3Z4C7	NM_025518	Dus2	tRNA-dihydrouridine(20) synthase [NAD(P)+]-like isoform 1	Dus2l	SubName: Full=MCG20459, isoform CRA_a; SubName: Full=Putative uncharacterized protein Dus2l;	6.04942		2.00108		4.02525
chr1	Q69ZP1	NM_153774	Ipo9	importin-9	Ipo9	SubName: Full=MKIAA1192 protein; Flags: Fragment;			4.13697	3.88357	4.01027
chr5	B2LVG5	NM_178576	Cpsf4	cleavage and polyadenylation specificity factor subunit 4 isoform c	Cpsf4	cleavage and polyadenylation specificity factor	4.30808	3.56735		4.13462	4.00335
chr8	Q8K327	NM_181854	Champ1	chromosome alignment-maintaining phosphoprotein 1	Zfp828	zinc finger protein 828	3.6366	4.36135			3.99897
chr13	Q3UNH4	NM_012014	Gprin1	G protein-regulated inducer of neurite outgrowth 1	Gprin1	G protein-regulated inducer of neurite outgrowth	3.2402	4.72352			3.98186
chr11	Q542U4	NM_019819	Dusp14	dual specificity protein phosphatase 14	Dusp14	dual specificity protein phosphatase 14	3.66095		4.29226		3.97661
chr5	Q9JI57-6	NM_001081463	Gtf2ird1	general transcription factor II-I repeat domain-containing protein 1 isoform c	Gtf2ird1	general transcription factor II-I repeat	3.0709			4.88069	3.9758
chr2	A2AU66	NM_001141982	Rbm43	RNA-binding protein 43	Rbm43	RNA-binding protein 43		4.1324	3.81906		3.97573
chr8	Q3TZM9	NM_183142	Alg11	GDP-Man:Man(3)GlcNAc(2)-PP-Dol alpha-1,2-mannosyltransferase isoform 2	Alg11	asparagine-linked glycosylation protein 11	4.23877	4.729	4.00301	2.92025	3.97276
chr10	B9EKJ3	NM_001163025	Mon2	protein MON2 homolog isoform 2	Mon2	protein MON2 homolog isoform 2	5.09291		3.33275	3.47968	3.96845
chr11	A1L352	NM_011268	Rgs9	regulator of G-protein signaling 9 isoform 1	Rgs9	regulator of G-protein signaling 9 isoform 1	3.47256		4.44599		3.95927
chr2	Q3TVC7-2	NM_010761	Ccndbp1	cyclin-D1-binding protein 1	Ccndbp1	cyclin-D1-binding protein 1	3.11782	4.78266			3.95024
chr5	D3YXR8	NM_001081388	Rimbp2	RIMS-binding protein 2 isoform 1	Rimbp2	RIMS-binding protein 2		3.71695		4.13483	3.92589
chr6		NR_027008	Gt(ROSA)26Sor		Gt(ROSA)26Sor	Mus musculus gene trap ROSA 26, Philippe Soriano (Gt(ROSA)26Sor), transcript variant 1, non-coding RNA.			5.38581	2.4599	3.92286
chr13	O09113	NM_011021	Otp	homeobox protein orthopedia	Otp	homeobox protein orthopedia	3.88229	3.95199			3.91714
chr4	A0ZV96	NM_172701	Oscp1	protein OSCP1	Oscp1	protein OSCP1	4.16462	4.19311	4.11218	3.16595	3.90897
chr5	Q9D1H7-2	NM_001163316	Get4	Golgi to ER traffic protein 4 homolog isoform 2	Get4	Golgi to ER traffic protein 4 homolog isoform 2	3.78968		4.02586		3.90777
chr9		NM_001162917	Dennd4a	C-myc promoter-binding protein	Dennd4a	Mus musculus 10 days neonate cerebellum cDNA, RIKEN full-length enriched library, clone:6530403F14 product:inferred: transcription factor irlB {Homo sapiens}, full insert sequence.	2.86413		5.81193	3.04188	3.90598
chr8	NP_001164446	NM_001170975	Dbndd1	dysbindin domain-containing protein 1 isoform 2	Dbndd1	dysbindin domain-containing protein 1 isoform 2		2.0032		5.78746	3.89533
chr9	Q6P3A8-2	NM_199195	Bckdhb	2-oxoisovalerate dehydrogenase subunit beta, mitochondrial isoform 2	Bckdhb	2-oxoisovalerate dehydrogenase subunit beta,		4.27196	2.94922	4.46127	3.89415
chr12		NM_026998	Snx6	sorting nexin-6	Snx6	Mus musculus adult male small intestine cDNA, RIKEN full-length enriched library, clone:2010006G21 product:weakly similar to SORTING NEXIN 5 [Homo sapiens], full insert sequence.			4.03858	3.74161	3.89009
chr1	Q8BJL0-2	NM_018817	Smarcal1	SWI/SNF-related matrix-associated actin-dependent regulator of chromatin subfamily A-like protein 1	Smarcal1	SWI/SNF-related matrix-associated		4.99362		2.77774	3.88568
chr1	B7ZWE2	NM_001033185	Ccdc190	coiled-coil domain-containing protein 190 isoform 1	1700084C01Rik	hypothetical protein LOC78465			4.56063	3.18838	3.87451
chr2	Q4VA59	NM_178607	Rnf24	RING finger protein 24	Rnf24	RING finger protein 24	3.38536			4.36248	3.87392
chr2	B1AWV9	NM_033552	Slc4a10	sodium-driven chloride bicarbonate exchanger isoform 2	Slc4a10	sodium-driven chloride bicarbonate exchanger	4.98542	3.23858	3.35518		3.85973
chr1	Q03173-3	NM_001083121	Enah	protein enabled homolog isoform 4	Enah	protein enabled homolog isoform 4		4.65093	3.05421		3.85257
chr9	Q3UZR5	NM_175025	Atp2c1	calcium-transporting ATPase type 2C member 1 isoform 2	Atp2c1	calcium-transporting ATPase type 2C member 1	5.26215			2.4281	3.84513
chr2	Q99KN1-2	NM_178408	Arrdc1	arrestin domain-containing protein 1 isoform b	Arrdc1	arrestin domain-containing protein 1 isoform b		3.97487		3.68474	3.82981
chr12	B2RY56-3	NM_027349	Rbm25	RNA-binding protein 25	Rbm25	RNA-binding protein 25	3.234	4.4161			3.82505
chr5	Q9DBR4-3	NM_001201415	Apbb2	amyloid beta A4 precursor protein-binding family B member 2 isoform 4	Apbb2	amyloid beta A4 precursor protein-binding family	2.15818	6.11341		3.17094	3.81418
chr15	Q8C561-2	NM_177178	Lmbrd2	LMBR1 domain-containing protein 2	Lmbrd2	LMBR1 domain-containing protein 2	2.94501	4.67947			3.81224
chr14	Q3TSL8	NM_010610	Kcnma1	calcium-activated potassium channel subunit alpha-1 isoform 8	Kcnma1	calcium-activated potassium channel subunit	4.10134	3.52286			3.8121
chr5	Q3UYH7	NM_177078	Grk3	beta-adrenergic receptor kinase 2 isoform 1	Adrbk2	beta-adrenergic receptor kinase 2 isoform 1	2.60207		5.00893		3.8055
chr4	Q64729-2	NM_009370	Tgfbr1	TGF-beta receptor type-1 isoform 1 precursor	Tgfbr1	TGF-beta receptor type-1		4.65773		2.93855	3.79814
chr10	Q80X44	NM_153398	Zbtb24	zinc finger and BTB domain-containing protein 24 isoform 1	Zbtb24	zinc finger and BTB domain-containing protein	3.25152	5.46347	2.67179		3.79559
chr11	Q8BSN5	NM_030064	Phf23	PHD finger protein 23 isoform a	Phf23	PHD finger protein 23	4.99288		2.59291		3.7929
chr15		NM_001044741	Cacnb3	voltage-dependent L-type calcium channel subunit beta-3 isoform 2	Cacnb3	Mus musculus strain ILS calcium channel beta 3 subunit mRNA, complete cds.	4.24596		3.33559		3.79078
chr2	Q8BS25	NM_001164769	Fbxw2	F-box/WD repeat-containing protein 2 isoform 2	Fbxw2	F-box/WD repeat-containing protein 2 isoform 2		4.41161	3.16615		3.78888
chr11	Q5SV77-4	NM_153144	Ggnbp2	gametogenetin-binding protein 2	Ggnbp2	gametogenetin-binding protein 2	4.1502	3.40159			3.7759
chr7	D3Z4D5	NM_028095	Eef1akmt2	EEF1A lysine methyltransferase 2 isoform 1	Mettl10	SubName: Full=Putative uncharacterized protein Mettl10;			3.42949	4.11523	3.77236
chr13	Q3TFD2-3	NM_145376	Lpcat1	lysophosphatidylcholine acyltransferase 1	Lpcat1	RecName: Full=Lysophosphatidylcholine acyltransferase 1; Short=LPC acyltransferase 1; Short=LPCAT-1; Short=LysoPC acyltransferase 1; Short=mLPCAT1; EC=2.3.1.-; AltName: Full=1-acylglycerophosphocholine O-acyltransferase; EC=2.3.1.23; AltName: Full=1-alkylglycerophosphocholine O-acetyltransferase; EC=2.3.1.67; AltName: Full=Acetyl-CoA:lyso-platelet-activating factor acetyltransferase; Short=Acetyl…	2.39065	5.30015	5.30756	2.09051	3.77222
chr14	Q91WK9	NM_026322	Msra	mitochondrial peptide methionine sulfoxide reductase isoform 1	Msra	SubName: Full=Msra protein;		5.21101		2.32941	3.77021
chr11	Q9CQY7	NM_026178	Mmd	monocyte to macrophage differentiation factor	Mmd	monocyte to macrophage differentiation protein		4.13764	3.38608		3.76186
chr2	Q8C0L9	NM_001042671	n/a	n/a	Gpcpd1	putative glycerophosphocholine phosphodiesterase	4.56793	2.95183			3.75988
chrX		NM_029951	C330007P06Rik	UPF0428 protein CXorf56 homolog	C330007P06Rik	Mus musculus ES cells cDNA, RIKEN full-length enriched library, clone:C330007P06 product:hypothetical protein, full insert sequence.	4.3248	4.33058		2.6039	3.75309
chr3		NM_010269	Gdap2	ganglioside-induced differentiation-associated protein 2	Gdap2	Mus musculus adult male liver cDNA, RIKEN full-length enriched library, clone:1300003N14 product:ganglioside-induced differentiation-associated-protein 2, full insert sequence.	3.78865	3.69565			3.74215
chr17	Q544H8	NM_009547	Zbtb14	zinc finger and BTB domain-containing protein 14	Zfp161	zinc finger protein 161	3.72047		3.76236		3.74141
chr2	O35852	NM_018863	Pdyn	proenkephalin-B preproprotein	Pdyn	proenkephalin-B preproprotein	5.26393		2.21492		3.73943
chr9	Q5DU01	NM_023858	Mtmr2	myotubularin-related protein 2	Mtmr2	myotubularin-related protein 2	2.57582		4.8749		3.72536
chr5	Q9D2V8	NM_026660	Mfsd10	major facilitator superfamily domain-containing protein 10	Mfsd10	major facilitator superfamily domain-containing	2.16801	4.0824		4.91632	3.72224
chr11	NP_001156350	NM_001162878	Fam183b	protein FAM183B isoform 2	Fam183b	hypothetical protein LOC75429 isoform 2	2.87804	4.56042			3.71923
chr2	Q3UHX9-2	NM_172660	Spout1	putative methyltransferase C9orf114 homolog	D2Wsu81e	hypothetical protein LOC227695	4.0341	4.86218	2.05298	3.86789	3.70429
chr13	A6XDA7	NM_011056	Pde4d	cAMP-specific 3',5'-cyclic phosphodiesterase 4D	Pde4d	cAMP-specific 3',5'-cyclic phosphodiesterase 4D	2.82997	5.52708	3.86555	2.59189	3.70362
chr2	Q9D3D0	NM_029512	Ttpal	alpha-tocopherol transfer protein-like isoform 1	Ttpal	alpha-tocopherol transfer protein-like		4.24165		3.16497	3.70331
chr10	NP_001033744	NM_001038655	Gng7	guanine nucleotide-binding protein G(I)/G(S)/G(O) subunit gamma-7	Gng7	guanine nucleotide-binding protein	4.23571	5.61567	2.09139	2.80246	3.68631
chr13	NP_031822	NM_007796	Ctla2a	protein CTLA-2-alpha isoform a precursor	Ctla2a	protein CTLA-2-alpha isoform a		4.49874	2.86931		3.68403
chr1		NM_011206	Ptpn18	tyrosine-protein phosphatase non-receptor type 18	Ptpn18	Mus musculus 13 days embryo head cDNA, RIKEN full-length enriched library, clone:3110012D23 product:protein tyrosine phosphatase, non-receptor type 18, full insert sequence.		4.97323	2.39301		3.68312
chr6	A4PI82	NM_153163	Cadps2	calcium-dependent secretion activator 2 isoform 1	Cadps2	calcium-dependent secretion activator 2	2.55781	4.79935			3.67858
chr6	NP_082224	NM_027948	1700003E16Rik	uncharacterized protein C2orf81 homolog	1700003E16Rik	hypothetical protein LOC71837	4.62104			2.71608	3.66856
chr15	Q80V03-2	NM_172960	Adck5	uncharacterized aarF domain-containing protein kinase 5	Adck5	RecName: Full=Uncharacterized aarF domain-containing protein kinase 5; EC=2.7.11.-;	3.70423			3.62514	3.66468
chr1		NR_002840	Gas5		Gas5	Mus musculus 9 days embryo whole body cDNA, RIKEN full-length enriched library, clone:D030018K05 product:growth arrest specific 5, full insert sequence.		3.40169	3.90919		3.65544
chr10	Q6PAV2	NM_030114	Herc4	probable E3 ubiquitin-protein ligase HERC4 isoform 1	Herc4	probable E3 ubiquitin-protein ligase HERC4	4.3736	3.5088		3.08375	3.65538
chr17	Q5RKZ7	NM_020042	Mocs1	molybdenum cofactor biosynthesis protein 1 isoform 1	Mocs1	molybdenum cofactor biosynthesis protein 1	2.98943	4.31699			3.65321
chr14	Q8VCB6	NM_027726	Dlg5	disks large homolog 5 isoform 2	Dlg5	SubName: Full=Dlg5 protein;	4.23275		3.07164		3.65219
chrX	NP_001108136	NM_001114664	Iqsec2	IQ motif and SEC7 domain-containing protein 2 isoform 1	Iqsec2	IQ motif and SEC7 domain-containing protein 2	4.76258		2.52025		3.64141
chr9	Q3UFS9	NM_026942	Stoml1	stomatin-like protein 1	Stoml1	stomatin-like protein 1	3.329		4.75126	2.83598	3.63875
chr6	D3Z5R4	NM_001167861	Wipf3	WAS/WASL-interacting protein family member 3 isoform b	Wipf3	WAS/WASL-interacting protein family member 3		3.20676		4.06188	3.63432
chr9	Q8BH79-2	NM_133979	Ano10	anoctamin-10 isoform 1	Ano10	anoctamin-10	3.12655		4.58028	3.18018	3.629
chr18	Q3V3E0	NM_010754	Smad2	mothers against decapentaplegic homolog 2 isoform 1	Smad2	mothers against decapentaplegic homolog 2	3.75983	4.89053		2.23586	3.62874
chr13	Q3UVQ0	NM_029210	Sv2c	synaptic vesicle glycoprotein 2C	Sv2c	synaptic vesicle glycoprotein 2C		4.33001		2.92496	3.62749
chr5	Q6PG00	NM_018825	Sh2b2	SH2B adapter protein 2 isoform 1	Sh2b2	SH2B adapter protein 2			5.20878	2.03658	3.62268
chr10	P62340	NM_011603	Tbpl1	TATA box-binding protein-like protein 1	Tbpl1	TATA box-binding protein-like protein 1	2.91632		4.32071		3.61851
chr8	B9EHV1	NM_001142323	Myo9b	unconventional myosin-IXb isoform 2	Myo9b	myosin-IXb isoform 2		2.59331		4.6436	3.61845
chr7	Q8C393	NM_011769	Zim1	zinc finger, imprinted 1	Zim1	zinc finger, imprinted 1	3.6594	3.5575			3.60845
chr5	Q922J3	NM_019765	Clip1	CAP-Gly domain-containing linker protein 1 isoform a	Clip1	CAP-Gly domain-containing linker protein 1	4.00489		3.20303		3.60396
chr2	Q2TK26	NM_019488	Slc2a8	solute carrier family 2, facilitated glucose transporter member 8	Slc2a8	SubName: Full=Intestinal GLUT8 transporter MSP2;		4.00446	4.01617	2.77847	3.5997
chr9	Q4VA36-3	NM_201372	Ccdc84	coiled-coil domain-containing protein 84	Ccdc84	RecName: Full=Coiled-coil domain-containing protein 84;		3.66069	3.50952		3.58511
chr5	Q8BH49	NM_175474	Fam109a	sesquipedalian-1	Fam109a	family with sequence similarity 109, member A	2.63528		4.52681		3.58105
chr9	Q9D1F9	NM_008063	Slc37a4	glucose-6-phosphate exchanger SLC37A4	Slc37a4	glucose-6-phosphate translocase		4.00196	4.40949	2.32402	3.57849
chr11	Q3UVW2	NM_177408	Gabrg2	gamma-aminobutyric acid receptor subunit gamma-2 isoform 2 precursor	Gabrg2	gamma-aminobutyric acid receptor subunit gamma-2	4.26444			2.88486	3.57465
chr17	B2RRE8	NM_009847	Cd2ap	CD2-associated protein	Cd2ap	CD2-associated protein	2.88242		4.25205		3.56724
chr11	A2AHR2	NM_025988	Acbd4	acyl-CoA-binding domain-containing protein 4 isoform 1	Acbd4	acyl-Coenzyme A binding domain containing 4	2.14381	3.4561	5.09413		3.56468
chrX	Q99KG3-2	NM_001167776	Rbm10	RNA-binding protein 10 isoform 3	Rbm10	RNA-binding protein 10 isoform 3		3.66357		3.445	3.55429
chr15	Q8CGB6	NM_153533	Tns2	tensin-2	Tenc1	tensin-like C1 domain-containing phosphatase			4.70264	2.40406	3.55335
chr3	D3YVW2	NM_175193	Golim4	Golgi integral membrane protein 4 isoform 2	Golim4	Golgi integral membrane protein 4		4.6416	3.59473	2.39301	3.54311
chr5		NM_009879	Ift81	intraflagellar transport protein 81 homolog	Ift81	Mus musculus carnitine deficiency-associated gene expressed in ventricle 1-related protein (Cdv1R) mRNA, complete cds.	2.17316		4.89784		3.5355
chr5	Q6PD35	NM_001081465	Gtf2ird1	general transcription factor II-I repeat domain-containing protein 1 isoform d	Gtf2ird1	general transcription factor II-I repeat		2.69394		4.37461	3.53428
chr17	Q9D2G5	NM_001113352	Synj2	synaptojanin-2 isoform b	Synj2	synaptojanin-2 isoform b	5.16868	2.11165	2.72147	4.11067	3.52812
chr7	Q924Z6-2	NM_028816	Xpo6	exportin-6 isoform 2	Xpo6	exportin-6		4.40384		2.63001	3.51692
chr13		NM_001127346	Ndufaf2	mimitin, mitochondrial	Ndufaf2	Mus musculus mimitin mRNA for Myc-induced mitochondria protein, complete cds.	3.03436	3.801	3.70276		3.51271
chr17	Q6PBG2	NM_027244	Ndufa11	NADH dehydrogenase [ubiquinone] 1 alpha subcomplex subunit 11	Ndufa11	SubName: Full=Ndufa11 protein;		3.73207	3.55593	3.24211	3.51004
chr1	Q544N3	NM_008429	Kcnj9	G protein-activated inward rectifier potassium channel 3	Kcnj9	G protein-activated inward rectifier potassium		4.02356	2.90865	3.5961	3.50944
chr17	B8JK32	NM_029804	Hnrnpm	heterogeneous nuclear ribonucleoprotein M isoform a	Hnrnpm	SubName: Full=Heterogeneous nuclear ribonucleoprotein M;	3.43528	4.34266	2.84688	3.40018	3.50625
chr7	Q9DB85	NM_025897	Rrp8	ribosomal RNA-processing protein 8 isoform 2	Rrp8	ribosomal RNA-processing protein 8	3.42758	3.55603			3.4918
chr3	Q5BKP2	NM_001013024	Usp13	ubiquitin carboxyl-terminal hydrolase 13	Usp13	ubiquitin carboxyl-terminal hydrolase 13	3.76051		3.0554	3.65838	3.49143
chr7	Q78FW7	NM_013705	Zfp30	zinc finger protein 30	Zfp30	zinc finger protein 30			4.00971	2.95604	3.48287
chr5	P26618	NM_001083316	Pdgfra	platelet-derived growth factor receptor alpha isoform 1 precursor	Pdgfra	alpha-type platelet-derived growth factor		3.46058		3.49194	3.47626
chr2		NM_133673	Tor1b	torsin-1B precursor	Tor1b	Mus musculus mRNA for torsinB protein.		3.6434	3.30366		3.47353
chr5	Q544G1	NM_008066	Gabra2	gamma-aminobutyric acid receptor subunit alpha-2 precursor	Gabra2	SubName: Full=Gamma-aminobutyric acid (GABA-A) receptor, subunit alpha 2; SubName: Full=Putative uncharacterized protein;	3.01185	2.73423		4.67287	3.47298
chr3	Q6PFD8	NM_001177733	Plch1	1-phosphatidylinositol 4,5-bisphosphate phosphodiesterase eta-1 isoform 2	Plch1	SubName: Full=Plch1 protein;	3.67873		3.2627		3.47072
chr7	NP_081275	NM_026999	Zfp688	zinc finger protein 688	Zfp688	zinc finger protein 688	4.11545	2.80434			3.45989
chr16	Q6PFF0	NM_178923	Scaf4	splicing factor, arginine/serine-rich 15 isoform 1	Scaf4	splicing factor, arginine/serine-rich 15	2.42499	5.94068		2.01326	3.45964
chr13	Q80YE7-2	NM_134062	Dapk1	death-associated protein kinase 1 isoform 1	Dapk1	death-associated protein kinase 1	3.59855			3.31149	3.45502
chr12	B2RRY4	NM_019579	Mpp5	MAGUK p55 subfamily member 5	Mpp5	MAGUK p55 subfamily member 5		3.65598	4.14446	2.55701	3.45248
chr9	Q8CEE0	NM_026665	Cep57	centrosomal protein of 57 kDa isoform 1	Cep57	centrosomal protein of 57 kDa	4.19295	3.8264		2.33087	3.45007
chr8		NM_028200	Vps9d1	VPS9 domain-containing protein 1 isoform 2	1300018I17Rik	Mus musculus adult male liver cDNA, RIKEN full-length enriched library, clone:1300018I17 product:similar to COILED-COIL PROTEIN [Homo sapiens], full insert sequence.		2.8196		4.07828	3.44894
chr5		NM_172711	Guf1	translation factor Guf1, mitochondrial isoform 1	Guf1	Mus musculus adult male olfactory brain cDNA, RIKEN full-length enriched library, clone:6430628O11 product:hypothetical GTP-binding elongation factor containing protein, full insert sequence.	3.09279	4.01476	3.87547	2.78894	3.44299
chr11	Q9WVS8	NM_011841	Mapk7	mitogen-activated protein kinase 7 isoform a	Mapk7	mitogen-activated protein kinase 7	3.47864			3.40656	3.4426
chr18		NM_080465	Kcnn2	small conductance calcium-activated potassium channel protein 2 isoform SK2-S	Kcnn2	Mus musculus small-conductance calcium-activated potassium channel SK2 (SK2) mRNA, complete cds.	3.21222	3.6682			3.44021
chr18	Q50H70	NM_009700	Aqp4	aquaporin-4 isoform M1	Aqp4	aquaporin-4	2.03686			4.837	3.43693
chr8	Q0P678	NM_001029993	Zc3h18	zinc finger CCCH domain-containing protein 18 isoform a	Zc3h18	zinc finger CCCH domain-containing protein 18		3.17185	3.68996		3.43091
chr5	Q0VAZ2	NM_198422	Paqr3	progestin and adipoQ receptor family member 3	Paqr3	progestin and adipoQ receptor family member 3	2.93568	3.91515			3.42542
chr4	Q501J7	NM_175306	Phactr4	phosphatase and actin regulator 4 isoform 1	Phactr4	phosphatase and actin regulator 4 isoform 1		4.46689		2.38148	3.42419
chr11	Q3UTL8	NM_020492	Glra1	glycine receptor subunit alpha-1 isoform 2 precursor	Glra1	glycine receptor subunit alpha-1	2.31475	4.87484	3.24034	3.25279	3.42068
chr5		n/a	n/a	n/a	1700022K14Rik	Mus musculus adult male testis cDNA, RIKEN full-length enriched library, clone:1700022K14 product:unclassifiable, full insert sequence.	4.09178			2.7467	3.41924
chr8	NP_001139303	NM_001145831	Kifc3	kinesin-like protein KIFC3 isoform b	Kifc3	kinesin-like protein KIFC3 isoform b		3.54844		3.28523	3.41683
chrX	Q3UPL8	NM_001103367	Rai2	retinoic acid-induced protein 2	Rai2	retinoic acid-induced protein 2	4.415			2.40107	3.40803
chr7	Q6KAU8	NM_001111111	Atg16l2	autophagy-related protein 16-2	Atg16l2	autophagy-related protein 16-2		2.55407	4.2496		3.40184
chr10		NM_023138	Map2k2	dual specificity mitogen-activated protein kinase kinase 2 isoform 1	Map2k2	dual specificity mitogen-activated protein	4.05232		2.74689		3.39961
chr9_random		NR_027950	4930526I15Rik		n/a	Mus musculus adult female placenta cDNA, RIKEN full-length enriched library, clone:1600027J15 product:unclassifiable, full insert sequence.	3.60856	3.18773			3.39815
chr7	Q8BY46	NM_175477	Zfp574	zinc finger protein 574	Zfp574	zinc finger protein 574		4.22938	2.56481		3.3971
chr15	Q3UW66	NM_001162493	Mpst	3-mercaptopyruvate sulfurtransferase	Mpst	3-mercaptopyruvate sulfurtransferase			4.13683	2.65308	3.39495
chr11	B1AZ45	NM_001037754	Baiap2	brain-specific angiogenesis inhibitor 1-associated protein 2 isoform c	Baiap2	brain-specific angiogenesis inhibitor	3.43284	3.35674			3.39479
chr12	Q7SIG6-2	NM_001004364	Asap2	arf-GAP with SH3 domain, ANK repeat and PH domain-containing protein 2 isoform b	Asap2	arf-GAP with SH3 domain, ANK repeat and PH	2.96018	4.19402	3.68051	2.73163	3.39159
chr4	Q69ZU8	NM_001012451	Ankrd6	ankyrin repeat domain-containing protein 6	Ankrd6	ankyrin repeat domain-containing protein 6	2.91433		3.84718		3.38075
chr19		NM_028411	Tmem138	transmembrane protein 138 isoform 1	Tmem138	Mus musculus adult male testis cDNA, RIKEN full-length enriched library, clone:1700113I01 product:RIKEN cDNA 1700113I01 gene, full insert sequence.	3.09887			3.65519	3.37703
chr11	Q3TYF6	NM_138598	Fam104a	protein FAM104A	D11Wsu99e	SubName: Full=DNA segment, Chr 11, Wayne State University 99, expressed, isoform CRA_c; SubName: Full=Putative uncharacterized protein;			3.50167	3.24281	3.37224
chr8	B9EKP8	NM_172752	Sorbs2	sorbin and SH3 domain-containing protein 2 isoform 2	Sorbs2	sorbin and SH3 domain-containing protein 2	2.16314	4.56361			3.36337
chr8	Q6P8N6	NM_008097	Gcdh	glutaryl-CoA dehydrogenase, mitochondrial	Gcdh	glutaryl-CoA dehydrogenase, mitochondrial		4.03506	2.30464	3.74615	3.36195
chr2	A2RRI8	NM_173030	Galnt13	polypeptide N-acetylgalactosaminyltransferase 13	Galnt13	polypeptide N-acetylgalactosaminyltransferase		3.55586	3.16691		3.36139
chr19		NM_019424	Hps1	Hermansky-Pudlak syndrome 1 protein homolog isoform 1	Hps1	Mus musculus pale ear (ep wild type allele) mRNA, partial cds.	4.27033	2.69097	3.46492	2.99401	3.35506
chr6		n/a	n/a	n/a	n/a	Mus musculus adult male aorta and vein cDNA, RIKEN full-length enriched library, clone:A530001O10 product:unclassifiable, full insert sequence.	3.98605		3.48457	2.58016	3.35026
chr13	Q6EDY6	NM_026825	Carmil1	F-actin-uncapping protein LRRC16A isoform 1	Lrrc16a	leucine-rich repeat-containing protein 16A	2.18455		4.50439		3.34447
chr9	D3YUD9	NM_001146047	Lrrc49	leucine-rich repeat-containing protein 49 isoform 3	Lrrc49	SubName: Full=Putative uncharacterized protein Lrrc49;		3.48432	3.20223		3.34328
chr8	Q6ZQ08-2	NM_178078	Cnot1	CCR4-NOT transcription complex subunit 1 isoform 2	Cnot1	CCR4-NOT transcription complex subunit 1 isoform	2.45244			4.22913	3.34078
chr2	Q8CC12-2	NM_026891	Cdan1	codanin-1	Cdan1	codanin-1		3.32904		3.34761	3.33833
chr6	Q8R367	NM_181988	Rerg	ras-related and estrogen-regulated growth inhibitor isoform a	Rerg	ras-related and estrogen-regulated growth		2.94702		3.68966	3.31834
chr7	Q8CC84	NM_001191051	Lysmd4	lysM and putative peptidoglycan-binding domain-containing protein 4	Lysmd4	lysM and putative peptidoglycan-binding		3.16599		3.4702	3.3181
chr1		NM_172650	Kctd3	BTB/POZ domain-containing protein KCTD3	Kctd3	Mus musculus adult male colon cDNA, RIKEN full-length enriched library, clone:9030225E01 product:weakly similar to BA275K8.1 (NY-REN-45 ANTIGEN) [Homo sapiens], full insert sequence.			3.27873	3.34276	3.31074
chr11	A2A879	NM_028965	Snx11	sorting nexin-11	Snx11	sorting nexin-11	3.53566			3.07923	3.30744
chr5	Q6PFQ7	NM_133914	Rasa4	ras GTPase-activating protein 4 isoform 1	Rasa4	RecName: Full=Ras GTPase-activating protein 4; AltName: Full=Calcium-promoted Ras inactivator; AltName: Full=Ras p21 protein activator 4; AltName: Full=RasGAP-activating-like protein 2;	3.60711	2.87128		3.42422	3.30087
chr1	Q9JK45	NM_023872	Kcnq5	potassium voltage-gated channel subfamily KQT member 5 isoform 2	Kcnq5	potassium voltage-gated channel subfamily KQT	3.57457		3.01911		3.29684
chr12	B2RR82	NM_001198968	Itsn2	intersectin-2 isoform 1	Itsn2	intersectin-2 isoform 1	4.39141		3.35669	2.12667	3.29159
chr9	D3Z0L1	NM_172289	Slc36a4	proton-coupled amino acid transporter 4	Slc36a4	SubName: Full=Putative uncharacterized protein Slc36a4;		3.40601	3.17706		3.29154
chr2	Q3UPQ8	NM_177263	Zhx3	zinc fingers and homeoboxes protein 3	Zhx3	zinc fingers and homeoboxes protein 3		2.54025	2.39881	4.91927	3.28611
chr11	Q5SUV1	NM_001013381	Rsad1	radical S-adenosyl methionine domain-containing protein 1, mitochondrial precursor	Rsad1	RecName: Full=Radical S-adenosyl methionine domain-containing protein 1, mitochondrial; EC=1.3.99.-; AltName: Full=Oxygen-independent coproporphyrinogen-III oxidase-like protein RSAD1; Flags: Precursor;	3.35511	3.21638			3.28574
chr3	Q8C7W7	NM_133865	Dclre1b	5' exonuclease Apollo isoform a	Dclre1b	5' exonuclease Apollo isoform a		3.87393	2.68936		3.28165
chrX	Q8BLJ6	NM_172781	Klhl4	kelch-like protein 4 isoform 1	Klhl4	kelch-like protein 4		3.15206	3.40368		3.27787
chr9		n/a	n/a	n/a	B230323A14Rik	Mus musculus adult male hypothalamus cDNA, RIKEN full-length enriched library, clone:A230012I20 product:unclassifiable, full insert sequence.	3.10969	3.43512			3.27241
chr12	Q05BC3	NM_001043335	Eml1	echinoderm microtubule-associated protein-like 1 isoform 1	Eml1	echinoderm microtubule-associated protein-like 1			2.87802	3.66578	3.2719
chr6	D3YX49	NM_175557	Zfp384	zinc finger protein 384 isoform 1	Zfp384	zinc finger protein 384	2.92723		3.60846		3.26785
chr19	Q8JZT6	NM_001164099	Add3	gamma-adducin isoform a	Add3	gamma-adducin isoform a	3.64552			2.88592	3.26572
chr17	Q5SSN7	NM_134114	Sft2d1	vesicle transport protein SFT2A	Sft2d1	vesicle transport protein SFT2A		2.47474	4.05473		3.26473
chr13	Q3UQU0	NM_001024508	Brd9	bromodomain-containing protein 9 isoform 1	Brd9	bromodomain-containing protein 9			3.74481	2.75913	3.25197
chr10	Q8CH18	NM_026201	Ccar1	cell division cycle and apoptosis regulator protein 1	Ccar1	cell division cycle and apoptosis regulator	3.50882	2.97566			3.24224
chr8	Q8BWH0	NM_172758	Slc38a7	putative sodium-coupled neutral amino acid transporter 7	Slc38a7	putative sodium-coupled neutral amino acid			3.29627	3.18742	3.24184
chr19	Q91XE4	NM_027857	n/a	n/a	Acy3	aspartoacylase-2	2.05086	4.42559			3.23822
chr11	Q923U0-3	NM_028011	Tom1l1	TOM1-like protein 1	Tom1l1	TOM1-like protein 1			3.21285	3.26155	3.2372
chr10	Q7TNB8-2	NM_183426	Sbno2	protein strawberry notch homolog 2	Sbno2	protein strawberry notch homolog 2	3.74489	3.28661	2.67897		3.23682
chr16	Q9DCE3	NM_016881	Pmm2	phosphomannomutase 2	Pmm2	phosphomannomutase 2	3.88488	3.71358		2.10906	3.23584
chr13	Q3UD82	NM_001081009	Parp8	poly [ADP-ribose] polymerase 8	Parp8	RecName: Full=Poly [ADP-ribose] polymerase 8; Short=PARP-8; EC=2.4.2.30;	2.02857		4.43578		3.23218
chr9	Q9Z2X8	NM_001110305	Keap1	kelch-like ECH-associated protein 1	Keap1	kelch-like ECH-associated protein 1	3.67189		2.78968		3.23079
chr11		NM_011900	Mpdu1	mannose-P-dolichol utilization defect 1 protein isoform 1	Mpdu1	Mus musculus mRNA for Supl15h, complete cds.		4.10453		2.34711	3.22582
chr9		NM_173038	Tbcel	tubulin-specific chaperone cofactor E-like protein	Tbcel	Mus musculus adult male corpora quadrigemina cDNA, RIKEN full-length enriched library, clone:B230385G11 product:genomic DNA; unknown EST, full insert sequence.	2.78634	2.0539	4.8211		3.22045
chr8	NP_932137	NM_198020	Trmt1	tRNA (guanine(26)-N(2))-dimethyltransferase isoform 1	Trmt1	N(2),N(2)-dimethylguanosine tRNA			3.14357	3.29026	3.21692
chr5	Q9QUK0-2	NM_177270	Cdkl2	cyclin-dependent kinase-like 2 isoform 2	Cdkl2	cyclin-dependent kinase-like 2 isoform 2		3.61235	2.8133		3.21283
chr8		NM_028170	1700030K09Rik	uncharacterized protein C19orf44 homolog	1700030K09Rik	hypothetical protein LOC72254	3.2251			3.19728	3.21119
chr7	NP_058564	NM_016868	Hif3a	hypoxia-inducible factor 3-alpha isoform 2	Hif3a	hypoxia-inducible factor 3-alpha isoform 2	2.13326		4.28301		3.20813
chr7	Q7TMY2	NM_025826	Acadsb	short/branched chain specific acyl-CoA dehydrogenase, mitochondrial	Acadsb	short/branched chain specific acyl-CoA		4.09022		2.31251	3.20137
chr8		NM_028000	Plpp5	phospholipid phosphatase 5 isoform 1	Ppapdc1b	Mus musculus 10 day old male pancreas cDNA, RIKEN full-length enriched library, clone:1810019D05 product:weakly similar to HTPAP [Homo sapiens], full insert sequence.		3.49311	2.90565		3.19938
chr18	B2RR24	NM_177832	Zfp236	zinc finger protein 236	Zfp236	zinc finger protein 236	2.21566			4.17892	3.19729
chr10	NP_001157623	NM_001164151	Tcf3	transcription factor E2-alpha isoform 5	Tcf3	transcription factor E2-alpha isoform 5	2.12018		4.26423		3.19221
chr19	Q810A3	NM_027412	Ttc9c	tetratricopeptide repeat protein 9C	Ttc9c	tetratricopeptide repeat protein 9C		2.49313	3.88353		3.18833
chr2	NP_001132976	NM_001139504	Dnlz	DNL-type zinc finger protein isoform 3	Dnlz	DNL-type zinc finger protein isoform 3	3.53069			2.84072	3.18571
chr2	Q3TWM5	NM_016902	Nphp1	nephrocystin-1 isoform a	Nphp1	nephrocystin-1	2.46788	4.50988		2.5595	3.17909
chr2	A2AHG2	NM_001109690	Phf21a	PHD finger protein 21A isoform 2	Phf21a	PHD finger protein 21A isoform 2	2.03168		4.03035	3.47273	3.17825
chr8	Q6ZPR1	NM_025747	Cfap97	cilia- and flagella-associated protein 97	4933411K20Rik	hypothetical protein LOC66756		3.86851	2.47375		3.17113
chr17	Q4KN81	NM_010392	H2-Q2	histocompatibility 2, Q region locus 2 precursor	H2-Q2	histocompatibility 2, Q region locus 2	2.96917	3.36537			3.16727
chr2	A2AVP4	NM_001100591	Rc3h2	roquin-2 isoform a	Rc3h2	SubName: Full=Ring finger and CCCH-type zinc finger domains 2;	2.76775		3.00379	3.72275	3.16476
chr5	Q921V2	NM_001044705	Zscan21	zinc finger and SCAN domain-containing protein 21	Zscan21	zinc finger and SCAN domain-containing protein	3.16129		3.16203		3.16166
chr2	Q6WJ10	NM_207669	Gabpb1	GA-binding protein subunit beta-1 isoform a	Gabpb1	SubName: Full=GA binding protein subunit beta1;		3.68155	2.62796		3.15475
chr17	NP_001074538	NM_001081069	Rgs11	regulator of G-protein signaling 11	Rgs11	regulator of G-protein signaling 11			3.07247	3.21051	3.14149
chr9	NP_001074518	NM_001081049	Kmt2a	histone-lysine N-methyltransferase 2A	Mll1	histone-lysine N-methyltransferase MLL		2.58143		3.69601	3.13872
chr4	A2AJX0	NM_001163020	Klhl32	kelch-like protein 32 isoform 1	Klhl32	kelch-like 32 isoform 1	3.77166	3.39888	2.24254		3.13769
chr8	A6H618	NM_029965	Rnf170	E3 ubiquitin-protein ligase RNF170	Rnf170	RING finger protein 170	2.08667	4.18503			3.13585
chr9	Q9WUE3	NM_019720	Cyb561d2	cytochrome b561 domain-containing protein 2	Cyb561d2	cytochrome b561 domain-containing protein 2	2.4923	3.67631		3.2267	3.13177
chr3	D3Z3X4	NM_025902	Cisd2	CDGSH iron-sulfur domain-containing protein 2	Cisd2	CDGSH iron-sulfur domain-containing protein 2		2.8359		3.42709	3.1315
chr1	B1AT42	NM_001077405	Nrp2	neuropilin-2 isoform 4 precursor	Nrp2	neuropilin-2 isoform 4 precursor		4.1143	2.14796		3.13113
chr4	B1ASG4	NM_010173	Faah	fatty-acid amide hydrolase 1	Faah	fatty-acid amide hydrolase 1			3.02226	3.23286	3.12756
chr7	Q3TYF8	NM_028308	Mob2	MOB kinase activator 2 isoform 1	2700078K21Rik	SubName: Full=Putative uncharacterized protein;		3.26324	2.98434		3.12379
chr19		NM_001081319	Ric1	RAB6A-GEF complex partner protein 1	C030046E11Rik	Mus musculus 0 day neonate cerebellum cDNA, RIKEN full-length enriched library, clone:C230006L13 product:similar to BA207C16.2 (NOVEL PROTEIN SIMILAR TO C. ELEGANS R06F6.8 (SW:Q09417) (CONTAINS KIAA1432)) (FRAGMENT) [Homo sapiens], full insert sequence.		2.80879	3.4286		3.11869
chr17		NM_001162909	Spaca6	sperm acrosome membrane-associated protein 6 precursor	Ncrna00085	Mus musculus adult male testis cDNA, RIKEN full-length enriched library, clone:4930546H06 product:hypothetical protein, full insert sequence.		2.31624	4.23551	2.78856	3.11344
chr4	Q3TLP5-3	NM_026728	Echdc2	enoyl-CoA hydratase domain-containing protein 2, mitochondrial isoform 1 precursor	Echdc2	enoyl-CoA hydratase domain-containing protein 2,	2.32962			3.89531	3.11246
chr15	Q9QXW0-3	NM_013909	Fbxl6	F-box/LRR-repeat protein 6	Fbxl6	RecName: Full=F-box/LRR-repeat protein 6; AltName: Full=F-box and leucine-rich repeat protein 6; AltName: Full=F-box protein FBL6;	2.37947		4.44927	2.44322	3.09065
chr14	Q8BWG2	NM_001033668	Dnah1	dynein heavy chain 1, axonemal	Dnahc1	SubName: Full=Putative uncharacterized protein;	3.82746	2.69496	2.74508		3.08917
chr9	Q80Y83	NM_178118	Dixdc1	dixin isoform 1	Dixdc1	dixin	2.95964		3.21552		3.08758
chr18	Q69ZX8	NM_198649	Ablim3	actin-binding LIM protein 3	Ablim3	actin-binding LIM protein 3	4.15883	2.65695	2.44225		3.08601
chr1	NP_065604	NM_020579	B4galt3	beta-1,4-galactosyltransferase 3	B4galt3	beta-1,4-galactosyltransferase 3			2.49486	3.67243	3.08364
chr18	Q9QZ85	NM_021792	Iigp1	interferon-inducible GTPase 1	Iigp1	interferon-inducible GTPase 1		3.84737	2.31324		3.08031
chr17	NP_663458	NM_145483	Zfp160	zinc finger protein 160	Zfp160	zinc finger protein 160	3.40959	3.55344	2.27723		3.08009
chr11	A4FUW1	NM_028898	Rptor	regulatory-associated protein of mTOR isoform 1	Rptor	SubName: Full=4932417H02Rik protein; Flags: Fragment;		2.84245	3.3058		3.07412
chr1	B5TVM2	NM_001164528	Ildr2	immunoglobulin-like domain-containing receptor 2 precursor	Ildr2	Lisch-like	3.56635	2.37572		3.27559	3.07255
chr9	Q545S6	NM_170777	Elof1	transcription elongation factor 1 homolog	Elof1	transcription elongation factor 1 homolog		4.05626		2.08318	3.06972
chr19		NM_027654	Pcgf6	polycomb group RING finger protein 6	Pcgf6	Mus musculus mMBLR mRNA, complete cds.	2.38275	2.96859	3.82523		3.05886
chr17	Q6PAT2	NM_198647	Tbc1d22b	TBC1 domain family member 22B	Tbc1d22b	SubName: Full=Tbc1d22b protein;	2.46884		3.61247		3.04066
chr12	B2RQI4	NM_172152	Slc24a4	sodium/potassium/calcium exchanger 4 precursor	Slc24a4	sodium/potassium/calcium exchanger 4 precursor	2.23845	3.84256			3.04051
chr19	Q62417	NM_178362	Sorbs1	sorbin and SH3 domain-containing protein 1 isoform 2	Sorbs1	sorbin and SH3 domain-containing protein 1	3.93197			2.14799	3.03998
chr2	Q3TDM2	NM_177343	Camk1d	calcium/calmodulin-dependent protein kinase type 1D isoform a	Camk1d	SubName: Full=Putative uncharacterized protein;		2.09786		3.98023	3.03904
chr19	Q5DTT2-2	NM_028627	Psd	PH and SEC7 domain-containing protein 1 isoform 1	Psd	PH and SEC7 domain-containing protein 1			3.23348	2.84175	3.03762
chr1	NP_032809	NM_183355	Pbx1	pre-B-cell leukemia transcription factor 1 isoform a	Pbx1	pre-B-cell leukemia transcription factor 1	2.77417			3.28136	3.02776
chr15		NM_172958	Mtmr12	myotubularin-related protein 12	Mtmr12	Mus musculus adult male testis cDNA, RIKEN full-length enriched library, clone:4932703C11 product:PHOSPHATIDYLINOSITOL-3 PHOSPHATE 3-PHOSPHATASE ADAPTOR SUBUNIT homolog [Homo sapiens], full insert sequence.		3.8038	2.24807		3.02593
chr12	Q8R0W1-2	NR_033623	n/a	n/a	2310044G17Rik	RecName: Full=Uncharacterized protein KIAA1737;			2.57361	3.47639	3.025
chr11		NM_172439	Inpp5j	phosphatidylinositol 4,5-bisphosphate 5-phosphatase A	Inpp5j	Mus musculus adult male diencephalon cDNA, RIKEN full-length enriched library, clone:9330171B07 product:PROLINE-RICH INOSITOL POLYPHOSPHATE 5-PHOSPHATASE homolog [Rattus norvegicus], full insert sequence.			3.02612	3.02331	3.02472
chr16	Q9EQM6	NM_033324	Dgcr8	microprocessor complex subunit DGCR8	Dgcr8	RecName: Full=Microprocessor complex subunit DGCR8; AltName: Full=DiGeorge syndrome critical region 8 homolog; AltName: Full=Gy1;	2.22728	4.02439		2.80548	3.01905
chr2	Q3V1D8	NM_001033451	Zfp408	zinc finger protein 408 isoform 2	Zfp408	zinc finger protein 408		3.59858		2.43882	3.0187
chrX		NR_026976	n/a	n/a	6720401G13Rik	Mus musculus adult male thymus cDNA, RIKEN full-length enriched library, clone:5830467J12 product:unclassifiable, full insert sequence.	2.45499		3.57109		3.01304
chr9	Q8R472	NM_019814	Higd1a	HIG1 domain family member 1A, mitochondrial	Higd1a	HIG1 domain family member 1A	2.8239	2.81067	3.40182		3.01213
chr3	Q8BYK6-3	NM_172677	Ythdf3	YTH domain-containing family protein 3 isoform 1	Ythdf3	YTH domain family protein 3 isoform 1	3.68502		2.32886		3.00694
chr16	Q7TSH6	NM_178923	Scaf4	splicing factor, arginine/serine-rich 15 isoform 1	Scaf4	splicing factor, arginine/serine-rich 15		3.508		2.48522	2.99661
chr13	Q91VL6	NM_146231	Zfp825	zinc finger protein 124	Zfp825	zinc finger protein 124	3.44426		2.54758		2.99592
chrX		NM_145405	Ubl4a	ubiquitin-like protein 4A	Ubl4	Mus musculus partial mRNA for ubiquitin-like protein GDX (Ubl4 gene).	3.23872	2.80925	2.93433		2.9941
chr10	Q9DAX2	NM_015817	Plpp2	phospholipid phosphatase 2 isoform 1	Ppap2c	lipid phosphate phosphohydrolase 2	2.06481	3.90928			2.98705
chr7	Q66JW5	NM_027532	Anapc15	anaphase-promoting complex subunit 15 isoform c	3200002M19Rik	hypothetical protein LOC75430		3.06354	2.89473		2.97914
chr7	Q8BGR5-2	NM_175268	Fam53b	protein FAM53B isoform a	Fam53b	hypothetical protein LOC77938	2.56844	3.14864	2.96987	3.22073	2.97692
chr13	Q8BGR6	NM_172595	Arl15	ADP-ribosylation factor-like protein 15	Arl15	ADP-ribosylation factor-like protein 15	3.71252			2.22269	2.9676
chr11		NM_153545	Lrrc45	leucine-rich repeat-containing protein 45	Lrrc45	Mus musculus 16 days embryo head cDNA, RIKEN full-length enriched library, clone:C130042M23 product:similar to HYPOTHETICAL 76.0 KDA PROTEIN [Homo sapiens], full insert sequence.	3.81483		2.1126		2.96372
chr6	Q8R0L9-2	NM_133932	Tada3	transcriptional adapter 3	Tada3	transcriptional adapter 3	2.79038		3.19562	2.90179	2.9626
chrX	NP_598752	NM_133991	Ftsj1	putative tRNA (cytidine(32)/guanosine(34)-2'-O)-methyltransferase isoform 1	Ftsj1	Ftsj homolog	3.28411	2.62594			2.95503
chr10	NP_033189	NM_009163	Sgpl1	sphingosine-1-phosphate lyase 1	Sgpl1	sphingosine-1-phosphate lyase 1			3.18791	2.7219	2.95491
chr9	Q69ZY9	NM_177771	Klhl18	kelch-like protein 18	Klhl18	kelch-like 18	2.79808			3.11089	2.95449
chr3	Q9DBT5	NM_028779	Ampd2	AMP deaminase 2 isoform b	Ampd2	AMP deaminase 2	2.50031			3.40473	2.95252
chr13	P56388	NM_013732	Cartpt	cocaine- and amphetamine-regulated transcript protein isoform 1 preproprotein	Cartpt	cocaine- and amphetamine-regulated transcript	4.37619	2.48913	2.51287	2.4118	2.9475
chr14	Q9D375	NM_025341	Abhd6	monoacylglycerol lipase ABHD6 isoform 1	Abhd6	monoacylglycerol lipase ABHD6	2.6641	2.326	3.35845	3.42364	2.94305
chr15	Q9QXW0-3	NM_013909	Fbxl6	F-box/LRR-repeat protein 6	Fbxl6	F-box/LRR-repeat protein 6	2.27101	3.79709	2.75731		2.9418
chr17	Q80YR4-3	NM_183149	Zfp598	E3 ubiquitin-protein ligase ZNF598 isoform 1	Zfp598	zinc finger protein 598	2.04981	2.61369		4.14121	2.9349
chr14		NR_015539	9630013A20Rik		n/a	Mus musculus 16 days neonate cerebellum cDNA, RIKEN full-length enriched library, clone:9630013A20 product:unclassifiable, full insert sequence.	2.143		3.72598		2.93449
chr15		NM_177461	Micall1	MICAL-like protein 1	Micall1	Mus musculus 10 day old male pancreas cDNA, RIKEN full-length enriched library, clone:1810049L14 product:Molecule interacting with Rab13 (MIRab13) (Fragment) homolog [Mus musculus], full insert sequence.	2.27848		3.5898		2.93414
chr9	Q3UVC9	NM_019750	Nat6	N-acetyltransferase 6	Nat6	N-acetyltransferase 6		3.05275		2.81181	2.93228
chr4	B1ASS4	NM_026279	Bend5	BEN domain-containing protein 5	Bend5	BEN domain-containing protein 5	2.30923	3.2756	3.21067		2.93183
chr5	Q9D1H0	NM_133908	Rita1	RBPJ-interacting and tubulin-associated protein 1	1110008J03Rik	hypothetical protein LOC100764	2.42255		3.436		2.92928
chr4		NM_025873	Trit1	tRNA dimethylallyltransferase, mitochondrial precursor	Trit1	Mus musculus 18-day embryo whole body cDNA, RIKEN full-length enriched library, clone:1110007O17 product:TRNA ISOPENTENYLPYROPHOSPHATE TRANSFERASE homolog [Homo sapiens], full insert sequence.		2.334	3.51902		2.92651
chr2	A2ATP5	NM_001162418	Myef2	myelin expression factor 2 isoform 3	Myef2	myelin expression factor 2 isoform 3		3.40108		2.44207	2.92157
chr16	NP_001152893	NM_001159421	Ccdc58	coiled-coil domain-containing protein 58 isoform 2	Ccdc58	coiled-coil domain-containing protein 58 isoform	3.65238		2.18412		2.91825
chr19	NP_689344	NM_152220	Stx3	syntaxin-3 isoform A	Stx3	syntaxin-3 isoform A		3.49846	2.33533		2.9169
chr19	Q9JHF5	NM_016921	Tcirg1	V-type proton ATPase 116 kDa subunit a	Tcirg1	T-cell, immune regulator 1		2.6644	3.16154		2.91297
chr2	Q9D050	NM_019758	Mtch2	mitochondrial carrier homolog 2 isoform 1	Mtch2	mitochondrial carrier homolog 2			2.47934	3.33848	2.90891
chr7	Q3UIL6-6	NM_172743	Plekha7	pleckstrin homology domain-containing family A member 7 isoform 3	Plekha7	pleckstrin homology domain-containing family A	3.3107	2.50384			2.90727
chr18		n/a	n/a	n/a	Gm17238	Mus musculus adult male epididymis cDNA, RIKEN full-length enriched library, clone:9230001K01 product:unclassifiable, full insert sequence.	3.3252		2.47767		2.90144
chr3	Q3TAK4	NM_019995	Supt20	transcription factor SPT20 homolog	Fam48a	SubName: Full=Putative uncharacterized protein;	2.15489	3.29027	3.24898		2.89805
chr2	A2AQD4	NM_080558	Ssfa2	sperm-specific antigen 2 homolog	Ssfa2	sperm-specific antigen 2 homolog		2.46755	3.32647		2.89701
chr3	Q8BGN2	NM_001099785	D3Ertd751e	UPF0462 protein C4orf33 homolog isoform a	D3Ertd751e	hypothetical protein LOC73852 isoform a			3.76518	2.02761	2.8964
chr18	Q6P926	NM_029485	Spata24	spermatogenesis-associated protein 24 isoform 2	Spata24	spermatogenesis-associated protein 24 isoform 2	3.22522		2.56636		2.89579
chr6	Q9DAQ4-3	NM_027948	1700003E16Rik	uncharacterized protein C2orf81 homolog	1700003E16Rik	RecName: Full=Uncharacterized protein C2orf81 homolog;		2.15914	3.62751		2.89332
chr6	Q810B2	NM_011350	Sema4f	semaphorin-4F isoform a precursor	Sema4f	SubName: Full=Semaphorin M; Flags: Fragment;	3.54759			2.23595	2.89177
chr15	Q9JI10-2	NM_019635	Stk3	serine/threonine-protein kinase 3	Stk3	serine/threonine-protein kinase 3		2.732	3.05122		2.89161
chr11	A2RTJ4	NM_008711	Nog	noggin precursor	Nog	noggin precursor	2.46966	3.3108			2.89023
chr2	A3KGJ7	NM_001130000	Cep250	centrosome-associated protein CEP250 isoform 3	Cep250	centrosome-associated protein CEP250 isoform 1	2.1045	3.66591			2.88521
chr3	NP_001161468	NM_001167996	1110032F04Rik	uncharacterized membrane protein C3orf80 homolog precursor	1110032F04Rik	hypothetical protein LOC68725 precursor	2.88165		2.88336		2.88251
chr2	Q3U8L1	NM_009422	Traf2	TNF receptor-associated factor 2 isoform b	Traf2	TNF receptor-associated factor 2	3.24229		2.51951		2.8809
chrX	A2AF31	NM_207267	Tmsb15l	Tmsb15b1-Tmsb15b2 protein	Tmsb15l	thymosin beta-like			2.74701	3.01293	2.87997
chr17		NM_019774	Akap8	A-kinase anchor protein 8	Akap8	Mus musculus AKAP95 mRNA for A kinase anchor protein 95, complete cds.	2.00406	2.02713	4.60212		2.87777
chr8	Q8K2A7	NM_027590	Ints10	integrator complex subunit 10 isoform 3	Ints10	integrator complex subunit 10	2.77309	2.226		3.62717	2.87542
chr11	A2AWT6	NM_011551	Ubtf	nucleolar transcription factor 1 isoform 1	Ubtf	nucleolar transcription factor 1 isoform 2	2.71775		3.03229		2.87502
chr3	P54869	NM_008256	Hmgcs2	hydroxymethylglutaryl-CoA synthase, mitochondrial precursor	Hmgcs2	hydroxymethylglutaryl-CoA synthase,	2.02975	3.71989			2.87482
chr17	Q6NZH9	NM_001166493	Rasgrp3	ras guanyl-releasing protein 3	Rasgrp3	RAS, guanyl releasing protein 3		3.31063		2.43228	2.87146
chr17	B2RX81	NM_001100452	Bicral	BRD4-interacting chromatin-remodeling complex-associated protein-like	BC032203	hypothetical protein LOC210982	2.67074		2.62675	3.31	2.86916
chr17	O88286-2	NM_212438	Wiz	protein Wiz isoform 1	Wiz	protein Wiz isoform 2	3.04125		2.69005		2.86565
chr12	Q4VAC9-2	NM_153804	Plekhg3	pleckstrin homology domain-containing family G member 3	Plekhg3	RecName: Full=Pleckstrin homology domain-containing family G member 3; Short=PH domain-containing family G member 3;		3.08465		2.64649	2.86557
chr9	Q8BHE4	NM_178638	Tmem108	transmembrane protein 108 precursor	Tmem108	transmembrane protein 108 precursor	2.79956	3.32355		2.46076	2.86129
chr18		NM_001081256	Kdm3b	lysine-specific demethylase 3B	Kdm3b	Mus musculus adult male thymus cDNA, RIKEN full-length enriched library, clone:5830462I21 product:PUTATIVE ZINC FINGER PROTEIN homolog [Homo sapiens], full insert sequence.	2.77024	3.23442	2.56717		2.85728
chr13	NP_062424	NM_019551	Tdp2	tyrosyl-DNA phosphodiesterase 2	Tdp2	tyrosyl-DNA phosphodiesterase 2	2.51011		3.20141		2.85576
chrX		NM_178754	Arhgap6	rho GTPase-activating protein 6 isoform b	Arhgap6	Mus musculus rho-type GTPase-activating protein rhoGAPX-1 (Arhgap6) mRNA, complete cds.	3.43135		2.83665	2.29801	2.85534
chr11	Q5NBX1-2	NM_172496	Cobl	protein cordon-bleu isoform 1	Cobl	RecName: Full=Protein cordon-bleu;	3.32372		2.37183		2.84777
chr9	Q499E4-2	NM_028258	Dzip1l	zinc finger protein DZIP1L isoform 1	Dzip1l	zinc finger protein DZIP1L	3.14607		2.54806		2.84706
chr14	Q3U2E2	NM_144842	Zmym5	zinc finger MYM-type protein 5	Zmym5	zinc finger MYM-type protein 5	2.31957		2.23781	3.9832	2.84686
chr19	Q8R0J4	NM_001078649	Tmem134	transmembrane protein 134 isoform a	Tmem134	transmembrane protein 134 isoform a	2.92868		2.75465		2.84166
chr9	Q542Q9	NM_010287	Gpr83	probable G-protein coupled receptor 83 isoform 1 precursor	Gpr83	probable G-protein coupled receptor 83	2.99616	2.68659			2.84138
chr7		NM_001177412	Usp35	ubiquitin carboxyl-terminal hydrolase 35	Usp35	Mus musculus ubiquitin specific peptidase 35, mRNA (cDNA clone IMAGE:6419471).	2.98684	2.69231			2.83957
chr6	A6H6S0	NM_028705	Herc3	probable E3 ubiquitin-protein ligase HERC3	Herc3	hect domain and RLD 3		3.58271	2.79095	2.14468	2.83945
chr3	NP_001074698	NM_001081229	Tsc22d2	TSC22 domain family protein 2 isoform 1	Tsc22d2	TSC22 domain family protein 2	2.02412	3.05235		3.4329	2.83646
chr2	A2AHG0	NM_197945	Lzts3	leucine zipper putative tumor suppressor 3 isoform a	Prosapip1	proSAP-interacting protein 1	2.30728	3.47296	2.68005	2.88394	2.83606
chr4	Q3TY13	NM_019874	Dnajb5	dnaJ homolog subfamily B member 5	Dnajb5	dnaJ homolog subfamily B member 5			2.20026	3.47046	2.83536
chr5		NR_015546	C130026L21Rik		C130026L21Rik	Mus musculus adult male hypothalamus cDNA, RIKEN full-length enriched library, clone:A230073N08 product:unclassifiable, full insert sequence.		3.63995	2.02569		2.83282
chr11	Q80UG5	NM_001113486	42987	septin-9 isoform a	2021-09-10	septin-9 isoform a	2.25166	2.81891	3.42416		2.83158
chr11	A2A870-2	NM_172571	Fbf1	fas-binding factor 1	Fbf1	RecName: Full=Fas-binding factor 1; Short=FBF-1;	2.87908	2.97261	2.63417		2.82862
chr9	Q9Z1B4	NM_019676	Plcd1	1-phosphatidylinositol 4,5-bisphosphate phosphodiesterase delta-1 isoform 2	Plcd1	1-phosphatidylinositol-4,5-bisphosphate	2.65343		3.00003		2.82673
chr13		NR_029419	Tmem161b		Tmem161b	transmembrane protein 161B	2.13229		3.52053		2.82641
chr8	Q3UTQ6	NM_172754	Zfp868	Kruppel-like zinc finger protein	Zfp868	Kruppel-like zinc finger protein	2.69874		2.90931	2.86692	2.82499
chr2	Q3TYI4	NM_013613	Nr4a2	nuclear receptor subfamily 4 group A member 2	Nr4a2	nuclear receptor subfamily 4 group A member 2	2.11067	3.3698	3.62423	2.19377	2.82462
chr8	Q8CD26	NM_177766	Slc35e1	solute carrier family 35 member E1	Slc35e1	RecName: Full=Solute carrier family 35 member E1;	3.43442			2.21342	2.82392
chr18	Q76LL6-4	NM_175276	Fhod3	FH1/FH2 domain-containing protein 3 isoform 1	Fhod3	FH1/FH2 domain-containing protein 3	2.13163	3.51302			2.82233
chr7	Q8BHJ7	NM_176942	Gabra5	gamma-aminobutyric acid receptor subunit alpha-5 precursor	Gabra5	gamma-aminobutyric acid receptor subunit alpha-5	3.60916		2.02679		2.81798
chr10		NM_177373	Ppfia2	liprin-alpha-2 isoform 2	Ppfia2	Mus musculus 0 day neonate eyeball cDNA, RIKEN full-length enriched library, clone:E130120L08 product:hypothetical SAM domain (Sterile alpha motif) containing protein, full insert sequence.	2.9668		2.66791		2.81736
chr8	B2RXX0	NM_175089	Nek1	serine/threonine-protein kinase Nek1 isoform 3	Nek1	serine/threonine-protein kinase Nek1	2.60806	3.56777		2.27418	2.81667
chr11	A2AFQ6	NM_026949	Cnot8	CCR4-NOT transcription complex subunit 8	Cnot8	CCR4-NOT transcription complex subunit 8		3.5226		2.10943	2.81602
chr13	Q3UHF3	NM_172593	Mier3	mesoderm induction early response protein 3	Mier3	mesoderm induction early response protein 3	2.74798	3.43307		2.2513	2.81078
chr4	A2AA81	NM_172122	Crocc	rootletin isoform 1	Crocc	rootletin isoform 1		2.1619	2.9842	3.28085	2.80898
chr4	Q921H9	NM_027250	Coa7	cytochrome c oxidase assembly factor 7	2010305A19Rik	RecName: Full=Hcp beta-lactamase-like protein C1orf163 homolog;	3.00843		2.59706		2.80274
chr5		n/a	n/a	n/a	Gm10419	Mus musculus adult male hippocampus cDNA, RIKEN full-length enriched library, clone:C630049E18 product:hypothetical protein, full insert sequence.	2.73123		2.86116	2.81356	2.80198
chr11	Q921U8	NM_013870	Smtn	smoothelin isoform b	Smtn	smoothelin		2.95346		2.63011	2.79178
chr19	Q3TKZ9	NM_053086	Nolc1	nucleolar and coiled-body phosphoprotein 1 isoform A	Nolc1	nucleolar and coiled-body phosphoprotein 1		2.34784	3.23451		2.79117
chr19	Q8VE10	NM_027643	Naa40	N-alpha-acetyltransferase 40	Naa40	RecName: Full=N-alpha-acetyltransferase 40, NatD catalytic subunit; EC=2.3.1.-; AltName: Full=N-acetyltransferase 11;	2.57687		3.00009		2.78848
chr2	A2AS54	NM_015792	Fbxo18	F-box DNA helicase 1 isoform 1	Fbxo18	F-box only protein 18	3.03493			2.54162	2.78828
chr2	Q9D9M5	NM_028521	Phospho2	pyridoxal phosphate phosphatase PHOSPHO2	Phospho2	pyridoxal phosphate phosphatase PHOSPHO2	3.46307			2.10836	2.78571
chr17	Q3TDP9	NM_145158	Emilin2	EMILIN-2 precursor	Emilin2	EMILIN-2 precursor	2.08679		3.48454		2.78566
chr7	Q3U288	NM_001145999	Zfp710	zinc finger protein 710 isoform a	Zfp710	zinc finger protein 710 isoform a	3.14944	2.41944			2.78444
chr8		NR_033430	Gm2694		Gm2694	Mus musculus 10 days neonate cerebellum cDNA, RIKEN full-length enriched library, clone:6530404G16 product:hypothetical protein, full insert sequence.	3.17181			2.39529	2.78355
chr11	Q6PIX9	NM_177777	D11Wsu47e	uncharacterized protein C17orf80 homolog	D11Wsu47e	lung cancer-related protein 8	2.59002	2.73288	2.9275	2.87825	2.78216
chr10	Q7TPG7	NM_182807	Fam19a2	protein FAM19A2 isoform 1	Fam19a2	TAFA2 protein	3.14602		2.41663		2.78132
chr15	Q80U07	NM_007405	Adcy6	adenylate cyclase type 6	Adcy6	SubName: Full=MKIAA0422 protein; Flags: Fragment;	3.15713		2.37056	2.80358	2.77709
chr9		NM_001039519	Gtf2a2	transcription initiation factor IIA subunit 2 isoform 1	Gtf2a2	Mus musculus 2 days neonate thymus thymic cells cDNA, RIKEN full-length enriched library, clone:C920021J23 product:general transcription factor II A, 2, full insert sequence.			2.34862	3.20295	2.77578
chr14	Q8BMD5-2	NM_001168538	Cdadc1	cytidine and dCMP deaminase domain-containing protein 1 isoform 5	Cdadc1	cytidine and dCMP deaminase domain-containing	2.61487		2.93254		2.7737
chr5	Q9WU42	NM_011424	Ncor2	nuclear receptor corepressor 2 isoform 1	Ncor2	nuclear receptor corepressor 2	2.66153		2.88484		2.77318
chr12	P50220	NM_001146198	n/a	n/a	Nkx2-1	homeobox protein Nkx-2.1	3.42574	2.62511	2.26856		2.77314
chr9	B7ZMP6	NM_011643	Trpc1	short transient receptor potential channel 1 isoform 1	Trpc1	SubName: Full=Transient receptor potential cation channel, subfamily C, member 1, isoform CRA_d; SubName: Full=Trpc1 protein;	2.60465		3.24326	2.46019	2.76937
chr10	B2RY46	NM_010690	Lats1	serine/threonine-protein kinase LATS1	Lats1	serine/threonine-protein kinase LATS1	2.27278		2.54657	3.48371	2.76769
chr12	Q6NV72	NM_001170858	Wdcp	WD repeat and coiled-coil-containing protein isoform 1	BC068281	WD repeat-containing protein C2orf44 homolog	3.11125			2.42046	2.76586
chr15	O35484	NM_001102458	Azin1	antizyme inhibitor 1 isoform 1	Azin1	antizyme inhibitor 1		3.01289	2.50516		2.75903
chr11	P08043	NM_001044697	Zfp2	zinc finger protein 2	Zfp2	zinc finger protein 2	2.34862			3.1678	2.75821
chr19		n/a	n/a	n/a	n/a	Mus musculus 18-day embryo whole body cDNA, RIKEN full-length enriched library, clone:1190008K20 product:hypothetical protein, full insert sequence.	2.44015	4.1095	2.17714	2.30345	2.75756
chr2	A2A4U9	NM_054055	Slc13a3	solute carrier family 13 member 3	Slc13a3	solute carrier family 13 member 3		3.09685		2.41804	2.75744
chr2		NM_013720	Mga	MAX gene-associated protein isoform 1	Mga	Mus musculus MGA protein mRNA, complete cds.	2.49524	3.01594			2.75559
chr11	NP_620400	NM_138950	Wdr81	WD repeat-containing protein 81	Wdr81	WD repeat-containing protein 81	2.62017	2.88944			2.75481
chr19	Q8JZT6	NM_001164100	Add3	gamma-adducin isoform b	Add3	gamma-adducin isoform a	2.61355			2.88154	2.74755
chr9	D3YX51	NM_175235	Celf6	CUGBP Elav-like family member 6 isoform 1	Celf6	CUGBP Elav-like family member 6	3.20096	2.29137			2.74616
chr9	Q4VA61	NM_001081270	Dscaml1	Down syndrome cell adhesion molecule-like protein 1 homolog	Dscaml1	RecName: Full=Down syndrome cell adhesion molecule-like protein 1 homolog; Flags: Precursor;	3.03691		2.44132		2.73911
chr6	NP_001177390	NM_001190461	Hilpda	hypoxia-inducible lipid droplet-associated protein isoform 1	2310016C08Rik	hypoxia-inducible gene 2 protein isoform 1		3.16902		2.30918	2.7391
chr7	Q9Z188-3	NM_001037957	Dyrk1b	dual specificity tyrosine-phosphorylation-regulated kinase 1B isoform p69	Dyrk1b	dual specificity	2.56528	2.90918			2.73723
chr1	Q543F8	NM_008765	Orc2	origin recognition complex subunit 2 isoform A	Orc2	origin recognition complex subunit 2 isoform A			2.40504	3.06877	2.73691
chr14	Q8BG19-3	NM_028651	Tmtc4	transmembrane and TPR repeat-containing protein 4	Tmtc4	transmembrane and TPR repeat-containing protein		3.01549	2.45509		2.73529
chr9	O88623-3	NM_198092	Usp2	ubiquitin carboxyl-terminal hydrolase 2 isoform Usp2-69	Usp2	ubiquitin carboxyl-terminal hydrolase 2 isoform	2.74426			2.72311	2.73369
chr4	Q3TBP7	NM_153403	Ago1	protein argonaute-1 isoform 1	Eif2c1	SubName: Full=Eukaryotic translation initiation factor 2C, 3; SubName: Full=MCG141181, isoform CRA_a; SubName: Full=Putative uncharacterized protein;		2.6135	2.84486		2.72918
chr18	Q3TAQ9	NM_001110015	Wdr36	WD repeat-containing protein 36 isoform 1	Wdr36	WD repeat domain 36 isoform 1	3.33186			2.12434	2.7281
chr7	Q9QWW1	NM_011983	Homer2	homer protein homolog 2 isoform 1	Homer2	homer protein homolog 2 isoform 1	2.67969	2.77372			2.7267
chr11	Q6PDS3-4	NM_001168521	Sarm1	sterile alpha and TIR motif-containing protein 1 isoform 1	Sarm1	RecName: Full=Sterile alpha and TIR motif-containing protein 1; AltName: Full=Tir-1 homolog;		2.18355	3.2678		2.72567
chr14	B7ZMX9	NM_010932	Pnoc	prepronociceptin isoform 1 preproprotein	Pnoc	nociceptin precursor	2.50467			2.94593	2.7253
chr1	Q8C3V4	NM_009283	Stat1	signal transducer and activator of transcription 1 isoform 2	Stat1	signal transducer and activator of transcription		3.48387	2.60645	2.07187	2.72073
chr19		NM_027877	Mus81	crossover junction endonuclease MUS81	Mus81	crossover junction endonuclease MUS81	2.23869	3.60372	2.31499		2.71913
chr12		NM_133364	Prima1	proline-rich membrane anchor 1 precursor	Prima1	Mus musculus adult male corpora quadrigemina cDNA, RIKEN full-length enriched library, clone:B230212M13 product:weakly similar to ACETYLCHOLINESTERASE MEMBRANE ANCHOR PRECURSOR [Mus musculus], full insert sequence.	2.33623	3.10114			2.71868
chr19	NP_001104610	NM_001111140	Lrrc10b	leucine-rich repeat-containing protein 10B	Lrrc10b	LRRC10-like protein ENSP00000367315	2.30172		3.12886		2.71529
chr2	Q05CI8	NM_172404	Kyat1	kynurenine--oxoglutarate transaminase 1	Ccbl1	kynurenine--oxoglutarate transaminase 1	2.25658	3.17095			2.71376
chr9	Q810B3	NM_178245	Bsx	brain-specific homeobox protein homolog	Bsx	brain-specific homeobox protein homolog	3.39255	2.03145			2.712
chr4	NP_081175	NM_026899	Ssu72	RNA polymerase II subunit A C-terminal domain phosphatase SSU72	Ssu72	RNA polymerase II subunit A C-terminal domain		2.53234		2.88604	2.70919
chr7		NM_177226	Zfp629	zinc finger protein 629	Zfp629	Mus musculus 13 days embryo forelimb cDNA, RIKEN full-length enriched library, clone:5930419A17 product:KIAA0326 PROTEIN (FRAGMENT) homolog [Homo sapiens], full insert sequence.	2.95144	2.46391			2.70768
chr2	A1Z2X8	NM_016902	Nphp1	nephrocystin-1 isoform a	Nphp1	SubName: Full=Nephrocystin 1 variant 2;	2.968	2.54457		2.60926	2.70728
chr1		NM_026241	Ankrd39	ankyrin repeat domain-containing protein 39 isoform 1	Ankrd39	Mus musculus adult male cecum cDNA, RIKEN full-length enriched library, clone:9130416N05 product:hypothetical Ankyrin repeat profile/Ankyrin-repeat/Ankyrin repeat region circular profile/Yeast DNA-binding domain containing protein, full insert sequence.			3.02183	2.38445	2.70314
chr7	Q3UL40	NM_206856	Tacc2	transforming acidic coiled-coil-containing protein 2 isoform a	Tacc2	transforming acidic coiled-coil-containing		3.22526		2.17245	2.69886
chr9	Q6YND2	NM_177318	Zfp653	zinc finger protein 653 isoform 2	Zfp653	zinc finger protein 653			2.45093	2.94581	2.69837
chr8	Q8BGF6	NM_178736	Elmod2	ELMO domain-containing protein 2	Elmod2	ELMO domain-containing protein 2			2.8564	2.53567	2.69604
chr4	A6PWD2-5	NM_177868	Fhad1	forkhead-associated domain-containing protein 1	Fhad1	RecName: Full=Forkhead-associated domain-containing protein 1; Short=FHA domain-containing protein 1;	3.20113		2.18688		2.694
chr7	D3YVJ1	NM_001195727	Gm5901	uncharacterized protein C11orf42 homolog isoform 1	Gm5901	predicted gene 5901	2.53665	2.84801			2.69233
chr14	B8JKK3	NM_023526	Nkiras1	NF-kappa-B inhibitor-interacting Ras-like protein 1 isoform 1	Nkiras1	NF-kappa-B inhibitor-interacting Ras-like	2.21016	3.17256			2.69136
chr6	Q8CAE1	n/a	n/a	n/a	A230083G16Rik	SubName: Full=Putative uncharacterized protein; SubName: Full=RIKEN cDNA A230083G16;		3.17651	2.54039	2.34701	2.68797
chr11	Q61635	NM_008330	Ifi47	interferon gamma inducible protein 47	Ifi47	interferon gamma inducible protein 47		3.20617	2.16617		2.68617
chr2	Q80V29	NM_027129	Ap5s1	AP-5 complex subunit sigma-1 isoform a	2310035K24Rik	hypothetical protein LOC69596	2.8263			2.54182	2.68406
chr15	Q8C7U7	NM_001161768	Galnt6	polypeptide N-acetylgalactosaminyltransferase 6	Galnt6	polypeptide N-acetylgalactosaminyltransferase 6	2.22364	2.92532	2.70658	2.84999	2.67638
chr8	Q8BMQ8	NM_001048143	Mon1b	vacuolar fusion protein MON1 homolog B	Mon1b	vacuolar fusion protein MON1 homolog B	3.49457	2.50359	2.0231		2.67375
chr2	NP_062732	NM_019758	Mtch2	mitochondrial carrier homolog 2 isoform 1	Mtch2	mitochondrial carrier homolog 2		2.79463		2.54607	2.67035
chr8		NM_001172152	Wdr17	WD repeat-containing protein 17 isoform 2	Wdr17	Mus musculus adult retina cDNA, RIKEN full-length enriched library, clone:A930002M15 product:hypothetical G-protein beta WD-40 repeats containing protein, full insert sequence.	3.30186	2.28147		2.42327	2.66887
chr3	Q8CGF1	NM_172525	Arhgap29	rho GTPase-activating protein 29	Arhgap29	rho GTPase-activating protein 29	2.09469	3.24255			2.66862
chr6		NR_027875	1810058I24Rik		1810058I24Rik	Mus musculus 18-day embryo whole body cDNA, RIKEN full-length enriched library, clone:1190007C21 product:unclassifiable, full insert sequence.		2.34879	2.09291	3.56046	2.66739
chr19	Q8VDV3	NM_144538	Rab3il1	guanine nucleotide exchange factor for Rab-3A isoform 1	Rab3il1	guanine nucleotide exchange factor for Rab-3A	2.22335	3.10984			2.6666
chr10	Q91V24	NM_013850	Abca7	ATP-binding cassette sub-family A member 7 isoform 2	Abca7	ATP-binding cassette sub-family A member 7	2.15047	3.65206		2.19186	2.6648
chr9	Q91WA1	NM_025372	Tipin	TIMELESS-interacting protein	Tipin	TIMELESS-interacting protein	2.86057		2.46109		2.66083
chr5		NM_001081323	Mphosph9	M-phase phosphoprotein 9 isoform b	Mphosph9	Mus musculus adult male testis cDNA, RIKEN full-length enriched library, clone:4930548D04 product:similar to M-PHASE PHOSPHOPROTEIN 9 (FRAGMENT) [Homo sapiens], full insert sequence.	3.05244	2.29429	2.63064		2.65912
chr2	Q3ULB5	NM_001145854	Pak6	serine/threonine-protein kinase PAK 6	Pak6	serine/threonine-protein kinase PAK 6	2.21822		3.09834		2.65828
chr5	NP_001120828	NM_001127356	Eif2b4	translation initiation factor eIF-2B subunit delta isoform 1	Eif2b4	translation initiation factor eIF-2B subunit			3.20972	2.10587	2.6578
chr5		n/a	n/a	n/a	Gm15446	Mus musculus 10 days lactation, adult female mammary gland cDNA, RIKEN full-length enriched library, clone:D730047O05 product:MSZF33 homolog [Mus musculus], full insert sequence.	2.35004	3.25062	2.37192		2.65753
chr11	A2A6M9	NM_009217	Sstr2	somatostatin receptor type 2 isoform B	Sstr2	somatostatin receptor type 2 isoform B	2.43339		2.87338		2.65339
chr13	D3YZ67	NM_001081348	Hecw1	E3 ubiquitin-protein ligase HECW1	Hecw1	E3 ubiquitin-protein ligase HECW1	2.53247		2.77174		2.6521
chr3	Q9JK48-2	NM_019464	Sh3glb1	endophilin-B1 isoform 2	Sh3glb1	endophilin-B1	2.89616		2.39942		2.64779
chr12		NM_028731	Esyt2	extended synaptotagmin-2	Esyt2	Mus musculus ES cells cDNA, RIKEN full-length enriched library, clone:2410017M09 product:unclassifiable, full insert sequence.	2.58168	2.71038			2.64603
chr4	A6PWD2-2	NM_177868	Fhad1	forkhead-associated domain-containing protein 1	Fhad1	RecName: Full=Forkhead-associated domain-containing protein 1; Short=FHA domain-containing protein 1;		3.23413	2.05366		2.64389
chr3	NP_034880	NM_010750	Mab21l1	putative nucleotidyltransferase MAB21L1	Mab21l1	protein mab-21-like 1		3.05044	2.23294		2.64169
chr8	Q7TMC8	NM_181666	n/a	n/a	Fuk	L-fucose kinase isoform 1	2.32152		3.44815	2.15416	2.64128
chr10	Q9ESS2	NM_023304	Fgf22	fibroblast growth factor 22 precursor	Fgf22	fibroblast growth factor 22 precursor		3.1948	2.08178		2.63829
chr3		n/a	n/a	n/a	4930570G19Rik	Mus musculus adult male testis cDNA, RIKEN full-length enriched library, clone:4930570G19 product:unclassifiable, full insert sequence.	2.20711	3.06941			2.63826
chr16	Q548L0	NM_011749	Zfp148	zinc finger protein 148	Zfp148	zinc finger protein 148	3.12124	2.69937		2.09189	2.6375
chr7	Q766D5	NM_177897	B4galnt4	N-acetyl-beta-glucosaminyl-glycoprotein 4-beta-N-acetylgalactosaminyltransferase 1	B4galnt4	N-acetyl-beta-glucosaminyl-glycoprotein			2.57779	2.68833	2.63306
chr6	Q6DFW7	NM_001160127	Smyd1	histone-lysine N-methyltransferase Smyd1 isoform 1	Smyd1	SET and MYND domain-containing protein 1 isoform	2.30778	2.95605			2.63192
chr2	Q7TQ95	NM_027133	Lnpk	protein lunapark isoform a	Lnp	RecName: Full=Protein lunapark; AltName: Full=Protein ulnaless;			2.96784	2.29262	2.63023
chr6	Q3UWM4	NM_001033430	Kdm7a	lysine-specific demethylase 7A	Jhdm1d	RecName: Full=Lysine-specific demethylase 7; EC=1.14.11.-; AltName: Full=JmjC domain-containing histone demethylation protein 1D;	3.09401		2.1645		2.62925
chr2	Q56A13	NM_133850	Commd7	COMM domain-containing protein 7 isoform 1	Commd7	COMM domain-containing protein 7 isoform 1	2.71487	2.54361			2.62924
chr12	D3YW01	NM_001081423	Ttll5	tubulin polyglutamylase TTLL5 isoform 1	Ttll5	tubulin polyglutamylase TTLL5		2.75938		2.49838	2.62888
chr3	Q9CX98	NM_027816	Cyp2u1	cytochrome P450 2U1	Cyp2u1	cytochrome P450 2U1		2.17264		3.08431	2.62847
chr16	Q543R9	NM_001173505	Thpo	thrombopoietin isoform 1 precursor	Thpo	thrombopoietin precursor	2.45636	2.61256	2.81609		2.62834
chr2		NM_175238	Rif1	telomere-associated protein RIF1	Rif1	Mus musculus 8 days embryo whole body cDNA, RIKEN full-length enriched library, clone:5730435J01 product:hypothetical Serine-rich region containing protein, full insert sequence.		2.66401	2.59019		2.6271
chr13	Q8CFN5-3	NM_001170537	Mef2c	myocyte-specific enhancer factor 2C isoform 1	Mef2c	myocyte-specific enhancer factor 2C isoform 2	2.95252			2.2961	2.62431
chr2	B7ZCN4	NM_177217	Cep250	centrosome-associated protein CEP250 isoform 1	Cep250	SubName: Full=Centrosomal protein 250; Flags: Fragment;		2.07094	2.92568	2.8725	2.62304
chr9	A0ELI5	NM_153799	Edc3	enhancer of mRNA-decapping protein 3	Edc3	SubName: Full=Putative uncharacterized protein;	2.68785		2.55275		2.6203
chr1	D3Z7I3	NM_011439	Sox13	transcription factor SOX-13	Sox13	SubName: Full=Putative uncharacterized protein Sox13; SubName: Full=SRY-box containing gene 13, isoform CRA_b;	2.44134	2.90629		2.5099	2.61918
chr6	Q6NXZ1	NM_133922	Krba1	protein KRBA1 isoform 2	Krba1	protein KRBA1		2.21585	2.72272	2.91102	2.61653
chr12	NP_001165575	NM_001172104	Zbtb25	zinc finger and BTB domain-containing protein 25	Zbtb25	zinc finger and BTB domain containing 25			2.11904	3.10785	2.61345
chr11	Q3UR83	NM_153288	Npb	neuropeptide B isoform 1 precursor	Npb	neuropeptide B precursor	2.9259	2.29953	2.61066		2.61203
chr15		NM_175009	Eny2	transcription and mRNA export factor ENY2	Eny2	Mus musculus e(y)2 homolog mRNA, complete cds.	3.07771		2.53046	2.21822	2.6088
chr19	B9EHG7	NM_018830	Asah2	neutral ceramidase	Asah2	neutral ceramidase		2.12916	3.08593		2.60755
chr2	A2AKX0	NM_133501	Ntng2	netrin-G2 isoform b precursor	Ntng2	netrin-G2 isoform b	2.67687		2.53658		2.60672
chr7	Q8BG98	NM_177001	9130023H24Rik	GLI-Kruppel family member GLI4	9130023H24Rik	hypothetical protein LOC319792		2.67332	2.52889		2.60111
chr10		NM_133964	Dohh	deoxyhypusine hydroxylase	Dohh	deoxyhypusine hydroxylase		2.60572	2.9225	2.27035	2.59952
chr1	B2RQ57	NM_001136104	Abl2	Abelson tyrosine-protein kinase 2 isoform a	Abl2	tyrosine-protein kinase ABL2 isoform a	2.13278	2.96313	2.69219		2.59603
chr8	B2RXC1	NM_177240	Trappc11	trafficking protein particle complex subunit 11	D030016E14Rik	RecName: Full=UPF0636 protein C4orf41 homolog;	2.57382		2.61675		2.59529
chr15	Q923M0	NM_033371	Ppp1r16a	protein phosphatase 1 regulatory subunit 16A	Ppp1r16a	RecName: Full=Protein phosphatase 1 regulatory subunit 16A; AltName: Full=Myosin phosphatase targeting subunit 3; Flags: Precursor;			2.83866	2.35145	2.59505
chr5	Q99NI3	NM_053266	Gtf2ird2	general transcription factor II-I repeat domain-containing protein 2	Gtf2ird2	general transcription factor II-I repeat		3.13535	2.05227		2.59381
chr5	Q8VIB5	NM_001005477	Barhl2	barH-like 2 homeobox protein	Barhl2	barH-like 2 homeobox protein	2.40142		2.78482		2.59312
chr12	B2RW07	NM_001033436	Atxn7l1	ataxin-7-like protein 1 isoform 1	Atxn7l1	ataxin-7-like protein 1 isoform 1		2.83005	2.34826		2.58915
chr15	Q8BGT6-2	NM_177461	Micall1	MICAL-like protein 1	Micall1	MICAL-like protein 1	2.48712	2.68843			2.58777
chr13	Q8CGC9	NM_010829	Msh3	DNA mismatch repair protein Msh3 isoform 1	Msh3	SubName: Full=Msh3 protein;	2.33507	3.0122	2.41052		2.58593
chr5	Q5U221	NM_028291	Pan3	PAB-dependent poly(A)-specific ribonuclease subunit PAN3	Pan3	PAB-dependent poly(A)-specific ribonuclease			2.94576	2.21742	2.58159
chr12	NP_666146	NM_146034	Mia2	cTAGE family member 5 isoform 3	Ctage5	cutaneous T-cell lymphoma-associated antigen 5			2.36734	2.79553	2.58143
chr7	Q8BTU7	NM_173445	Rccd1	RCC1 domain-containing protein 1	Rccd1	RCC1 domain-containing protein 1		2.48049	2.81543	2.44824	2.58139
chr10	Q53Z05	NM_019812	Sirt1	NAD-dependent protein deacetylase sirtuin-1 isoform 1	Sirt1	NAD-dependent deacetylase sirtuin-1 isoform 1	2.97474		2.18045		2.5776
chr7		NM_028120	Cep89	centrosomal protein of 89 kDa	Ccdc123	Mus musculus 10 days embryo whole body cDNA, RIKEN full-length enriched library, clone:2610507L03 product:similar to CDNA FLJ14640 FIS, CLONE NT2RP2001460, WEAKLY SIMILAR TO TRICHOHYALIN [Homo sapiens], full insert sequence.		2.88931		2.26377	2.57654
chr5		NM_001003909	Ankib1	ankyrin repeat and IBR domain-containing protein 1 isoform 2	Ankib1	Mus musculus adult male tongue cDNA, RIKEN full-length enriched library, clone:2310061P20 product:unclassifiable, full insert sequence.	2.50007		2.65208		2.57608
chr6	Q9D0W0	NM_026849	Mtmr14	myotubularin-related protein 14	Mtmr14	myotubularin-related protein 14	2.34574	2.43913	2.94018		2.57502
chr8	Q810A5	NM_028888	4931428F04Rik	uncharacterized protein KIAA0895-like	4931428F04Rik	hypothetical protein LOC74356	2.68601		2.46074		2.57337
chr2		n/a	n/a	n/a	n/a	Mus musculus 11 days embryo whole body cDNA, RIKEN full-length enriched library, clone:2700079J08 product:unclassifiable, full insert sequence.		2.61563		2.52819	2.57191
chr9	Q8R2Y2-2	NM_023061	Mcam	cell surface glycoprotein MUC18 precursor	Mcam	RecName: Full=Cell surface glycoprotein MUC18; AltName: Full=Gicerin; AltName: Full=Melanoma cell adhesion molecule; AltName: Full=Melanoma-associated antigen MUC18; AltName: CD_antigen=CD146; Flags: Precursor;			2.86769	2.27513	2.57141
chr8	Q8BYH8-2	NM_177224	Chd9	chromodomain-helicase-DNA-binding protein 9 isoform 2	Chd9	chromodomain-helicase-DNA-binding protein 9	2.62901	2.51153			2.57027
chr15	Q3U6N9-3	NM_054099	1110038F14Rik	UPF0488 protein C8orf33 homolog isoform 2	1110038F14Rik	hypothetical protein LOC117171	3.00633		2.13175		2.56904
chr11	A2AB61	NM_001077698	Fmnl1	formin-like protein 1 isoform 2	Fmnl1	formin-like protein 1 isoform 2	2.8172			2.31947	2.56834
chr10	Q8CAM5	NM_029781	Rab36	ras-related protein Rab-36	Rab36	ras-related protein Rab-36		2.25692	2.87306		2.56499
chr9	Q8CC70	NM_199017	9230110C19Rik	uncharacterized protein C11orf70 homolog	9230110C19Rik	hypothetical protein LOC234912	2.64561		2.48033		2.56297
chr18	Q5DTY9	NM_026135	Kctd16	BTB/POZ domain-containing protein KCTD16	Kctd16	BTB/POZ domain-containing protein KCTD16	2.67148	2.44848			2.55998
chr10	Q3V384	NM_145743	Afg1l	AFG1-like ATPase	Lace1	lactation elevated protein 1	2.1266	2.99248			2.55954
chr2	Q3TNY4	NM_172663	Epc2	enhancer of polycomb homolog 2	Epc2	enhancer of polycomb homolog 2		2.74908	2.36063		2.55485
chr11	B1AR02	NM_001163307	Pcgf2	polycomb group RING finger protein 2	Pcgf2	polycomb group RING finger protein 2		2.9183	2.18496		2.55163
chr19	Q6P1H1	NM_201351	Cyb561a3	cytochrome b ascorbate-dependent protein 3 isoform 1	Cybasc3	cytochrome b ascorbate-dependent protein 3	2.42789	2.79498		2.42927	2.55071
chr5	Q3UHD3-3	NM_029920	Mtus2	microtubule-associated tumor suppressor candidate 2 homolog	Mtus2	RecName: Full=Microtubule-associated tumor suppressor candidate 2 homolog; AltName: Full=Cardiac zipper protein; AltName: Full=Microtubule plus-end tracking protein TIP150; Short=Tracking protein of 150 kDa;	2.5304		2.57082		2.55061
chr12		NM_029444	4930447C04Rik	protein SIX6OS1	4930447C04Rik	Mus musculus adult male testis cDNA, RIKEN full-length enriched library, clone:4921504I02 product:RIKEN cDNA 4921504I02 gene, full insert sequence.		2.96261	2.13709		2.54985
chr9	NP_082559	NM_028283	Uaca	uveal autoantigen with coiled-coil domains and ankyrin repeats	Uaca	uveal autoantigen with coiled-coil domains and		3.07192		2.02395	2.54793
chr7	B2RX29	NM_001033205	Zfp575	zinc finger protein 575	Zfp575	zinc finger protein 575	2.53183	2.56306			2.54744
chr8	Q7TNU7	NM_173012	Letm2	LETM1 domain-containing protein LETM2, mitochondrial precursor	Letm2	LETM1 domain-containing protein LETM2,		3.01805		2.07409	2.54607
chr5	Q640Q5-4	NM_028291	Pan3	PAB-dependent poly(A)-specific ribonuclease subunit PAN3	Pan3	PAB-dependent poly(A)-specific ribonuclease	2.9729		2.11905		2.54598
chr11	Q8JZP9-2	NM_144560	Gas2l1	GAS2-like protein 1 isoform beta	Gas2l1	GAS2-like protein 1 isoform alpha		2.08924		2.99963	2.54444
chr9	P46938	NM_001171147	Yap1	transcriptional coactivator YAP1 isoform 1	Yap1	yorkie homolog isoform 1		2.28528	2.80201		2.54365
chr9	NP_001074685	NM_001081216	Phip	PH-interacting protein	Phip	PH-interacting protein	2.27272	2.80515			2.53893
chr3	NP_080501	NM_026225	Cog6	conserved oligomeric Golgi complex subunit 6	Cog6	conserved oligomeric Golgi complex subunit 6	2.79787	2.57961	2.68144	2.09341	2.53808
chr7	Q0PD24	NM_029494	Rab30	ras-related protein Rab-30	Rab30	ras-related protein Rab-30	2.55941			2.51652	2.53796
chr9	Q8BHI4	NM_001164574	Kbtbd3	kelch repeat and BTB domain-containing protein 3	Kbtbd3	kelch repeat and BTB domain-containing protein		2.74102	2.33335		2.53719
chr2	A2AS71	NM_007869	Dnajc1	dnaJ homolog subfamily C member 1 precursor	Dnajc1	dnaJ homolog subfamily C member 1 precursor	2.31434	2.78652	2.50096	2.53218	2.5335
chr5	Q02395-2	NM_013827	Mtf2	metal-response element-binding transcription factor 2 isoform 1	Mtf2	RecName: Full=Metal-response element-binding transcription factor 2; AltName: Full=Metal regulatory transcription factor 2; AltName: Full=Metal-response element DNA-binding protein M96; AltName: Full=Polycomb-like protein 2; Short=mPCl2; AltName: Full=Zinc-regulated factor 1; Short=ZiRF1;		2.15969	2.90604		2.53287
chr9	Q3UZZ3	NM_019987	Ick	serine/threonine-protein kinase ICK	Ick	serine/threonine-protein kinase ICK	2.02237	2.63474		2.94121	2.53277
chr5		n/a	n/a	n/a	1810059H22Rik	Mus musculus 10 day old male pancreas cDNA, RIKEN full-length enriched library, clone:1810059H22 product:unclassifiable, full insert sequence.	2.6794		2.38578		2.53259
chr17	NP_001157291	NM_001163819	Fance	Fanconi anemia group E protein isoform 1	Fance	Fanconi anemia, complementation group E isoform		2.97385	2.30008	2.30262	2.52552
chr7	Q9D1P2-2	NM_026370	Kat8	histone acetyltransferase KAT8	Myst1	probable histone acetyltransferase MYST1	2.26885		2.91317	2.39363	2.52522
chr2	A2AU34	NM_001160363	Tmem74b	transmembrane protein 74B	5430405G05Rik	hypothetical protein LOC108832	2.55838	2.103	2.91193		2.52444
chr8		NM_020046	Dhodh	dihydroorotate dehydrogenase (quinone), mitochondrial precursor	Dhodh	Mus musculus dihydroorotate dehydrogenase mRNA, complete cds; nuclear gene for mitochondrial product.	3.00503	2.03712			2.52107
chr4	Q5DTM8	NM_001163263	Rnf20	E3 ubiquitin-protein ligase BRE1A	Rnf20	E3 ubiquitin-protein ligase BRE1A	2.89781		2.14369		2.52075
chr17	NP_001155195	NM_001161723	Tfeb	transcription factor EB isoform b	Tcfeb	transcription factor EB isoform b	2.18213			2.8592	2.52067
chr19	Q1RLL2	NM_011262	Dpf2	zinc finger protein ubi-d4 isoform 2	Dpf2	zinc finger protein ubi-d4			2.63846	2.402	2.52023
chr2	Q0VGZ5	NM_008523	Ltk	leukocyte tyrosine kinase receptor isoform A	Ltk	leukocyte tyrosine kinase receptor isoform A		2.24716	2.79246		2.51981
chr19	Q3U309	NM_019424	Hps1	Hermansky-Pudlak syndrome 1 protein homolog isoform 1	Hps1	Hermansky-Pudlak syndrome 1 protein homolog			2.86921	2.16755	2.51838
chr8		NM_010926	Emc8	ER membrane protein complex subunit 8	Cox4nb	Mus musculus hypothetical protein COX4AL (COX4AL) mRNA, complete cds.	2.11878		2.90696		2.51287
chr15	Q8CBH7	NM_177597	42805	E3 ubiquitin-protein ligase MARCH11 isoform 1	2021-03-12	E3 ubiquitin-protein ligase MARCH11			2.01041	3.01423	2.51232
chr14	Q3URD3	NM_032008	Slmap	sarcolemmal membrane-associated protein isoform 2	Slmap	sarcolemmal membrane-associated protein	2.38707	2.7031	2.44359		2.51125
chr10		NM_013850	Abca7	ATP-binding cassette sub-family A member 7 isoform 2	Abca7	Mus musculus ATP-binding cassette protein (Abca7) mRNA, partial cds.	2.06232		2.9576		2.50996
chr14		NM_019637	Styx	serine/threonine/tyrosine-interacting protein	Styx	Mus musculus adult male kidney cDNA, RIKEN full-length enriched library, clone:0610039A20 product:phosphoserine/threonine/tyrosine interaction protein, full insert sequence.		2.40381	2.60723		2.50552
chr9		NM_001146059	Als2cl	ALS2 C-terminal-like protein	Als2cl	Mus musculus Als2cl mRNA for Als2 C-terminal like, complete cds.		2.33167		2.67559	2.50363
chr11	Q5F271	NM_019549	Plek	pleckstrin	Plek	pleckstrin	2.39069	2.61616			2.50343
chr4	A2A7E7	NM_019563	Cited4	cbp/p300-interacting transactivator 4	Cited4	cbp/p300-interacting transactivator 4	2.52195	2.48093			2.50144
chr1	B1AQR9	NM_153539	Brinp3	BMP/retinoic acid-inducible neural-specific protein 3 precursor	Fam5c	family with sequence similarity 5, member C		2.99225	2.00604		2.49914
chr4	Q3UW64	NM_015828	Gne	bifunctional UDP-N-acetylglucosamine 2-epimerase/N-acetylmannosamine kinase isoform 2	Gne	bifunctional UDP-N-acetylglucosamine		2.16371	2.82997		2.49684
chr12	Q6VGS5	NM_026681	Ccdc88c	protein Daple	Ccdc88c	protein Daple			2.93246	2.05007	2.49126
chr11		NM_025414	Myo19	unconventional myosin-XIX	Myo19	Mus musculus adult male cecum cDNA, RIKEN full-length enriched library, clone:9130011J09 product:hypothetical IQ calmodulin-binding motif containing protein, full insert sequence.	2.28941	2.69283			2.49112
chr8		n/a	n/a	n/a	n/a	Mus musculus adult male testis cDNA, RIKEN full-length enriched library, clone:4930484A08 product:unclassifiable, full insert sequence.	2.56787			2.40684	2.48735
chr3	Q99K10	NM_138666	Nlgn1	neuroligin-1 isoform 1 precursor	Nlgn1	neuroligin-1 isoform 1	2.5746	2.3999			2.48725
chr5	Q3ULM6-3	NM_001115151	Uspl1	SUMO-specific isopeptidase USPL1 isoform D	Uspl1	ubiquitin-specific peptidase-like protein 1	2.79347		2.17531		2.48439
chr5	Q8BY07	NM_024479	Mettl27	Williams-Beuren syndrome chromosomal region 27 protein isoform 1	Wbscr27	SubName: Full=Putative uncharacterized protein; SubName: Full=Williams-Beuren syndrome critical region protein 27 isoform gamma;	2.6225		2.34517		2.48384
chr18	NP_001177302	NM_001190373	Kcng2	potassium voltage-gated channel subfamily G member 2	Kcng2	potassium voltage-gated channel subfamily G	2.76581		2.20131		2.48356
chrX	Q8C065	NM_183318	n/a	n/a	Rgag4	retrotransposon gag domain-containing protein 4	2.06568	3.1467	2.23338		2.48192
chr5	Q4FK30	NM_016741	Scarb1	scavenger receptor class B member 1 isoform 1	Scarb1	scavenger receptor class B member 1		2.68015	2.28211		2.48113
chr13	D3Z4I3	NM_001081425	Rbm24	RNA-binding protein 24	Rbm24	RNA-binding protein 24	2.81099	2.14798			2.47948
chr3		NM_009210	Hltf	helicase-like transcription factor	Hltf	Mus musculus cDNA pooled tissues:(tissue_type=brain,dev_stage=8-12 days neonate,strain=BALB/c),(tissue_type=testis,dev_stage=adult, strain=C57BL/6J), clone:V01Y037E15.		2.83337	2.23151	2.37154	2.47881
chr5	Q149A0	NM_016912	Cdkl2	cyclin-dependent kinase-like 2 isoform 1	Cdkl2	cyclin-dependent kinase-like 2 isoform 1	2.30446		2.65051		2.47749
chr9	NP_001106754	NM_001113283	Fam214a	protein FAM214A isoform 1	BC031353	hypothetical protein LOC235493 isoform 1	2.51725			2.43415	2.4757
chr8	Q543X5	NM_011135	Cnot7	CCR4-NOT transcription complex subunit 7 isoform 1	Cnot7	CCR4-NOT transcription complex subunit 7	2.29911	2.64622			2.47267
chr17	NP_898909	NM_183086	Mrps10	28S ribosomal protein S10, mitochondrial isoform 3	Mrps10	28S ribosomal protein S10, mitochondrial isoform			2.87042	2.07354	2.47198
chr1	Q8BZJ8-2	NM_001160370	A830018L16Rik	uncharacterized protein C8orf34 homolog isoform 3	A830018L16Rik	hypothetical protein LOC320492 isoform 3	2.28187	2.65884			2.47036
chr6		n/a	n/a	n/a	n/a	Mus musculus adult male testis cDNA, RIKEN full-length enriched library, clone:1700021L22 product:unclassifiable, full insert sequence.	2.2154	2.72297			2.46918
chr19	Q3UE96	NM_001164480	Sipa1	signal-induced proliferation-associated protein 1	Sipa1	signal-induced proliferation-associated protein			2.08198	2.85345	2.46772
chr16	NP_001003971	NM_001003971	n/a	n/a	Senp7	sentrin-specific protease 7 isoform 2	2.02679		2.9059		2.46635
chr2	Q6DI86-3	NM_177244	Fastkd1	FAST kinase domain-containing protein 1, mitochondrial	Fastkd1	FAST kinase domain-containing protein 1	2.05882			2.87243	2.46563
chr9	Q8VDR9	NM_177030	Dock6	dedicator of cytokinesis protein 6	Dock6	dedicator of cytokinesis protein 6			2.92232	2.00314	2.46273
chr9	Q3TQB2	NM_172291	Foxred1	FAD-dependent oxidoreductase domain-containing protein 1 isoform 1	Foxred1	RecName: Full=FAD-dependent oxidoreductase domain-containing protein 1;			2.75297	2.1716	2.46229
chr18	Q8R2U0-2	NM_028112	Seh1l	nucleoporin SEH1 isoform b	Seh1l	nucleoporin SEH1 isoform b	2.11908		2.80464		2.46186
chr9	NP_001122073	NM_001128601	Mthfsl	5, 10-methenyltetrahydrofolate synthetase-like	Gm2382	5, 10-methenyltetrahydrofolate synthetase-like	2.6181	2.55022		2.21633	2.46155
chr18	Q497T7	NM_175751	Zfp608	zinc finger protein 608	Zfp608	SubName: Full=Zfp608 protein; Flags: Fragment;	2.06846			2.84517	2.45681
chr17	Q6P5D3-3	NM_001163759	Dhx57	putative ATP-dependent RNA helicase DHX57 isoform 1	Dhx57	putative ATP-dependent RNA helicase DHX57		2.86757	2.04328		2.45542
chr4	Q9CXP9	NM_028457	Exo5	exonuclease V	Dem1	defects in morphology protein 1 homolog	2.7303			2.1779	2.4541
chr3	Q6KAQ7-3	NM_198416	n/a	n/a	Zzz3	ZZ-type zinc finger-containing protein 3	2.31037		2.59078		2.45057
chr3	Q3TX21	NM_010516	Cyr61	protein CYR61 precursor	Cyr61	protein CYR61 precursor	2.84707		2.05302		2.45005
chr3	Q6NVF2	NM_001164056	Pld1	phospholipase D1	Pld1	phospholipase D1			2.24051	2.65478	2.44765
chr6	Q9QY81	NM_018815	Nup210	nuclear pore membrane glycoprotein 210 precursor	Nup210	nuclear pore membrane glycoprotein 210		2.25666	2.63763		2.44714
chr4	Q9QZN4	NM_001163707	Fbxo6	F-box only protein 6	Fbxo6	F-box only protein 6	2.39642	2.91438		2.02716	2.44599
chr12	Q9QYC1	NM_018814	Pcnx	pecanex-like protein 1	Pcnx	RecName: Full=Pecanex-like protein 1; AltName: Full=Pecanex homolog;	2.34827	2.95988		2.02395	2.44403
chr9	B7ZWL5	NM_183276	Nbeal2	neurobeachin-like protein 2	Nbeal2	neurobeachin-like protein 2		2.56612	2.31332		2.43972
chr13	NP_848141	NM_178364	Zfp369	neurotrophin receptor-interacting factor 2	Zfp369	zinc finger protein 369	2.18686	2.69014			2.4385
chr8	Q8BGV4	NM_001112729	n/a	n/a	BC019943	hypothetical protein LOC234138 isoform a		2.3345	2.53765		2.43607
chr2		n/a	n/a	n/a	Gm14462	Mus musculus 7 days embryo whole body cDNA, RIKEN full-length enriched library, clone:C430010C01 product:inferred: GLUT4 enhancer factor {Homo sapiens}, full insert sequence.			2.48573	2.38627	2.436
chr2	Q52KJ2	NM_010054	Dlx2	homeobox protein DLX-2	Dlx2	homeobox protein DLX-2	2.76366		2.106		2.43483
chr4	A2AJP4	NM_198957	Rbm12b2	RNA-binding protein 12B-B	C430048L16Rik	RNA-binding protein 12B-B	2.53616		2.33039		2.43328
chr1	Q64735	NM_013499	Cr1l	complement component receptor 1-like protein	Cr1l	RecName: Full=Complement regulatory protein Crry; AltName: Full=Protein p65; Flags: Precursor;	2.68934			2.17478	2.43206
chr16	B8ZXI1	NM_029128	Qtrt2	queuine tRNA-ribosyltransferase accessory subunit 2	Qtrtd1	queuine tRNA-ribosyltransferase subunit QTRTD1	2.62945			2.23417	2.43181
chr10	Q8CEI3	NM_144820	Ccdc28a	coiled-coil domain-containing protein 28A isoform 1	Ccdc28a	coiled-coil domain-containing protein 28A		2.82279	2.0382		2.43049
chr7	NP_082159	NM_027883	Dhx34	probable ATP-dependent RNA helicase DHX34	Dhx34	probable ATP-dependent RNA helicase DHX34	2.33347		2.52739		2.43043
chr14	E0CY93	NM_001039676	Slc39a2	zinc transporter ZIP2	Slc39a2	SubName: Full=Putative uncharacterized protein Slc39a2;	2.40005	2.012	2.24293	3.06107	2.42901
chr4	Q8K389	NM_145990	Cdk5rap2	CDK5 regulatory subunit-associated protein 2 isoform 1	Cdk5rap2	RecName: Full=CDK5 regulatory subunit-associated protein 2; AltName: Full=CDK5 activator-binding protein C48;		2.33341	2.51871		2.42606
chr4	Q3UTA6	NM_130881	Pabpc4	polyadenylate-binding protein 4 isoform 1	Pabpc4	polyadenylate-binding protein 4 isoform 1	2.5075		2.34348		2.42549
chr10	Q3UCI5	NM_001080129	Tmpo	lamina-associated polypeptide 2 isoform epsilon	Tmpo	lamina-associated polypeptide 2 isoform epsilon	2.32867	2.52025			2.42446
chr3	Q9D682	NM_028881	Crtc2	CREB-regulated transcription coactivator 2	Crtc2	SubName: Full=Putative uncharacterized protein;		2.7154	2.13112		2.42326
chr5	Q60949	NM_019636	Tbc1d1	TBC1 domain family member 1 isoform 1	Tbc1d1	TBC1 domain family member 1	2.77312	2.38916	2.10523		2.4225
chr10		NR_028262	Rmst		Rmst	Mus musculus 12 days embryo spinal cord cDNA, RIKEN full-length enriched library, clone:C530045D17 product:unclassifiable, full insert sequence.	2.28903	2.45497	2.52279		2.42226
chr7	P10755	NM_178733	Zfp14	zinc finger protein 14	Zfp14	zinc finger protein 14	2.03293		2.80769		2.42031
chr3	Q5DTR2	NM_001037737	Arnt	aryl hydrocarbon receptor nuclear translocator isoform a	Arnt	aryl hydrocarbon receptor nuclear translocator	2.43405	2.40532			2.41969
chr2		NM_024436	Rab22a	ras-related protein Rab-22A	Rab22a	Mus musculus Rab22A mRNA for Rab22A, complete cds.	2.3124			2.50506	2.40873
chr5	Q9Z116	NM_001163797	Zfp68	zinc finger protein 68 isoform a	Zfp68	zinc finger protein 68 isoform a	2.31112		2.50422		2.40767
chr8	Q3UG93	NM_011939	Hsf4	heat shock factor protein 4 isoform 2	Hsf4	SubName: Full=Putative uncharacterized protein;		2.08223	2.89412	2.24564	2.40733
chr10	Q04857	NM_009933	Col6a1	collagen alpha-1(VI) chain precursor	Col6a1	collagen alpha-1(VI) chain precursor	2.06605	2.74586			2.40596
chr13	P16372	NM_001007575	Zfp58	zinc finger protein 58	Zfp58	zinc finger protein 58	2.41956	2.6621	2.12751		2.40306
chr1	P0C5J4	NM_001146330	Gpr52	probable G-protein coupled receptor 52	Rabgap1l	probable G-protein coupled receptor 52	2.22377	2.57727			2.40052
chr11	Q69ZS4	NM_016857	Exoc7	exocyst complex component 7 isoform 1	Exoc7	exocyst complex component 7 isoform 2			2.47182	2.32808	2.39995
chr5	Q8BZ64	NM_001039153	Tctn1	tectonic-1 precursor	Tctn1	tectonic-1 precursor	2.28865	2.80259	2.10412		2.39845
chr10	Q9D306	NM_001162369	Mgat4c	alpha-1,3-mannosyl-glycoprotein 4-beta-N-acetylglucosaminyltransferase C	Mgat4c	alpha-1,3-mannosyl-glycoprotein		2.16021	2.63483		2.39752
chr11	Q8BTK5-2	NM_001102611	Smyd4	SET and MYND domain-containing protein 4	Smyd4	RecName: Full=SET and MYND domain-containing protein 4;	2.17782	2.60685			2.39234
chr14	Q543D4	NM_172812	Htr2a	5-hydroxytryptamine receptor 2A	Htr2a	5-hydroxytryptamine receptor 2A	2.35813	2.42652			2.39233
chr9		NM_172774	Atrip	ATR-interacting protein	Atrip	ATR-interacting protein	2.5935			2.18737	2.39044
chr1	Q3UZA1-2	NM_001038846	Rcsd1	capZ-interacting protein isoform b	Rcsd1	capZ-interacting protein isoform b		2.44243		2.33605	2.38924
chr13	Q3TGU8	NM_025370	Aaed1	thioredoxin-like protein AAED1	1110018J18Rik	hypothetical protein LOC66129		2.71415	2.059		2.38658
chrX	Q3V0C1	NM_175446	Zmat1	zinc finger matrin-type protein 1	Zmat1	zinc finger matrin-type protein 1		2.38132		2.39014	2.38573
chr9	Q9DBR3-3	NM_001166138	Armc8	armadillo repeat-containing protein 8 isoform 2	Armc8	RecName: Full=Armadillo repeat-containing protein 8;	2.09066			2.68022	2.38544
chr10	Q80TN7	NM_001081035	Nav3	neuron navigator 3	Nav3	neuron navigator 3	2.5151	2.24836			2.38173
chr5	Q6ZPL9	NM_026409	Ddx55	ATP-dependent RNA helicase DDX55 isoform 1	Ddx55	RecName: Full=ATP-dependent RNA helicase DDX55; EC=3.6.4.13; AltName: Full=DEAD box protein 55;	2.18159		2.68959	2.27368	2.38162
chr11	Q9WTI7-2	NM_008659	Myo1c	unconventional myosin-Ic isoform b	Myo1c	myosin-Ic isoform b	2.35858		2.40198		2.38028
chr13	Q8CGC9	NM_010829	Msh3	DNA mismatch repair protein Msh3 isoform 1	Msh3	DNA mismatch repair protein Msh3			2.11666	2.64208	2.37937
chr4		n/a	n/a	n/a	n/a	Mus musculus cDNA, clone:Y2G0128I20, strand:unspecified.	2.35554		2.40846	2.37181	2.3786
chr2	Q8BRS9	NM_001077632	Nkx2-2	homeobox protein Nkx-2.2 isoform 2	Nkx2-2	homeobox protein Nkx-2.2 isoform 2	2.72889	2.02266			2.37577
chr6	P97360	NM_007961	Etv6	transcription factor ETV6 isoform 1	Etv6	transcription factor ETV6	2.07956	2.6716			2.37558
chr7	Q6GTK2	NM_009627	Adm	ADM precursor	Adm	ADM precursor	2.52766			2.22021	2.37393
chr16		NM_001033237	Yeats2	YEATS domain-containing protein 2 isoform 2	Yeats2	Mus musculus 14, 17 days embryo head cDNA, RIKEN full-length enriched library, clone:3221404G04 product:hypothetical YEATS family/Glycine-rich region profile containing protein, full insert sequence.		2.7274	2.01932		2.37336
chr10		NM_008635	Map7	ensconsin isoform 1	Mtap7	Mus musculus adult male spinal cord cDNA, RIKEN full-length enriched library, clone:A330048D23 product:unclassifiable, full insert sequence.		2.41751	2.32476		2.37113
chr14		NM_028981	Cacna1d	voltage-dependent L-type calcium channel subunit alpha-1D isoform 1	Cacna1d	Mus musculus mRNA for calcium channel alpha 1D subunit, complete cds.	2.12442		2.61638		2.3704
chr8	Q8BTU1-2	NM_008187	Cfap20	cilia- and flagella-associated protein 20	Gtl3	RecName: Full=UPF0468 protein C16orf80 homolog; AltName: Full=Gene trap locus 3 protein;		2.32736	2.41031		2.36883
chr8	Q3UZ64	NM_010901	Nfatc3	nuclear factor of activated T-cells, cytoplasmic 3	Nfatc3	nuclear factor of activated T-cells, cytoplasmic		2.64618	2.09057		2.36838
chr3	Q8R2K8-2	NM_153513	BC028528	uncharacterized protein C1orf54 homolog isoform 1 precursor	BC028528	hypothetical protein LOC229600 precursor	2.55658	2.61192	2.08956	2.21403	2.36802
chr14	Q7TPB9	NM_001081252	Uggt2	UDP-glucose:glycoprotein glucosyltransferase 2 precursor	Uggt2	SubName: Full=Ugcgl2 protein;	2.50939		2.34766	2.24679	2.36795
chr18	Q8BUA3	NM_001161483	Nol4	nucleolar protein 4 isoform 1	Nol4	nucleolar protein 4 isoform 1	2.30193		2.5795	2.21849	2.36664
chr2	A2AQI2	NM_173749	Pamr1	inactive serine protease PAMR1 precursor	Pamr1	inactive serine protease PAMR1 precursor	2.31875	2.41051			2.36463
chr11	O55187-2	NM_007625	Cbx4	E3 SUMO-protein ligase CBX4	Cbx4	E3 SUMO-protein ligase CBX4		2.67943	2.0491		2.36427
chr10		NR_033208	n/a	n/a	Wibg	Mus musculus mRNA for PYM protein (Pym gene).	2.07434	2.65256			2.36345
chr19	Q99PB1	NM_023781	1700020D05Rik	mage-g2 protein	Snx32	mage-g2 protein			2.13672	2.57916	2.35794
chr2	Q3UJT0	NM_001159641	Tasp1	threonine aspartase 1 isoform b	Tasp1	threonine aspartase 1 isoform b		2.51111		2.20467	2.35789
chr11	Q9Z2Z9	NM_013529	Gfpt2	glutamine--fructose-6-phosphate aminotransferase [isomerizing] 2	Gfpt2	glucosamine--fructose-6-phosphate		2.45435	2.2518		2.35307
chr16	B2RXA0	NM_001081255	Lrch3	leucine-rich repeat and calponin homology domain-containing protein 3 isoform 1 precursor	Lrch3	leucine-rich repeat and calponin homology	2.12945	2.57344			2.35145
chr4	Q8BFZ2	NM_178756	Plppr1	phospholipid phosphatase-related protein type 1	E130309F12Rik	lipid phosphate phosphatase-related protein type	2.62653		2.06042		2.34347
chr3	NP_705789	NM_153561	Nudt6	nucleoside diphosphate-linked moiety X motif 6 isoform 2	Nudt6	nucleoside diphosphate-linked moiety X motif 6			2.11585	2.56875	2.3423
chr11		NM_001109628	Cdk12	cyclin-dependent kinase 12 isoform 2	Cdk12	cell division protein kinase 12 isoform 2	2.03935	2.64082			2.34009
chr2	A2ATR4	NM_133840	Clp1	polyribonucleotide 5'-hydroxyl-kinase Clp1	Clp1	polyribonucleotide 5'-hydroxyl-kinase Clp1	2.23171	2.72491	2.06105		2.33922
chr1	B2Z893	NM_001162415	Pfkfb2	6-phosphofructo-2-kinase/fructose-2, 6-bisphosphatase 2 isoform 2	Pfkfb2	6-phosphofructo-2-kinase/fructose-2,	2.55391			2.11974	2.33683
chr11		NM_019511	Ramp3	receptor activity-modifying protein 3 precursor	Ramp3	Mus musculus receptor activity modifying protein 3 (Ramp3) mRNA, complete cds.	2.04195			2.62934	2.33564
chr17	NP_034864	NM_010734	Lst1	leukocyte-specific transcript 1 protein	Lst1	leukocyte-specific transcript 1 protein	2.37355	2.2974			2.33547
chr8		NM_001145552	Borcs8	BLOC-1-related complex subunit 8 isoform 1	2310045N01Rik	Mus musculus adult male tongue cDNA, RIKEN full-length enriched library, clone:2310045N01 product:hypothetical protein, full insert sequence.	2.38505		2.42132	2.19848	2.33495
chr8	Q9D665	NM_028725	Sdr42e1	short-chain dehydrogenase/reductase family 42E member 1	Sdr42e1	short-chain dehydrogenase/reductase family 42E		2.65072	2.01324		2.33198
chr7	Q91XQ5	NM_029935	Chst15	carbohydrate sulfotransferase 15	Chst15	carbohydrate sulfotransferase 15	2.15311	2.50427			2.32869
chr3	Q6PGN3	NM_027539	Dclk2	serine/threonine-protein kinase DCLK2 isoform 2	Dclk2	serine/threonine-protein kinase DCLK2 isoform 2	2.33314			2.32344	2.32829
chr11	Q9CPV0	NM_025838	Tmem107	transmembrane protein 107 isoform 1	Tmem107	transmembrane protein 107 isoform 1	2.42279			2.23095	2.32687
chr3	Q3U3Y7	NM_001122759	Pde7a	high affinity cAMP-specific 3',5'-cyclic phosphodiesterase 7A isoform 2	Pde7a	high affinity cAMP-specific 3',5'-cyclic	2.4522	2.20055			2.32637
chr7	Q9DAK8-2	NM_001162974	Lrrc51	leucine-rich repeat-containing protein 51 isoform 2	Lrrc51	leucine-rich repeat-containing protein 51	2.2792		2.36881		2.324
chr5	Q6GQV2	NM_001025426	Depdc5	GATOR complex protein DEPDC5 isoform 1	Depdc5	DEP domain-containing protein 5 isoform 1		2.56361		2.0834	2.3235
chr3	NP_775274	NM_173182	Fndc3b	fibronectin type III domain-containing protein 3B	Fndc3b	fibronectin type III domain-containing protein	2.22287	2.42319			2.32303
chr3	Q6NZB1	NM_178891	Prmt6	protein arginine N-methyltransferase 6	Prmt6	protein arginine N-methyltransferase 6	2.57632		2.06933		2.32282
chrX	B1AVE8	NM_021389	Sh3kbp1	SH3 domain-containing kinase-binding protein 1 isoform 2	Sh3kbp1	SH3 domain-containing kinase-binding protein 1	2.04098	2.60296			2.32197
chr5	Q3TJ55	NM_007941	Stx2	syntaxin-2 isoform a	Stx2	syntaxin-2	2.39828	2.2419			2.32009
chr1		NR_027859	Pfkfb2		Pfkfb2	6-phosphofructo-2-kinase/fructose-2,	2.19808		2.55722	2.20384	2.31971
chr1	Q6NS59	NM_026604	Fam135a	protein FAM135A	Fam135a	hypothetical protein LOC68187	2.33748	2.29731			2.31739
chr19	Q8BGW2-2	NM_146099	Wbp1l	WW domain binding protein 1-like isoform 2 precursor	D19Wsu162e	RecName: Full=Outcome predictor in acute leukemia 1 homolog;	2.26884	2.44468	2.22962		2.31438
chr7	Q8R2K1-4	NM_026928	Fuom	fucose mutarotase isoform 1	1810014F10Rik	protein fucU homolog			2.60953	2.01623	2.31288
chr17	Q3UIA1	NM_001045863	Nelfe	negative elongation factor E	Rdbp	negative elongation factor E	2.3735			2.2487	2.3111
chr14		NR_024069	n/a	n/a	2010107H07Rik	Mus musculus 10 day old male pancreas cDNA, RIKEN full-length enriched library, clone:1810011O20 product:hypothetical Ribosomal protein S14 containing protein, full insert sequence.		2.57786		2.03813	2.308
chr9	Q0VG49-2	NM_027090	2300009A05Rik	uncharacterized protein C15orf61 homolog precursor	2300009A05Rik	hypothetical protein LOC69478	2.1714	2.46005		2.29209	2.30785
chr3	B9EI20	NM_028915	Lrrcc1	leucine-rich repeat and coiled-coil domain-containing protein 1 isoform 3	Lrrcc1	leucine-rich repeat and coiled-coil	2.42856	2.18548			2.30702
chr2	A2AS57	NM_178723	Zfp385b	zinc finger protein 385B isoform 1	Zfp385b	zinc finger protein 385B isoform 1	2.50466			2.10875	2.30671
chr5	NP_001171373	NM_001177902	Zfp518b	zinc finger protein 518B	Zfp518b	zinc finger protein 518B		2.32429	2.28631		2.3053
chr6		n/a	n/a	n/a	n/a	Mus musculus cDNA clone IMAGE:3962411, partial cds.	2.33957	2.26975			2.30466
chr4	Q9D084	NM_027263	Apitd1	centromere protein S	Apitd1	centromere protein S		2.50386		2.10519	2.30452
chr19	Q91W63	NM_145497	Nmrk1	nicotinamide riboside kinase 1	BC016495	nicotinamide riboside kinase 1		2.35524	2.25355		2.30439
chr8	Q5DU14	NM_001081397	n/a	n/a	Myo16	myosin-XVI		2.05453	2.55415		2.30434
chr2	Q9QZ05-2	NM_001177806	Eif2ak4	eIF-2-alpha kinase GCN2 isoform 2	Eif2ak4	eukaryotic translation initiation factor 2-alpha	2.58693		2.01381		2.30037
chr11	B1AU57	NM_025276	Evpl	envoplakin	Evpl	envoplakin	2.19962	2.37083	2.32583		2.29876
chr11	Q9DBC9	NM_027919	Tha1	threonine aldolase 1	Tha1	SubName: Full=Putative uncharacterized protein; SubName: Full=Threonine aldolase 1;	2.0056		2.58718		2.29639
chr9		NM_027911	Raver1	ribonucleoprotein PTB-binding 1	Raver1	ribonucleoprotein PTB-binding 1			2.06152	2.53033	2.29592
chr6	NP_766316	NM_172728	Creb5	cyclic AMP-responsive element-binding protein 5 isoform 2	Creb5	cyclic AMP-responsive element-binding protein 5		2.38765		2.19867	2.29316
chr18	Q69Z69	NM_001081222	Esco1	N-acetyltransferase ESCO1	Esco1	N-acetyltransferase ESCO1	2.01189	2.57258			2.29223
chr4	Q6PEQ6	NM_019724	Mmp16	matrix metalloproteinase-16 preproprotein	Mmp16	matrix metalloproteinase-16 precursor	2.00001	2.57744			2.28873
chr2	B1AZ15	NM_177025	Cobll1	cordon-bleu protein-like 1 isoform 1	Cobll1	cordon-bleu protein-like 1 isoform 1			2.40769	2.16543	2.28656
chr12	Q8JZY4	NM_025373	1110008L16Rik	mitochondrial ribonuclease P protein 3 precursor	1110008L16Rik	mitochondrial ribonuclease P protein 3		2.33835	2.22761		2.28298
chr3	B2RRQ6	NM_008689	Nfkb1	nuclear factor NF-kappa-B p105 subunit	Nfkb1	nuclear factor NF-kappa-B p105 subunit		2.52848	2.03141		2.27995
chr11	Q3UNJ3	NM_001163481	Fkbp10	peptidyl-prolyl cis-trans isomerase FKBP10 isoform 2 precursor	Fkbp10	peptidyl-prolyl cis-trans isomerase FKBP10	2.40704		2.14276		2.2749
chr6	Q9Z1R6	NM_145983	Kcna5	potassium voltage-gated channel subfamily A member 5	Kcna5	potassium voltage-gated channel subfamily A	2.52177	2.133	2.16736		2.27404
chr11		n/a	n/a	n/a	Gm11974	Mus musculus ES cells cDNA, RIKEN full-length enriched library, clone:2410044B02 product:similar to Hermansky-Pudlak syndrome protein variant (Fragment) [Rattus norvegicus], full insert sequence.		2.12985	2.41778		2.27381
chr12		NM_001024853	Timm9	mitochondrial import inner membrane translocase subunit Tim9	Timm9	Mus musculus adult male spinal cord cDNA, RIKEN full-length enriched library, clone:A330050G20 product:hypothetical protein, full insert sequence.	2.025			2.52188	2.27344
chr10	Q91XK7	NM_010786	Mdm2	E3 ubiquitin-protein ligase Mdm2 isoform 1	Mdm2	SubName: Full=Putative uncharacterized protein; SubName: Full=Transformed mouse 3T3 cell double minute 2;		2.35964	2.1834		2.27152
chr5		NM_011806	Dmtf1	cyclin-D-binding Myb-like transcription factor 1 isoform 1	Dmtf1	Mus musculus 10 days neonate skin cDNA, RIKEN full-length enriched library, clone:4732497F22 product:cyclin D binding myb-like transcription factor 1, full insert sequence.		2.31855		2.22208	2.27032
chr5	NP_775089	NM_173066	Ep400	E1A-binding protein p400 isoform 2	Ep400	E1A-binding protein p400 isoform 2	2.06102		2.4789		2.26996
chrX	Q9CXL6	NM_010025	Dcx	neuronal migration protein doublecortin isoform c	Dcx	neuronal migration protein doublecortin isoform	2.1993	2.33929			2.2693
chr9	NP_598471	NM_133710	Ctdspl	CTD small phosphatase-like protein	Ctdspl	CTD small phosphatase-like protein		2.13776	2.40074		2.26925
chr9	Q3TGW2	NM_026189	Eepd1	endonuclease/exonuclease/phosphatase family domain-containing protein 1	Eepd1	endonuclease/exonuclease/phosphatase family	2.386		2.14475		2.26538
chr4	A2A9K3	NM_144527	Cep85	centrosomal protein of 85 kDa	Ccdc21	coiled-coil domain-containing protein 21	2.1247	2.40533		2.26484	2.26496
chr17	Q9Z1P8	NM_020581	Angptl4	angiopoietin-related protein 4 precursor	Angptl4	angiopoietin-related protein 4	2.34816	2.27649	2.16593		2.26353
chr13	NP_150371	NM_033268	Actn2	alpha-actinin-2	Actn2	alpha-actinin-2	2.43826	2.0877			2.26298
chr7		NM_153783	Paox	peroxisomal N(1)-acetyl-spermine/spermidine oxidase isoform 1	Paox	Mus musculus peroxisomal N1-acetyl-spermine/spermidine oxidase (Pao) mRNA, complete cds.	2.23578			2.28789	2.26184
chr8	NP_081131	NM_026855	Arv1	protein ARV1	Arv1	protein ARV1		2.24819		2.27386	2.26103
chr2	Q9D5U8	NM_027585	Cnbd2	cyclic nucleotide-binding domain-containing protein 2 isoform 1	4921517L17Rik	hypothetical protein LOC70873		2.14272	2.37386		2.25829
chr11	Q52L97	NM_010655	Kpna2	importin subunit alpha-1	Kpna2	importin subunit alpha-2	2.32724	2.09629		2.34317	2.25557
chr11		NM_027827	Afmid	kynurenine formamidase	Afmid	Mus musculus cellugyrin mRNA, complete cds.		2.12528	2.3814		2.25334
chr4	Q9D572	NM_026257	Ubxn11	UBX domain-containing protein 11	Ubxn11	UBX domain-containing protein 11	2.24273	2.18228	2.33411		2.25304
chr9	Q8CJ69	NM_028472	Bmper	BMP-binding endothelial regulator protein precursor	Bmper	BMP-binding endothelial regulator protein		2.093	2.41156		2.25228
chr18		n/a	n/a	n/a	n/a	Mus musculus 2 days pregnant adult female oviduct cDNA, RIKEN full-length enriched library, clone:E230023M07 product:unclassifiable, full insert sequence.			2.34656	2.15163	2.2491
chr8	Q6PFH3-2	NM_172502	Dcaf15	DDB1- and CUL4-associated factor 15	Dcaf15	DDB1- and CUL4-associated factor 15	2.32178	2.02395		2.39526	2.247
chr17	NP_031465	NM_007439	Alk	ALK tyrosine kinase receptor precursor	Alk	ALK tyrosine kinase receptor precursor		2.4504	2.2046	2.07699	2.244
chr4	P97863	NM_001113209	Nfib	nuclear factor 1 B-type isoform 1	Nfib	nuclear factor 1 B-type isoform 3	2.21276	2.27105			2.24191
chr9	Q3URS9	NM_025689	Ccdc51	coiled-coil domain-containing protein 51	Ccdc51	coiled-coil domain-containing protein 51	2.07954	2.23102	2.41449		2.24168
chr9	O88632	NM_011349	Sema3f	semaphorin-3F isoform 2 precursor	Sema3f	semaphorin-3F		2.32637	2.15419		2.24028
chr1	Q8BRM2	NM_178883	Gorab	RAB6-interacting golgin isoform 1	Gorab	RAB6-interacting golgin	2.22589	2.25423			2.24006
chr7	Q8C753	NM_001081022	D430042O09Rik	protein KIAA0556	D430042O09Rik	hypothetical protein LOC233865			2.458	2.02059	2.2393
chr6	Q8K3I9-2	NM_133236	Glcci1	glucocorticoid-induced transcript 1 protein isoform 1	Gm16039	glucocorticoid-induced transcript 1 protein	2.04418	2.41995			2.23206
chr2	B1AVY7	NM_001081133	Kif16b	kinesin-like protein KIF16B	Kif16b	kinesin family member 16B		2.26025	2.31723	2.11829	2.23192
chr11	Q8R3L0	NM_175002	Mmgt2	membrane magnesium transporter 2 precursor	Mmgt2	membrane magnesium transporter 2 precursor	2.20776	2.25221		2.22765	2.22921
chr2	Q3TYM2	NM_001159570	Meis2	homeobox protein Meis2 isoform 6	Meis2	homeobox protein Meis2 isoform 6	2.39209		2.06505		2.22857
chr8	NP_001005864	NM_001005864	Mtus1	microtubule-associated tumor suppressor 1 homolog isoform 3	Mtus1	microtubule-associated tumor suppressor 1		2.26033	2.09273	2.33155	2.2282
chr16	Q8C4V0	NR_027959	B830017H08Rik		n/a	SubName: Full=Putative uncharacterized protein;	2.21286	2.23603			2.22445
chr3	A6H659	NM_053182	Pag1	phosphoprotein associated with glycosphingolipid-enriched microdomains 1	Pag1	phosphoprotein associated with	2.44546	2.00212			2.22379
chr5	Q5U3L0	NM_011893	Sh3bp2	SH3 domain-binding protein 2 isoform a	Sh3bp2	SH3 domain-binding protein 2 isoform a	2.08004	2.36649			2.22327
chr10	Q9CQQ8	NM_025349	Lsm7	U6 snRNA-associated Sm-like protein LSm7	Lsm7	U6 snRNA-associated Sm-like protein LSm7		2.08181	2.36462		2.22321
chr3	NP_001074795	NM_001081326	Agl	glycogen debranching enzyme	Agl	glycogen debranching enzyme	2.03779	2.19864	2.42991		2.22211
chr2	NP_001139556	NM_001146084	Fastkd5	FAST kinase domain-containing protein 5, mitochondrial	Fastkd5	FAST kinase domain-containing protein 5	2.21305	2.41267	2.0405		2.22207
chr4	Q6GQS8	NR_033123	4933409K07Rik		Gm10598	SubName: Full=Putative uncharacterized protein;		2.35141		2.09244	2.22192
chr5	Q541V2	NM_138646	Hps4	Hermansky-Pudlak syndrome 4 protein homolog	Hps4	Hermansky-Pudlak syndrome 4 protein homolog	2.13551	2.47397	2.056		2.22183
chr5	Q8R1D8	NM_023232	Diablo	diablo homolog, mitochondrial precursor	Diablo	SubName: Full=Diablo protein;	2.26695	2.29113	2.3121	2.0159	2.22152
chr1	Q8C0R0-2	NM_176972	Usp37	ubiquitin carboxyl-terminal hydrolase 37 isoform 1	Usp37	ubiquitin carboxyl-terminal hydrolase 37	2.03613	2.40388			2.22001
chr11	Q8C0E6	NM_138949	Zfp286	zinc finger protein 286A	Zfp286	zinc finger protein 286	2.27798	2.16066			2.21932
chr7		NM_001163574	Tjp1	tight junction protein ZO-1 isoform 2	Tjp1	Mus musculus adult male gall bladder cDNA, RIKEN full-length enriched library, clone:G630084E05 product:tight junction protein 1, full insert sequence.			2.22209	2.21589	2.21899
chr4	Q9EQR6	NM_053081	Fancg	Fanconi anemia group G protein homolog isoform 1	Fancg	Fanconi anemia group G protein homolog isoform		2.27927	2.15408		2.21667
chr16	D3YU82	NM_175650	Atp13a5	probable cation-transporting ATPase 13A5 isoform 1	Atp13a5	probable cation-transporting ATPase 13A5		2.41425	2.01569		2.21497
chr10		NR_028310	4930503E24Rik		n/a	Mus musculus adult male testis cDNA, RIKEN full-length enriched library, clone:4930503E24 product:EUKARYOTIC TRANSLATION INITIATION FACTOR 3 SUBUNIT 2 (EIF-3 BETA) (EIF3 P36) (TGF-BETA RECEPTOR INTERACTING PROTEIN 1) (TRIP-1) homolog [Homo sapiens], full insert sequence.	2.24253		2.17198		2.20725
chr14	NP_001074721	NM_001081252	Uggt2	UDP-glucose:glycoprotein glucosyltransferase 2 precursor	Uggt2	UDP-glucose:glycoprotein glucosyltransferase 2	2.38576	2.0286			2.20718
chr4	B1AXJ7	NM_001080926	Lrp8	low-density lipoprotein receptor-related protein 8 precursor	Lrp8	low-density lipoprotein receptor-related protein	2.23916	2.17137			2.20526
chr17	Q3UYH8	NM_009625	Adcyap1	pituitary adenylate cyclase-activating polypeptide isoform 1 preproprotein	Adcyap1	pituitary adenylate cyclase-activating		2.04241	2.3655		2.20395
chr4		NM_001004156	n/a	n/a	Plekhg5	Mus musculus mRNA for mKIAA0720 protein.	2.05778		2.40875	2.14412	2.20355
chr17	Q8CFF3	NM_145484	Zfp758	zinc finger protein 758 isoform 1	Zfp758	zinc finger protein 758	2.09816	2.21462	2.2961		2.20296
chr3	Q5HZJ5	NM_001014995	Fam189b	protein FAM189B	Fam189b	RecName: Full=Protein FAM189B;	2.27029			2.12818	2.19923
chr8	Q80Y32	NM_178017	Hmgxb4	HMG domain-containing protein 4 isoform 1	Hmgxb4	SubName: Full=HMG box domain containing 4; SubName: Full=High mobility group box 2-like 1;		2.12185	2.27343		2.19764
chr2	Q3UU58	NM_028757	Nebl	nebulette	Nebl	SubName: Full=Putative uncharacterized protein;	2.31673		2.07098		2.19386
chr17	Q7TT01	NM_016670	Pknox1	homeobox protein PKNOX1	Pknox1	homeobox protein PKNOX1		2.2429	2.03012	2.3018	2.19161
chr18	NP_963894	NM_201600	Myo5b	unconventional myosin-Vb	Myo5b	myosin-Vb	2.13023	2.24924			2.18973
chr5	D3YXR8	NM_001081388	Rimbp2	RIMS-binding protein 2 isoform 1	Rimbp2	RIMS-binding protein 2	2.27132		2.10778		2.18955
chr1		n/a	n/a	n/a	n/a	Mus musculus adult male hypothalamus cDNA, RIKEN full-length enriched library, clone:A230008D12 product:unclassifiable, full insert sequence.	2.15428	2.25746	2.13554		2.18243
chr13	Q14DI0	NM_178875	Zfp935	KRAB zinc finger protein isoform 1	Zfp935	KRAB zinc finger protein isoform 1	2.16314		2.19821		2.18067
chr4	B2RQD4	NM_001165999	Lingo2	leucine-rich repeat and immunoglobulin-like domain-containing nogo receptor-interacting protein 2 precursor	Lingo2	leucine-rich repeat and immunoglobulin-like	2.1732		2.34097	2.02748	2.18055
chr11	Q9D3U0	NM_001033654	Pus10	putative tRNA pseudouridine synthase Pus10	Pus10	putative tRNA pseudouridine synthase Pus10		2.17309	2.18654		2.17982
chrX		n/a	n/a	n/a	n/a	Mus musculus cDNA clone IMAGE:5693306, partial cds.	2.01365		2.34256		2.17811
chrX	A2AEG2	NM_177429	Ofd1	oral-facial-digital syndrome 1 protein homolog	Ofd1	oral-facial-digital syndrome 1 protein homolog		2.19663	2.15873		2.17768
chr10		NM_001081428	Fam184a	protein FAM184A	Fam184a	Mus musculus adult male testis cDNA, RIKEN full-length enriched library, clone:4930589M24 product:similar to CDNA FLJ13942 FIS, CLONE Y79AA1000962, WEAKLY SIMILAR TO MYOSIN HEAVY CHAIN, NON-MUSCLE [Homo sapiens], full insert sequence.	2.0477	2.30718			2.17744
chr8	Q9ERQ8	NM_053070	Car7	carbonic anhydrase 7 isoform a.	Car7	carbonic anhydrase 7			2.18696	2.16526	2.17611
chr11	Q9D7E3	NM_027136	Ovca2	esterase OVCA2	Ovca2	ovarian cancer-associated gene 2 protein	2.23574		2.11639		2.17606
chr3		n/a	n/a	n/a	n/a	Mus musculus adult male spinal cord cDNA, RIKEN full-length enriched library, clone:A330004H06 product:unclassifiable, full insert sequence.		2.11327	2.23656		2.17491
chr7	Q7TPN9	NM_145589	Prr14	proline-rich protein 14	Prr14	proline-rich protein 14		2.06953	2.38588	2.06328	2.1729
chr7	Q8K083	NM_172385	Zfp536	zinc finger protein 536	Zfp536	zinc finger protein 536	2.02435	2.32027	2.17153		2.17205
chr5	Q02395	NM_013827	Mtf2	metal-response element-binding transcription factor 2 isoform 1	Mtf2	metal-response element-binding transcription			2.29273	2.05048	2.17161
chr17	Q6ZPF3-3	NM_011878	Tiam2	T-lymphoma invasion and metastasis-inducing protein 2 isoform 1	Tiam2	T-lymphoma invasion and metastasis-inducing	2.33759		2.00381		2.1707
chr7	Q9CXT6	NM_029842	Kdm8	lysine-specific demethylase 8	Jmjd5	lysine-specific demethylase 8	2.03849	2.30179			2.17014
chr2	Q8K2I9-2	NM_015792	Fbxo18	F-box DNA helicase 1 isoform 1	Fbxo18	F-box only protein 18	2.44274		2.0252	2.04047	2.16947
chr14		n/a	n/a	n/a	Rbm26	Mus musculus adult male testis cDNA, RIKEN full-length enriched library, clone:1700009P03 product:RIKEN cDNA 1700009P03 gene, full insert sequence.	2.10781		2.22445		2.16613
chr13	P97433-2	NM_012026	Arhgef28	rho guanine nucleotide exchange factor 28	Rgnef	rho-guanine nucleotide exchange factor	2.03711	2.29437			2.16574
chr15	NP_001156937	NM_001163465	Rhpn1	rhophilin-1 isoform 1	Rhpn1	rhophilin-1 isoform 1	2.22074		2.10893		2.16484
chr14	NP_542764	NM_080726	Rem2	GTP-binding protein REM 2	Rem2	GTP-binding protein REM 2	2.29521		2.03306		2.16413
chr11	Q80UK8	NM_027421	Ints2	integrator complex subunit 2	Ints2	integrator complex subunit 2	2.05788		2.26788		2.16288
chr2	A2ATN3	NM_172268	Nup214	nuclear pore complex protein Nup214	Nup214	nuclear pore complex protein Nup214			2.0023	2.32227	2.16228
chr4	Q3U6K5	NM_026470	Spata6	spermatogenesis-associated protein 6 precursor	Spata6	spermatogenesis-associated protein 6 precursor	2.09811	2.22269			2.1604
chr3	Q9JKN1	NM_023214	Slc30a7	zinc transporter 7	Slc30a7	zinc transporter 7	2.16376	2.15655			2.16016
chr4	Q8BIY1	NM_172876	Gpatch3	G patch domain-containing protein 3	Gpatch3	G patch domain-containing protein 3			2.1533	2.16218	2.15774
chrX	Q6P5G5	NM_008222	Hccs	cytochrome c-type heme lyase	Hccs	cytochrome c-type heme lyase	2.28076			2.01668	2.14872
chr8		n/a	n/a	n/a	Gm16994	Mus musculus adult male olfactory brain cDNA, RIKEN full-length enriched library, clone:6430520O20 product:unclassifiable, full insert sequence.	2.08713		2.20979		2.14846
chr11	Q7TSF4-2	NM_198861	Lrrc75a	leucine-rich repeat-containing protein 75A	BC046404	RecName: Full=Leucine-rich repeat-containing protein C17orf76 homolog;			2.21245	2.08423	2.14834
chr12	Q7M6Y2	NM_009234	Sox11	transcription factor SOX-11	Sox11	transcription factor SOX-11	2.18239	2.11206			2.14722
chr2	A2ARU0	NM_177846	Lcmt2	tRNA wybutosine-synthesizing protein 4	Lcmt2	leucine carboxyl methyltransferase 2	2.00922		2.28371		2.14647
chr10	NP_997405	NM_207522	Mettl25	methyltransferase-like protein 25	BC067068	hypothetical protein LOC216292	2.17428	2.04592	2.21665		2.14562
chr4	A8WHZ1	NM_001145956	Pigv	GPI mannosyltransferase 2 isoform 3	Pigv	GPI mannosyltransferase 2 isoform 3		2.15987		2.12937	2.14462
chr11	Q3TYQ1	NM_173388	Slc43a2	large neutral amino acids transporter small subunit 4	Slc43a2	large neutral amino acids transporter small	2.02424		2.25767		2.14095
chr4	Q8BKP2	NM_145547	Zfp189	zinc finger protein 189	Zfp189	zinc finger protein 189	2.15783	2.20337		2.05838	2.13986
chr19	Q9CR24	NM_025529	Nudt8	nucleoside diphosphate-linked moiety X motif 8	Nudt8	nucleoside diphosphate-linked moiety X motif 8,	2.10897			2.16989	2.13943
chr7	Q80ZX2	NM_001145880	Zfp790	zinc finger protein 790	Zfp790	zinc finger protein 790	2.27217			2.00122	2.1367
chr8	Q5DTU1	NM_053171	Csmd1	CUB and sushi domain-containing protein 1 precursor	Csmd1	SubName: Full=MKIAA1890 protein; Flags: Fragment;	2.25288		2.01992		2.1364
chr2	Q3U6R8	NM_145522	Rabepk	rab9 effector protein with kelch motifs	Rabepk	SubName: Full=Putative uncharacterized protein;	2.15536	2.11181			2.13359
chr18	A3KMN5	NM_001081224	Prr16	protein Largen	Prr16	proline-rich protein 16		2.21628	2.04371		2.13
chr7	D3Z3W8	NM_009746	Bcl7c	B-cell CLL/lymphoma 7 protein family member C isoform 2	Bcl7c	SubName: Full=Putative uncharacterized protein Bcl7c;	2.01852			2.23871	2.12861
chr4	Q562G0	NM_020035	Pigo	GPI ethanolamine phosphate transferase 3 isoform 1	Pigo	GPI ethanolamine phosphate transferase 3		2.06181	2.26658	2.05483	2.12774
chr17	Q6NZJ3	NM_207245	Zfp870	zinc finger protein 870	Zfp870	zinc finger protein 870		2.03428	2.2201		2.12719
chr1		NM_029846	Atg16l1	autophagy-related protein 16-1 isoform 2	Atg16l1	Mus musculus mRNA for Apg16L alpha, complete cds.		2.08194		2.17152	2.12673
chr13	Q7TPQ8	NM_133219	Gcnt2	N-acetyllactosaminide beta-1,6-N-acetylglucosaminyl-transferase isoform C	Gcnt2	N-acetyllactosaminide	2.11353	2.07196	2.18883		2.12477
chr3	Q3TFY5	NM_008802	Pde7a	high affinity cAMP-specific 3',5'-cyclic phosphodiesterase 7A isoform 1 precursor	Pde7a	high affinity cAMP-specific 3',5'-cyclic			2.18096	2.06145	2.1212
chr7	Q9CXJ1	NM_026140	Ears2	probable glutamate--tRNA ligase, mitochondrial precursor	Ears2	probable glutamyl-tRNA synthetase, mitochondrial	2.23677		2.00515	2.09689	2.11294
chr3	Q3KNY5-2	NM_025506	Riiad1	RIIa domain-containing protein 1	Riiad1	RIIa domain-containing protein C1orf230 homolog	2.08497	2.14024			2.11261
chr13	Q14DR9	NM_026184	Ero1lb	ERO1-like protein beta precursor	Ero1lb	ERO1-like protein beta precursor		2.15153		2.06828	2.10991
chr19	Q5H8C4	NM_173028	Vps13a	vacuolar protein sorting-associated protein 13A	Vps13a	vacuolar protein sorting-associated protein 13A	2.11771	2.10108			2.1094
chr12	NP_665897	NM_145890	Grhl1	grainyhead-like protein 1 homolog isoform 2	Grhl1	grainyhead-like protein 1 homolog isoform 2	2.05627	2.16131			2.10879
chr3	Q7TPW1	NM_199465	Nexn	nexilin	Nexn	nexilin			2.083	2.12499	2.104
chr4	NP_001157266	NM_001163794	Pdik1l	serine/threonine-protein kinase PDIK1L	Pdik1l	serine/threonine-protein kinase PDIK1L	2.07181			2.12074	2.09628
chr11	B1ASX3	NM_011786	Aloxe3	hydroperoxide isomerase ALOXE3	Aloxe3	epidermis-type lipoxygenase 3	2.14397		2.04739		2.09568
chr3	Q3TVW1	NM_001144987	Spg20	spartin isoform a	Spg20	spartin isoform a		2.06306	2.13242	2.08458	2.09335
chr15	Q8CCJ9-3	NM_001081409	Phf20l1	PHD finger protein 20-like protein 1	Phf20l1	RecName: Full=Tudor domain-containing protein PHF20L1;	2.09664	2.08542			2.09103
chr4		n/a	n/a	n/a	Gm10931	Mus musculus adult male aorta and vein cDNA, RIKEN full-length enriched library, clone:A530086H01 product:unclassifiable, full insert sequence.		2.08327	2.00123	2.1733	2.08593
chr5	Q02395-2	NM_013827	Mtf2	metal-response element-binding transcription factor 2 isoform 1	Mtf2	metal-response element-binding transcription	2.03088	2.13936			2.08512
chr18	P52963	NM_013512	Epb41l4a	band 4.1-like protein 4A	Epb4.1l4a	band 4.1-like protein 4A	2.09045			2.06199	2.07622
chr8	NP_001186917	NM_001199988	Tti2	TELO2-interacting protein 2 isoform b	BC019943	hypothetical protein LOC234138 isoform b	2.1423			2.00492	2.07361
chr6	B9EKC0	NM_001029850	Magi1	membrane-associated guanylate kinase, WW and PDZ domain-containing protein 1 isoform c	Magi1	membrane-associated guanylate kinase, WW and PDZ	2.11019	2.02489			2.06754
chr4	B1ASD4	NM_175308	Mob3c	MOB kinase activator 3C	Mobkl2c	mps one binder kinase activator-like 2C	2.01067		2.12216		2.06642
chr9	NP_751894	NM_172162	Hinfp	histone H4 transcription factor	Hinfp	histone H4 transcription factor	2.04734		2.08463		2.06599
chr15	NP_001158098	NM_001164626	Cdpf1	cysteine-rich DPF motif domain-containing protein 1	2210021J22Rik	hypothetical protein LOC72355		2.02806		2.09908	2.06357
chr8	Q9D5D8	NM_029441	Cdyl2	chromodomain Y-like protein 2	Cdyl2	chromodomain Y-like protein 2		2.01066		2.10472	2.05769
chr5		NM_172712	Uba6	ubiquitin-like modifier-activating enzyme 6	Uba6	Mus musculus 8 days embryo whole body cDNA, RIKEN full-length enriched library, clone:5730448D02 product:unclassifiable, full insert sequence.		2.08498	2.01559		2.05028
chr1	P50752-2	NM_011619	Tnnt2	troponin T, cardiac muscle isoform f	Tnnt2	troponin T, cardiac muscle isoform f	2.04775		2.05209		2.04992
chr1	Q8VEB3	NM_133825	D1Ertd622e	UNC119-binding protein C5orf30 homolog	D1Ertd622e	hypothetical protein LOC52392		2.07182		2.02242	2.04712
chr1	Q04999	NM_008381	Inhbb	inhibin beta B chain preproprotein	Inhbb	inhibin beta B chain precursor	2.0333		2.05691		2.0451
chr6	NP_001094913	NM_001101443	Prrt4	proline-rich transmembrane protein 4 precursor	Prrt4	proline-rich transmembrane protein 4		2.057	2.03281		2.0449
chr17	Q3TRG0	NM_001033442	Gm1604b	uncharacterized protein LOC381059	Gm1604b	hypothetical protein LOC381059		2.01005		2.05481	2.03243
